# Supplementary material
Source: MDPI journal article supplement (https://www.mdpi.com/2073-4441/13/11/1569)
Supplement: s1 [file s1]

## Supplementary Material

### Drivers of macrophyte and diatom diversity in a shallow hypertrophic lake

Kateřina Šumberová<sup>1\*</sup>, Ondřej Vild<sup>1</sup>, Michal Ducháček<sup>3</sup>, Martina Fabšičová<sup>1</sup>, Jan Potužák<sup>2</sup>, and Markéta Fránková<sup>4</sup>

\* Correspondence: katerina.sumberova@ibot.cas.cz

**Table S6.** List of diatom taxa found in particular samples of epiphyton of the Dehtář fishpond in 2015, 2016 and 2019. At least 400 diatom valves were counted and identified in each sample. In the case of the occurrence of highly dominant species where a higher number of diatom cells occurred at one site, all of them were counted, resulting usually in higher counts than 400 diatom valves in a sample. Each taxon is given a colour according to its affiliation to a particular FT group: green – planktonic taxa from FT1, red – attached periphytic taxa from FT2, purple – attachable benthic araphid taxa from FT3, yellow – attachable benthic taxa with raphe with fibulae from FT4, blue – motile benthic raphid taxa from FT5.



| year 2015                                                             | F1 | F2 | F3 | F4 | F5 | F6 | F7 | F8 | B9 | B10 | B11 | B12 | B13 | B14 | B15 | B16 | B17 | D18 | D19 | D20 | D21 |
|-----------------------------------------------------------------------|----|----|----|----|----|----|----|----|----|-----|-----|-----|-----|-----|-----|-----|-----|-----|-----|-----|-----|
| <i>Cyclotella meneghiniana</i> Kützing                                | 0  | 0  | 0  | 4  | 1  | 1  | 2  | 0  | 0  | 8   | 1   | 1   | 0   | 5   | 2   | 0   | 2   | 3   | 0   | 0   | 1   |
| <i>Cymatopleura solea</i> (Brébisson) W. Smith                        | 1  | 0  | 0  | 0  | 0  | 0  | 0  | 0  | 0  | 0   | 0   | 0   | 0   | 1   | 0   | 0   | 1   | 0   | 0   | 0   | 0   |
| <i>Cymbella cf. subcistula</i> Krammer                                | 0  | 0  | 0  | 0  | 0  | 0  | 1  | 0  | 0  | 0   | 0   | 0   | 0   | 0   | 0   | 0   | 0   | 0   | 0   | 0   | 0   |
| <i>Cymbella neocistula</i> Krammer                                    | 0  | 0  | 0  | 0  | 0  | 0  | 0  | 0  | 0  | 0   | 0   | 0   | 0   | 1   | 0   | 0   | 0   | 0   | 0   | 0   | 0   |
| <i>Cymbella</i> sp.                                                   | 0  | 0  | 0  | 0  | 0  | 0  | 0  | 0  | 0  | 0   | 0   | 0   | 0   | 0   | 0   | 0   | 0   | 0   | 0   | 0   | 0   |
| <i>Discostella pseudosteligera</i> (Hustedt) Houk & Klee              | 0  | 0  | 0  | 0  | 0  | 0  | 0  | 0  | 0  | 0   | 0   | 0   | 0   | 0   | 0   | 0   | 0   | 0   | 0   | 0   | 0   |
| <i>Encyonema auerswaldii</i> Rabenhorst                               | 6  | 10 | 1  | 26 | 2  | 4  | 12 | 0  | 0  | 0   | 0   | 0   | 0   | 0   | 0   | 0   | 1   | 0   | 0   | 0   | 0   |
| <i>Encyonema minutum</i> agg.                                         | 1  | 2  | 3  | 2  | 2  | 0  | 1  | 0  | 0  | 1   | 0   | 1   | 0   | 0   | 0   | 0   | 1   | 2   | 1   | 1   | 1   |
| <i>Epithemia</i> sp.                                                  | 0  | 0  | 0  | 0  | 0  | 0  | 0  | 0  | 0  | 0   | 0   | 0   | 0   | 0   | 0   | 0   | 0   | 0   | 0   | 0   | 0   |
| <i>Eunotia bidens</i> Ehrenberg                                       | 0  | 0  | 0  | 0  | 0  | 0  | 0  | 0  | 0  | 0   | 0   | 0   | 0   | 0   | 0   | 0   | 0   | 0   | 0   | 0   | 0   |
| <i>Eunotia bilunaris</i> (Ehrenberg) Schaarschmidt                    | 0  | 0  | 0  | 0  | 0  | 0  | 0  | 0  | 0  | 0   | 0   | 0   | 0   | 0   | 0   | 0   | 0   | 0   | 0   | 0   | 0   |
| <i>Eunotia</i> sp.                                                    | 0  | 0  | 0  | 0  | 0  | 0  | 0  | 0  | 0  | 0   | 0   | 0   | 0   | 0   | 0   | 0   | 0   | 0   | 0   | 0   | 0   |
| <i>Fallacia pygmaea</i> (Kützing) A.J.Stickle & D.G.Mann              | 0  | 1  | 0  | 0  | 0  | 2  | 0  | 0  | 1  | 0   | 1   | 0   | 2   | 3   | 2   | 0   | 5   | 1   | 0   | 1   | 0   |
| <i>Fistulifera saprophila</i> (Lange-Bertalot & Bonik) Lange-Bertalot | 5  | 3  | 6  | 0  | 4  | 0  | 0  | 0  | 0  | 0   | 0   | 0   | 0   | 4   | 0   | 0   | 2   | 6   | 0   | 0   | 1   |
| <i>Fragilaria capucina</i> Desmazières                                | 0  | 2  | 1  | 0  | 0  | 3  | 0  | 0  | 0  | 0   | 0   | 1   | 1   | 0   | 0   | 0   | 0   | 2   | 1   | 1   | 7   |
| <i>Fragilaria gracilis</i> Østrup                                     | 0  | 0  | 0  | 0  | 0  | 0  | 0  | 0  | 0  | 0   | 0   | 0   | 0   | 0   | 0   | 0   | 0   | 0   | 0   | 0   | 0   |
| <i>Fragilaria perdelicatissima</i> Lange-Bertalot & Van de Vijver     | 0  | 0  | 0  | 0  | 0  | 0  | 0  | 0  | 0  | 0   | 0   | 0   | 0   | 0   | 0   | 0   | 0   | 0   | 0   | 0   | 0   |
| <i>Fragilaria radians</i> (Kützing) D.M. Williams & Round             | 0  | 0  | 0  | 0  | 0  | 0  | 0  | 0  | 0  | 0   | 0   | 0   | 0   | 0   | 0   | 0   | 0   | 0   | 0   | 0   | 0   |
| <i>Fragilaria recapitulata</i> Lange-Bertalot & Metzeltin             | 0  | 0  | 0  | 0  | 0  | 0  | 0  | 2  | 0  | 0   | 1   | 2   | 0   | 1   | 0   | 1   | 0   | 1   | 2   | 2   | 2   |
| <i>Fragilaria rumpens</i> (Kützing) Carlson                           | 0  | 0  | 0  | 0  | 0  | 0  | 0  | 0  | 0  | 0   | 0   | 0   | 0   | 0   | 0   | 0   | 0   | 0   | 0   | 0   | 0   |
| <i>Fragilaria saxoplanctonica</i> Lange-Bertalot & Ulrich             | 0  | 0  | 0  | 0  | 0  | 0  | 0  | 0  | 0  | 0   | 0   | 0   | 0   | 0   | 0   | 0   | 0   | 0   | 0   | 0   | 0   |
| <i>Fragilaria tenera</i> (W.Smith) Lange-Bertalot                     | 7  | 0  | 3  | 0  | 0  | 0  | 0  | 0  | 0  | 0   | 0   | 0   | 0   | 0   | 0   | 0   | 0   | 3   | 0   | 0   | 0   |
| <i>Fragilaria vaucheriae</i> (Kützing) Petersen                       | 1  | 1  | 1  | 9  | 0  | 0  | 1  | 0  | 0  | 0   | 2   | 0   | 0   | 0   | 0   | 0   | 0   | 1   | 0   | 1   | 0   |
| <i>Fragilariforma virescens</i> (Ralfs) D.M. Williams & Round         | 0  | 0  | 0  | 0  | 0  | 0  | 0  | 0  | 0  | 0   | 0   | 0   | 0   | 0   | 0   | 0   | 0   | 0   | 0   | 0   | 0   |
| <i>Frustulia vulgaris</i> (Thwaites) De Toni                          | 1  | 0  | 0  | 0  | 0  | 0  | 0  | 0  | 0  | 0   | 0   | 0   | 0   | 0   | 0   | 0   | 0   | 0   | 0   | 0   | 0   |
| <i>Geisleria cummerowi</i> (L. Kalbe) Lange-Bertalot                  | 0  | 0  | 0  | 0  | 0  | 0  | 0  | 0  | 0  | 0   | 0   | 0   | 0   | 0   | 0   | 0   | 0   | 0   | 0   | 0   | 0   |
| <i>Geisleria</i> sp.                                                  | 0  | 0  | 0  | 0  | 0  | 0  | 0  | 0  | 0  | 0   | 0   | 0   | 0   | 0   | 0   | 0   | 0   | 0   | 0   | 0   | 0   |
| <i>Gomphonema clavatum</i> Reichardt                                  | 0  | 0  | 0  | 0  | 0  | 0  | 0  | 0  | 0  | 1   | 0   | 0   | 0   | 0   | 0   | 0   | 0   | 0   | 0   | 0   | 0   |
| <i>Gomphonema graciledictum</i> Reichardt                             | 5  | 4  | 0  | 0  | 0  | 2  | 1  | 0  | 0  | 0   | 0   | 0   | 0   | 0   | 0   | 0   | 0   | 0   | 0   | 0   | 1   |
| <i>Gomphonema innocens</i> Reichardt                                  | 0  | 0  | 0  | 0  | 0  | 0  | 0  | 0  | 0  | 0   | 0   | 0   | 0   | 0   | 0   | 1   | 0   | 0   | 1   | 0   | 0   |
| <i>Gomphonema italicum</i> Kützing                                    | 0  | 0  | 0  | 0  | 0  | 0  | 0  | 0  | 0  | 0   | 0   | 0   | 0   | 0   | 0   | 0   | 0   | 0   | 0   | 0   | 0   |
| <i>Gomphonema minutum</i> (C. Agardh) C. Agardh                       | 0  | 0  | 0  | 0  | 0  | 0  | 0  | 0  | 0  | 0   | 0   | 0   | 0   | 0   | 0   | 0   | 0   | 0   | 0   | 0   | 0   |
| <i>Gomphonema pala</i> Reichardt                                      | 0  | 0  | 0  | 0  | 0  | 0  | 0  | 0  | 0  | 0   | 0   | 0   | 0   | 0   | 0   | 0   | 0   | 0   | 0   | 0   | 0   |
| <i>Gomphonema parvulum</i> agg.                                       | 24 | 38 | 6  | 19 | 29 | 21 | 50 | 1  | 0  | 9   | 0   | 2   | 0   | 2   | 0   | 6   | 7   | 7   | 6   | 1   | 24  |

| year 2015                                                                    | F1  | F2  | F3 | F4  | F5  | F6  | F7  | F8 | B9 | B10 | B11 | B12 | B13 | B14 | B15 | B16 | B17 | D18 | D19 | D20 | D21 |
|------------------------------------------------------------------------------|-----|-----|----|-----|-----|-----|-----|----|----|-----|-----|-----|-----|-----|-----|-----|-----|-----|-----|-----|-----|
| <i>Gomphonema pseudaugur</i> Lange-Bertalot                                  | 0   | 0   | 0  | 0   | 0   | 0   | 0   | 0  | 0  | 0   | 0   | 0   | 0   | 0   | 0   | 0   | 0   | 0   | 0   | 0   | 0   |
| <i>Gomphonema pumilum</i> (Grunow) Reichardt & Lange-Bertalot                | 0   | 0   | 0  | 0   | 0   | 0   | 0   | 0  | 0  | 0   | 0   | 0   | 0   | 0   | 0   | 0   | 0   | 0   | 0   | 0   | 0   |
| <i>Gomphonema sarcophagus</i> Gregory                                        | 0   | 0   | 0  | 0   | 0   | 0   | 0   | 0  | 0  | 0   | 0   | 0   | 0   | 0   | 0   | 0   | 0   | 0   | 0   | 0   | 0   |
| <i>Gomphonema subclavatum</i> (Grunow) Grunow                                | 0   | 0   | 0  | 0   | 0   | 0   | 1   | 0  | 0  | 0   | 0   | 0   | 0   | 0   | 0   | 0   | 0   | 0   | 0   | 0   | 0   |
| <i>Gyrosigma acuminatum</i> (Kützing) Rabenhorst                             | 0   | 1   | 1  | 0   | 0   | 0   | 0   | 0  | 0  | 0   | 0   | 0   | 0   | 0   | 0   | 0   | 0   | 0   | 0   | 0   | 0   |
| <i>Gyrosigma kuetzingii</i> (Grunow) Cleve                                   | 0   | 0   | 0  | 2   | 1   | 1   | 0   | 0  | 1  | 0   | 0   | 0   | 2   | 1   | 3   | 0   | 2   | 0   | 3   | 1   | 1   |
| <i>Halamphora veneta</i> (Kützing) Levkov                                    | 0   | 0   | 0  | 0   | 0   | 0   | 0   | 0  | 0  | 0   | 0   | 0   | 0   | 0   | 0   | 0   | 0   | 0   | 0   | 0   | 0   |
| <i>Hantzschia abundans</i> Lange-Bertalot                                    | 0   | 0   | 0  | 0   | 0   | 0   | 0   | 0  | 0  | 0   | 0   | 0   | 0   | 0   | 1   | 0   | 0   | 0   | 0   | 0   | 0   |
| <i>Hippodonta capitata</i> (Ehrenberg) Lange-Bertalot, Metzeltin & Witkovski | 5   | 2   | 7  | 0   | 0   | 4   | 2   | 0  | 2  | 5   | 3   | 2   | 3   | 3   | 9   | 1   | 4   | 1   | 0   | 3   | 0   |
| <i>Lemnicola hungarica</i> (Grunow) Round & Basson                           | 0   | 0   | 0  | 0   | 0   | 0   | 0   | 0  | 0  | 0   | 0   | 0   | 0   | 0   | 0   | 0   | 0   | 0   | 0   | 0   | 0   |
| <i>Luticola</i> cf. <i>saprophila</i> Levkov, Metzeltin & Pavlov             | 0   | 0   | 0  | 0   | 0   | 0   | 0   | 0  | 0  | 0   | 0   | 0   | 0   | 0   | 0   | 0   | 0   | 0   | 0   | 0   | 0   |
| <i>Luticola</i> cf. <i>ventricosa</i> (Kützing) D.G. Mann                    | 0   | 0   | 0  | 0   | 0   | 0   | 0   | 0  | 0  | 0   | 0   | 0   | 0   | 0   | 0   | 0   | 0   | 0   | 0   | 0   | 0   |
| <i>Luticola</i> sp.                                                          | 0   | 0   | 0  | 0   | 0   | 0   | 0   | 0  | 0  | 0   | 0   | 0   | 0   | 0   | 0   | 0   | 0   | 0   | 0   | 0   | 0   |
| <i>Melosira varians</i> C. Agardh                                            | 0   | 0   | 0  | 0   | 0   | 0   | 0   | 0  | 0  | 0   | 0   | 0   | 1   | 0   | 0   | 0   | 0   | 0   | 0   | 0   | 0   |
| <i>Meridion circulare</i> agg.                                               | 0   | 0   | 0  | 0   | 0   | 0   | 0   | 0  | 0  | 0   | 0   | 0   | 0   | 0   | 0   | 0   | 0   | 0   | 0   | 0   | 0   |
| <i>Navicula antonii</i> Lange-Bertalot                                       | 1   | 1   | 0  | 0   | 0   | 0   | 0   | 0  | 0  | 1   | 0   | 0   | 1   | 0   | 0   | 0   | 0   | 0   | 0   | 0   | 0   |
| <i>Navicula capitatoradiata</i> Germain                                      | 249 | 112 | 59 | 159 | 202 | 228 | 190 | 2  | 26 | 13  | 14  | 28  | 13  | 23  | 12  | 17  | 20  | 47  | 18  | 57  | 49  |
| <i>Navicula</i> cf. <i>upsaliensis</i> (Grunow) Peragallo                    | 0   | 0   | 0  | 0   | 0   | 0   | 0   | 0  | 0  | 0   | 0   | 0   | 0   | 0   | 0   | 0   | 0   | 0   | 0   | 0   | 0   |
| <i>Navicula cryptocephala</i> Kützing                                        | 22  | 9   | 12 | 4   | 12  | 23  | 0   | 0  | 5  | 21  | 10  | 1   | 9   | 20  | 0   | 5   | 17  | 10  | 7   | 33  | 14  |
| <i>Navicula cryptotenella</i> Lange-Bertalot                                 | 1   | 0   | 2  | 0   | 0   | 0   | 0   | 0  | 0  | 0   | 0   | 0   | 0   | 1   | 0   | 0   | 0   | 0   | 0   | 0   | 0   |
| <i>Navicula cryptotenelloides</i> Lange-Bertalot                             | 0   | 0   | 0  | 0   | 0   | 0   | 0   | 0  | 0  | 0   | 0   | 0   | 0   | 0   | 0   | 0   | 0   | 0   | 0   | 0   | 0   |
| <i>Navicula erifuga</i> Lange-Bertalot                                       | 0   | 0   | 0  | 0   | 0   | 0   | 0   | 0  | 5  | 18  | 10  | 8   | 1   | 6   | 14  | 5   | 3   | 0   | 2   | 12  | 0   |
| <i>Navicula gregaria</i> Donkin                                              | 7   | 5   | 13 | 0   | 4   | 7   | 0   | 0  | 0  | 3   | 2   | 1   | 4   | 10  | 1   | 1   | 8   | 4   | 1   | 0   | 3   |
| <i>Navicula ingrata</i> Krasske                                              | 0   | 1   | 1  | 0   | 1   | 0   | 0   | 0  | 0  | 0   | 0   | 0   | 0   | 0   | 0   | 0   | 0   | 0   | 0   | 0   | 0   |
| <i>Navicula lacuum</i> Lange-Bertalot, G. Hofmann, Werum & Van de Viver      | 2   | 1   | 1  | 0   | 1   | 2   | 0   | 0  | 9  | 8   | 4   | 1   | 7   | 6   | 3   | 1   | 0   | 2   | 0   | 0   | 0   |
| <i>Navicula lanceolata</i> (C. Agardh) Ehrenberg                             | 0   | 0   | 0  | 0   | 0   | 0   | 0   | 0  | 0  | 0   | 0   | 0   | 0   | 0   | 0   | 0   | 0   | 0   | 0   | 0   | 0   |
| <i>Navicula menisculus</i> Schumann                                          | 0   | 0   | 1  | 0   | 0   | 1   | 0   | 0  | 1  | 4   | 1   | 0   | 0   | 0   | 0   | 2   | 0   | 0   | 0   | 0   | 0   |
| <i>Navicula meniscus</i> Schumann                                            | 0   | 0   | 0  | 0   | 0   | 0   | 0   | 0  | 0  | 0   | 0   | 0   | 0   | 0   | 0   | 0   | 0   | 0   | 0   | 2   | 0   |
| <i>Navicula reichardtiana</i> Lange-Bertalot                                 | 3   | 3   | 2  | 0   | 4   | 0   | 1   | 0  | 3  | 8   | 1   | 3   | 3   | 9   | 4   | 1   | 14  | 9   | 2   | 16  | 2   |
| <i>Navicula simulata</i> Manguin                                             | 0   | 0   | 0  | 0   | 0   | 0   | 0   | 0  | 17 | 0   | 0   | 0   | 0   | 0   | 0   | 0   | 0   | 0   | 0   | 0   | 0   |
| <i>Navicula slesvicensis</i> Grunow                                          | 0   | 0   | 0  | 0   | 0   | 1   | 0   | 0  | 0  | 0   | 2   | 0   | 0   | 0   | 1   | 0   | 0   | 0   | 1   | 0   | 1   |
| <i>Navicula tenelloides</i> Hustedt                                          | 0   | 0   | 0  | 0   | 0   | 0   | 0   | 0  | 0  | 0   | 0   | 0   | 0   | 0   | 0   | 0   | 0   | 0   | 0   | 0   | 0   |
| <i>Navicula tripunctata</i> (O.F. Müller) Bory                               | 0   | 0   | 0  | 0   | 0   | 0   | 0   | 0  | 0  | 0   | 0   | 0   | 0   | 0   | 0   | 0   | 0   | 0   | 0   | 0   | 0   |
| <i>Navicula trivialis</i> Lange-Bertalot                                     | 0   | 0   | 2  | 0   | 0   | 1   | 0   | 1  | 7  | 32  | 21  | 10  | 6   | 11  | 9   | 3   | 16  | 13  | 2   | 25  | 6   |

| year 2015                                           | F1 | F2 | F3 | F4 | F5 | F6 | F7 | F8 | B9 | B10 | B11 | B12 | B13 | B14 | B15 | B16 | B17 | D18 | D19 | D20 | D21 |
|-----------------------------------------------------|----|----|----|----|----|----|----|----|----|-----|-----|-----|-----|-----|-----|-----|-----|-----|-----|-----|-----|
| <i>Navicula upsaliensis</i> (Grunow) Peragallo      | 0  | 0  | 0  | 0  | 0  | 0  | 0  | 0  | 0  | 0   | 0   | 0   | 0   | 0   | 2   | 0   | 0   | 0   | 0   | 0   | 0   |
| <i>Navicula viridula</i> (Kützing) Ehrenberg        | 0  | 0  | 0  | 0  | 0  | 0  | 0  | 0  | 3  | 0   | 0   | 0   | 0   | 0   | 0   | 0   | 0   | 0   | 0   | 0   | 0   |
| <i>Neidium dubium</i> (Ehrenberg) Cleve             | 0  | 0  | 0  | 0  | 0  | 0  | 0  | 0  | 0  | 0   | 0   | 0   | 1   | 1   | 1   | 0   | 0   | 0   | 0   | 0   | 0   |
| <i>Neidium</i> sp.                                  | 0  | 0  | 0  | 0  | 0  | 0  | 0  | 0  | 0  | 0   | 0   | 0   | 0   | 0   | 0   | 0   | 0   | 0   | 0   | 0   | 0   |
| <i>Nitzschia acicularis</i> (Kützing) W. Smith      | 0  | 0  | 0  | 0  | 0  | 0  | 0  | 0  | 0  | 0   | 0   | 0   | 0   | 0   | 0   | 0   | 0   | 0   | 0   | 0   | 0   |
| <i>Nitzschia amphibia</i> Grunow                    | 0  | 0  | 1  | 0  | 0  | 0  | 0  | 0  | 1  | 1   | 0   | 1   | 0   | 1   | 0   | 0   | 1   | 0   | 0   | 0   | 0   |
| <i>Nitzschia archibaldii</i> Lange-Bertalot         | 29 | 87 | 25 | 0  | 20 | 11 | 0  | 0  | 2  | 12  | 3   | 4   | 4   | 12  | 3   | 1   | 19  | 21  | 5   | 32  | 14  |
| <i>Nitzschia dissipata</i> (Kützing) Grunow         | 0  | 3  | 4  | 0  | 0  | 2  | 4  | 0  | 2  | 4   | 2   | 1   | 4   | 0   | 1   | 0   | 0   | 3   | 1   | 3   | 1   |
| <i>Nitzschia filiformis</i> (W. Smith) Van Heurck   | 0  | 0  | 0  | 0  | 0  | 0  | 0  | 0  | 0  | 0   | 0   | 0   | 0   | 0   | 0   | 0   | 0   | 0   | 0   | 0   | 0   |
| <i>Nitzschia linearis</i> (C. Agardh) W. Smith      | 3  | 0  | 0  | 0  | 0  | 0  | 0  | 0  | 0  | 0   | 1   | 0   | 0   | 0   | 0   | 0   | 2   | 0   | 0   | 0   | 0   |
| <i>Nitzschia palea</i> (Kützing) W. Smith           | 39 | 30 | 56 | 3  | 43 | 52 | 0  | 0  | 6  | 72  | 30  | 6   | 7   | 64  | 18  | 3   | 42  | 53  | 2   | 72  | 43  |
| <i>Nitzschia paleacea</i> (Grunow) Grunow           | 0  | 0  | 0  | 0  | 0  | 0  | 0  | 0  | 0  | 0   | 0   | 0   | 0   | 0   | 0   | 0   | 0   | 0   | 0   | 0   | 0   |
| <i>Nitzschia perminuta</i> (Grunow) M. Peragallo    | 0  | 0  | 0  | 0  | 0  | 0  | 0  | 0  | 0  | 0   | 0   | 0   | 0   | 0   | 0   | 0   | 0   | 0   | 0   | 0   | 0   |
| <i>Nitzschia pumila</i> Hustedt                     | 0  | 3  | 0  | 0  | 1  | 0  | 0  | 0  | 0  | 0   | 0   | 0   | 0   | 0   | 0   | 0   | 1   | 1   | 0   | 0   | 0   |
| <i>Nitzschia recta</i> Hantzsch                     | 0  | 0  | 2  | 0  | 1  | 2  | 0  | 0  | 0  | 0   | 0   | 0   | 0   | 0   | 0   | 0   | 1   | 3   | 0   | 1   | 2   |
| <i>Nitzschia solgensis</i> Cleve-Euler              | 0  | 0  | 0  | 0  | 0  | 0  | 0  | 0  | 0  | 0   | 0   | 0   | 0   | 0   | 0   | 0   | 0   | 0   | 0   | 1   | 0   |
| <i>Nitzschia subacicularis</i> Hustedt              | 0  | 0  | 0  | 0  | 0  | 0  | 0  | 0  | 0  | 0   | 0   | 0   | 0   | 0   | 0   | 0   | 0   | 0   | 0   | 0   | 0   |
| <i>Nitzschia</i> sp.                                | 0  | 0  | 0  | 0  | 0  | 0  | 0  | 0  | 0  | 0   | 0   | 0   | 0   | 0   | 0   | 0   | 0   | 0   | 0   | 0   | 0   |
| <i>Pinnularia borealis</i> Ehrenberg                | 0  | 0  | 0  | 0  | 0  | 0  | 0  | 0  | 0  | 1   | 0   | 0   | 0   | 0   | 0   | 0   | 0   | 0   | 0   | 0   | 0   |
| <i>Pinnularia brebissonii</i> (Kützing) Rabenhorst  | 0  | 0  | 1  | 0  | 0  | 0  | 0  | 0  | 0  | 0   | 0   | 0   | 0   | 0   | 0   | 0   | 0   | 0   | 0   | 0   | 0   |
| <i>Pinnularia dornii</i> Metzeltin                  | 0  | 0  | 0  | 0  | 0  | 0  | 0  | 0  | 0  | 0   | 0   | 0   | 0   | 0   | 0   | 0   | 0   | 0   | 0   | 0   | 0   |
| <i>Pinnularia gibba</i> Ehrenberg                   | 0  | 0  | 0  | 0  | 0  | 0  | 0  | 0  | 0  | 0   | 0   | 0   | 0   | 0   | 0   | 0   | 0   | 0   | 0   | 0   | 0   |
| <i>Pinnularia grunowii</i> Krammer                  | 0  | 0  | 0  | 0  | 0  | 0  | 0  | 0  | 0  | 0   | 0   | 0   | 0   | 0   | 0   | 0   | 0   | 0   | 0   | 0   | 0   |
| <i>Pinnularia isselana</i> Krammer                  | 0  | 0  | 0  | 0  | 0  | 0  | 0  | 0  | 0  | 0   | 0   | 0   | 0   | 0   | 0   | 0   | 0   | 0   | 0   | 0   | 0   |
| <i>Pinnularia marchia</i> I. Schönfelder ex Krammer | 0  | 0  | 0  | 0  | 0  | 0  | 0  | 0  | 0  | 0   | 0   | 0   | 0   | 0   | 0   | 0   | 0   | 0   | 0   | 0   | 0   |
| <i>Pinnularia neomajor</i> Krammer                  | 0  | 0  | 0  | 0  | 0  | 0  | 0  | 0  | 0  | 0   | 0   | 0   | 0   | 0   | 0   | 0   | 0   | 0   | 0   | 0   | 0   |
| <i>Pinnularia obscura</i> Krasske                   | 0  | 0  | 0  | 0  | 0  | 0  | 0  | 0  | 0  | 0   | 0   | 0   | 0   | 0   | 0   | 0   | 0   | 0   | 0   | 0   | 0   |
| <i>Pinnularia pseudogibba</i> Krammer               | 0  | 0  | 0  | 0  | 0  | 0  | 0  | 0  | 0  | 0   | 0   | 0   | 0   | 0   | 0   | 0   | 0   | 0   | 0   | 0   | 0   |
| <i>Pinnularia schoenfelderii</i> Krammer            | 0  | 0  | 0  | 0  | 0  | 0  | 0  | 0  | 0  | 0   | 2   | 0   | 1   | 0   | 0   | 1   | 1   | 0   | 0   | 0   | 0   |
| <i>Pinnularia sinistra</i> Krammer                  | 0  | 0  | 0  | 0  | 0  | 0  | 0  | 0  | 0  | 0   | 0   | 0   | 0   | 0   | 0   | 0   | 0   | 0   | 0   | 0   | 0   |
| <i>Pinnularia subcapitata</i> Gregory               | 0  | 0  | 0  | 0  | 0  | 0  | 0  | 0  | 0  | 0   | 0   | 0   | 0   | 0   | 0   | 0   | 0   | 0   | 0   | 0   | 0   |
| <i>Pinnularia subgibba</i> Krammer                  | 0  | 0  | 0  | 0  | 0  | 0  | 0  | 0  | 0  | 0   | 0   | 0   | 0   | 0   | 0   | 0   | 0   | 0   | 0   | 0   | 0   |
| <i>Pinnularia viridiformis</i> Krammer              | 0  | 0  | 0  | 0  | 0  | 0  | 0  | 1  | 0  | 0   | 0   | 0   | 0   | 1   | 0   | 0   | 1   | 0   | 0   | 0   | 0   |

| year 2015                                                                    | F1 | F2 | F3 | F4 | F5 | F6 | F7 | F8  | B9  | B10 | B11 | B12 | B13 | B14 | B15 | B16 | B17 | D18 | D19 | D20 | D21 |
|------------------------------------------------------------------------------|----|----|----|----|----|----|----|-----|-----|-----|-----|-----|-----|-----|-----|-----|-----|-----|-----|-----|-----|
| <i>Placoneis anglica</i> (Ralfs) E.J.Cox                                     | 0  | 0  | 0  | 0  | 0  | 2  | 0  | 0   | 4   | 6   | 5   | 3   | 8   | 3   | 5   | 0   | 1   | 0   | 0   | 0   | 0   |
| <i>Placoneis clementioides</i> (Hustedt) Cox                                 | 5  | 7  | 8  | 4  | 4  | 7  | 3  | 0   | 7   | 4   | 2   | 3   | 15  | 8   | 6   | 5   | 4   | 0   | 0   | 0   | 0   |
| <i>Placoneis clementis</i> (Grunow) Cox                                      | 0  | 0  | 0  | 0  | 0  | 1  | 0  | 0   | 1   | 0   | 0   | 0   | 0   | 0   | 0   | 0   | 0   | 0   | 0   | 0   | 0   |
| <i>Placoneis paraelginensis</i> Lange-Bertalot                               | 0  | 0  | 0  | 0  | 0  | 0  | 0  | 0   | 3   | 0   | 0   | 0   | 0   | 0   | 0   | 0   | 0   | 0   | 0   | 0   | 0   |
| <i>Placoneis placentula</i> (Ehrenberg) Heinzerling                          | 0  | 0  | 0  | 0  | 0  | 0  | 0  | 0   | 0   | 0   | 0   | 0   | 0   | 0   | 0   | 0   | 0   | 0   | 0   | 0   | 0   |
| <i>Placoneis pseudanglica</i> (Lange-Bertalot) Cox                           | 0  | 0  | 0  | 0  | 0  | 0  | 0  | 0   | 0   | 0   | 0   | 0   | 0   | 0   | 0   | 0   | 0   | 0   | 0   | 0   | 0   |
| <i>Placoneis</i> sp.                                                         | 0  | 0  | 0  | 0  | 0  | 0  | 0  | 0   | 0   | 0   | 0   | 0   | 0   | 0   | 0   | 0   | 0   | 0   | 0   | 0   | 0   |
| <i>Planothidium</i> cf. <i>dau</i> i (Foged) Lange-Bertalot                  | 0  | 0  | 1  | 0  | 0  | 0  | 1  | 0   | 0   | 0   | 0   | 0   | 0   | 0   | 0   | 0   | 0   | 0   | 0   | 0   | 0   |
| <i>Planothidium delicatulum</i> (Kützing) Round & Bukhtiyarova               | 0  | 0  | 0  | 0  | 0  | 0  | 0  | 0   | 0   | 0   | 0   | 0   | 0   | 0   | 0   | 0   | 0   | 0   | 0   | 0   | 0   |
| <i>Planothidium frequentissimum</i> (Lange-Bertalot) Lange-Bertalot          | 2  | 2  | 4  | 2  | 2  | 0  | 0  | 1   | 0   | 0   | 0   | 0   | 0   | 3   | 2   | 0   | 10  | 1   | 0   | 3   | 5   |
| <i>Planothidium lanceolatum</i> (Brébisson ex Kützing) Lange-Bertalot        | 0  | 0  | 0  | 0  | 1  | 0  | 0  | 0   | 1   | 0   | 0   | 0   | 1   | 6   | 0   | 0   | 1   | 1   | 0   | 0   | 9   |
| <i>Pseudostaurosira brevistriata</i> (Grunow) Williams & Round               | 14 | 26 | 35 | 36 | 5  | 39 | 47 | 229 | 15  | 9   | 23  | 31  | 41  | 19  | 39  | 79  | 43  | 23  | 39  | 30  | 45  |
| <i>Pseudostaurosira elliptica</i> (Schumann) Edlund, Morales & Spaulding     | 0  | 3  | 19 | 31 | 2  | 14 | 13 | 34  | 160 | 122 | 178 | 218 | 264 | 160 | 212 | 143 | 127 | 213 | 210 | 125 | 99  |
| <i>Puncticulata balatonis</i> (Pantocsek) Wojtal & Budzy                     | 30 | 10 | 27 | 20 | 11 | 28 | 29 | 24  | 22  | 5   | 4   | 5   | 7   | 7   | 8   | 24  | 15  | 10  | 21  | 20  | 17  |
| <i>Rhoicosphenia abbreviata</i> (C. Agardh) Lange-Bertalot                   | 0  | 0  | 0  | 0  | 0  | 0  | 0  | 0   | 0   | 0   | 0   | 0   | 0   | 0   | 0   | 0   | 0   | 0   | 0   | 0   | 0   |
| <i>Rosithidium petersenii</i> (Hustedt) Round & Bukhtiyarova                 | 0  | 0  | 0  | 0  | 0  | 0  | 0  | 0   | 0   | 0   | 0   | 0   | 0   | 0   | 0   | 0   | 0   | 0   | 0   | 0   | 0   |
| <i>Sellaphora bacillum</i> (Ehrenberg) D.G.Mann                              | 0  | 3  | 2  | 0  | 0  | 0  | 0  | 0   | 3   | 0   | 0   | 0   | 0   | 1   | 0   | 0   | 0   | 0   | 0   | 0   | 0   |
| <i>Sellaphora pupula</i> (Kützing) Mereschkovsky                             | 4  | 9  | 9  | 0  | 5  | 9  | 2  | 0   | 1   | 29  | 14  | 3   | 14  | 6   | 4   | 0   | 1   | 1   | 0   | 6   | 0   |
| <i>Stauroneis leguminopsis</i> Lange-Bertalot & Krammer                      | 0  | 0  | 1  | 0  | 0  | 0  | 0  | 0   | 0   | 0   | 0   | 0   | 0   | 0   | 0   | 0   | 0   | 0   | 0   | 0   | 0   |
| <i>Stauroneis</i> sp.                                                        | 0  | 0  | 0  | 0  | 0  | 0  | 0  | 0   | 0   | 0   | 0   | 0   | 0   | 0   | 0   | 0   | 0   | 0   | 0   | 0   | 0   |
| <i>Stauroneis subgracilis</i> Lange-Bertalot et Krammer                      | 0  | 0  | 0  | 0  | 0  | 0  | 0  | 0   | 0   | 0   | 0   | 0   | 0   | 0   | 0   | 0   | 0   | 0   | 0   | 0   | 0   |
| <i>Staurosira binodis</i> (Ehrenberg) Lange-Bertalot                         | 2  | 5  | 2  | 3  | 0  | 0  | 9  | 6   | 13  | 6   | 11  | 6   | 11  | 2   | 7   | 10  | 3   | 0   | 3   | 5   | 1   |
| <i>Staurosira</i> cf. <i>venter</i> (Ehrenberg) Grunow                       | 0  | 0  | 0  | 0  | 0  | 0  | 0  | 0   | 0   | 0   | 0   | 0   | 0   | 0   | 0   | 0   | 0   | 0   | 0   | 0   | 0   |
| <i>Staurosira construens</i> Ehrenberg                                       | 0  | 1  | 0  | 4  | 0  | 2  | 1  | 2   | 4   | 4   | 5   | 2   | 4   | 2   | 4   | 4   | 1   | 0   | 0   | 0   | 3   |
| <i>Staurosirella leptostauron</i> var. <i>dubia</i> (Grunow) M.B. Edlund     | 39 | 44 | 53 | 75 | 23 | 24 | 45 | 137 | 44  | 16  | 33  | 43  | 53  | 33  | 35  | 97  | 74  | 27  | 66  | 43  | 48  |
| <i>Stephanodiscus hantzschii</i> Grunow                                      | 4  | 0  | 2  | 1  | 1  | 0  | 0  | 0   | 0   | 0   | 0   | 0   | 0   | 0   | 0   | 0   | 0   | 3   | 0   | 1   | 0   |
| <i>Surirella angusta</i> Kützing                                             | 0  | 0  | 0  | 0  | 0  | 0  | 0  | 0   | 0   | 1   | 0   | 0   | 0   | 0   | 0   | 0   | 0   | 0   | 0   | 0   | 0   |
| <i>Surirella brebissonii</i> Krammer & Lange-Bertalot                        | 0  | 0  | 1  | 0  | 0  | 0  | 0  | 0   | 0   | 0   | 0   | 0   | 0   | 3   | 0   | 0   | 1   | 0   | 0   | 1   | 0   |
| <i>Surirella minuta</i> Brébisson                                            | 0  | 0  | 0  | 0  | 0  | 0  | 0  | 0   | 0   | 0   | 0   | 0   | 0   | 1   | 0   | 0   | 0   | 0   | 0   | 0   | 0   |
| <i>Tryblionella salinarum</i> (Grunow) Pantocsek                             | 0  | 1  | 0  | 0  | 0  | 0  | 0  | 0   | 0   | 0   | 0   | 0   | 0   | 0   | 0   | 0   | 0   | 0   | 0   | 0   | 0   |
| <i>Ulnaria acus</i> (Kützing) Aboal                                          | 0  | 0  | 0  | 0  | 0  | 0  | 0  | 0   | 0   | 0   | 0   | 0   | 0   | 0   | 0   | 0   | 0   | 0   | 0   | 0   | 0   |
| <i>Ulnaria grunowii</i> (Lange-Bertalot & Ulrich) Cantonati & Lange-Bertalot | 0  | 0  | 0  | 0  | 0  | 0  | 0  | 0   | 0   | 0   | 0   | 0   | 0   | 0   | 0   | 0   | 0   | 0   | 0   | 0   | 0   |
| <i>Ulnaria ulna</i> (Nitzsch) P.Compère                                      | 0  | 0  | 0  | 0  | 0  | 0  | 0  | 1   | 0   | 0   | 1   | 1   | 0   | 0   | 2   | 0   | 1   | 1   | 3   | 0   | 2   |

| year 2016                              | F1-16                           | F2-16              | F3-16                       | F4-16                  | F5-16                 | F6-16                      | F7-16                           | F8-16              | F9-16                       | F10-16                   | F11-16               | B12-16                      | B13-16                      | B14-16                     | B15-16                      | B16-16             | B17-16                 | B18-16                       | B19-16                       | B20-16                             | B21-16                     | B22-16               | B23-16                | B24-16                     | B25-16                      | B26-16                        | B27-16                    | B28-16                     | B29-16                     |
|----------------------------------------|---------------------------------|--------------------|-----------------------------|------------------------|-----------------------|----------------------------|---------------------------------|--------------------|-----------------------------|--------------------------|----------------------|-----------------------------|-----------------------------|----------------------------|-----------------------------|--------------------|------------------------|------------------------------|------------------------------|------------------------------------|----------------------------|----------------------|-----------------------|----------------------------|-----------------------------|-------------------------------|---------------------------|----------------------------|----------------------------|
|                                        | <i>Bolboschoenus laticarpus</i> | <i>Carex acuta</i> | <i>Phalaris arundinacea</i> | <i>Glyceria maxima</i> | <i>Salix triandra</i> | <i>Persicaria amphibia</i> | <i>Bolboschoenus laticarpus</i> | <i>Lemna gibba</i> | <i>Spirodela polyrrhiza</i> | <i>Lythrum salicaria</i> | <i>Poa palustris</i> | <i>Phragmites australis</i> | <i>Phalaris arundinacea</i> | <i>Alopecurus aequalis</i> | <i>Spirodela polyrrhiza</i> | <i>Lemna gibba</i> | <i>Glyceria maxima</i> | <i>Ranunculus sceleratus</i> | <i>Persicaria hydropiper</i> | <i>Veronica anagallis-aquatica</i> | <i>Persicaria amphibia</i> | <i>Poa palustris</i> | <i>Juncus effusus</i> | <i>Ranunculus flammula</i> | <i>Agrostis stolonifera</i> | <i>Alopecurus geniculatus</i> | <i>Juncus articulatus</i> | <i>Veronica scutellata</i> | <i>Potamogeton crispus</i> |
| <i>Achnanthes</i> sp.                  | 0                               | 0                  | 0                           | 0                      | 0                     | 0                          | 0                               | 0                  | 1                           | 0                        | 0                    | 0                           | 0                           | 0                          | 0                           | 0                  | 0                      | 0                            | 2                            | 0                                  | 0                          | 0                    | 0                     | 0                          | 0                           | 0                             | 0                         | 0                          | 0                          |
| <i>Achnanthidium catenatum</i>         | 0                               | 0                  | 0                           | 0                      | 0                     | 0                          | 0                               | 0                  | 0                           | 0                        | 0                    | 0                           | 0                           | 0                          | 0                           | 0                  | 0                      | 0                            | 0                            | 0                                  | 0                          | 0                    | 0                     | 0                          | 0                           | 0                             | 0                         | 0                          | 0                          |
| <i>Achnanthidium</i> cf. <i>affine</i> | 0                               | 0                  | 0                           | 0                      | 0                     | 0                          | 0                               | 0                  | 0                           | 0                        | 0                    | 0                           | 6                           | 1                          | 0                           | 0                  | 0                      | 0                            | 0                            | 0                                  | 0                          | 0                    | 0                     | 0                          | 0                           | 0                             | 0                         | 0                          | 0                          |
| <i>Achnanthidium minutissimum</i>      | 31                              | 42                 | 56                          | 76                     | 33                    | 21                         | 93                              | 5                  | 13                          | 95                       | 179                  | 83                          | 4                           | 8                          | 1                           | 16                 | 3                      | 3                            | 1                            | 1                                  | 1                          | 2                    | 1                     | 0                          | 1                           | 0                             | 1                         | 0                          | 0                          |
| <i>Achnanthidium saprophilum</i>       | 147                             | 49                 | 42                          | 10                     | 65                    | 38                         | 139                             | 6                  | 11                          | 108                      | 89                   | 32                          | 12                          | 3                          | 1                           | 0                  | 7                      | 2                            | 5                            | 12                                 | 2                          | 66                   | 2                     | 4                          | 6                           | 4                             | 35                        | 6                          | 0                          |
| <i>Adlafia minuscula</i>               | 0                               | 0                  | 0                           | 0                      | 0                     | 0                          | 0                               | 0                  | 0                           | 0                        | 0                    | 0                           | 0                           | 0                          | 0                           | 0                  | 0                      | 0                            | 0                            | 0                                  | 0                          | 0                    | 0                     | 0                          | 0                           | 0                             | 0                         | 0                          | 0                          |
| <i>Amphora copulata</i>                | 0                               | 0                  | 0                           | 0                      | 0                     | 0                          | 0                               | 0                  | 0                           | 0                        | 0                    | 0                           | 0                           | 0                          | 0                           | 0                  | 0                      | 0                            | 0                            | 0                                  | 0                          | 0                    | 0                     | 0                          | 0                           | 0                             | 0                         | 0                          | 0                          |
| <i>Amphora lange-bertalotii</i>        | 0                               | 0                  | 0                           | 0                      | 0                     | 0                          | 0                               | 0                  | 0                           | 0                        | 0                    | 0                           | 0                           | 0                          | 0                           | 0                  | 3                      | 1                            | 3                            | 0                                  | 0                          | 0                    | 1                     | 0                          | 0                           | 0                             | 0                         | 0                          | 0                          |
| <i>Amphora ovalis</i>                  | 0                               | 0                  | 1                           | 0                      | 0                     | 0                          | 0                               | 0                  | 0                           | 0                        | 0                    | 0                           | 0                           | 0                          | 0                           | 0                  | 0                      | 0                            | 0                            | 0                                  | 0                          | 1                    | 0                     | 0                          | 0                           | 0                             | 0                         | 0                          | 0                          |
| <i>Amphora pediculus</i>               | 0                               | 0                  | 0                           | 1                      | 0                     | 0                          | 0                               | 0                  | 0                           | 0                        | 0                    | 0                           | 0                           | 0                          | 0                           | 0                  | 0                      | 0                            | 0                            | 0                                  | 0                          | 0                    | 0                     | 0                          | 0                           | 0                             | 0                         | 0                          | 0                          |
| <i>Anomoeoneis sphaerophora</i>        | 0                               | 0                  | 0                           | 0                      | 0                     | 0                          | 0                               | 0                  | 0                           | 0                        | 0                    | 0                           | 0                           | 0                          | 0                           | 0                  | 2                      | 0                            | 0                            | 0                                  | 0                          | 0                    | 0                     | 0                          | 0                           | 0                             | 0                         | 0                          | 0                          |
| <i>Asterionella formosa</i>            | 0                               | 0                  | 0                           | 1                      | 0                     | 0                          | 0                               | 0                  | 0                           | 0                        | 0                    | 0                           | 0                           | 0                          | 0                           | 0                  | 0                      | 0                            | 0                            | 0                                  | 0                          | 0                    | 0                     | 0                          | 0                           | 0                             | 0                         | 0                          | 0                          |
| <i>Aulacoseira ambigua</i>             | 6                               | 7                  | 20                          | 48                     | 8                     | 24                         | 0                               | 13                 | 27                          | 10                       | 10                   | 21                          | 0                           | 6                          | 0                           | 13                 | 2                      | 5                            | 5                            | 13                                 | 7                          | 4                    | 2                     | 1                          | 11                          | 0                             | 2                         | 0                          | 10                         |
| <i>Aulacoseira muzzanensis</i>         | 0                               | 0                  | 0                           | 0                      | 0                     | 0                          | 0                               | 0                  | 0                           | 0                        | 0                    | 0                           | 0                           | 0                          | 0                           | 0                  | 0                      | 0                            | 1                            | 0                                  | 0                          | 0                    | 0                     | 0                          | 0                           | 0                             | 0                         | 0                          | 0                          |
| <i>Aulacoseira</i> sp.                 | 1                               | 0                  | 0                           | 0                      | 0                     | 2                          | 0                               | 0                  | 0                           | 0                        | 2                    | 0                           | 0                           | 0                          | 0                           | 0                  | 1                      | 1                            | 0                            | 2                                  | 0                          | 2                    | 1                     | 0                          | 0                           | 6                             | 0                         | 0                          | 0                          |
| <i>Caloneis lancettula</i>             | 0                               | 0                  | 0                           | 0                      | 0                     | 0                          | 0                               | 0                  | 0                           | 0                        | 0                    | 0                           | 0                           | 0                          | 0                           | 0                  | 0                      | 0                            | 0                            | 0                                  | 0                          | 0                    | 0                     | 0                          | 0                           | 0                             | 0                         | 0                          | 0                          |
| <i>Caloneis silicula</i>               | 0                               | 0                  | 0                           | 1                      | 0                     | 0                          | 0                               | 0                  | 0                           | 0                        | 0                    | 0                           | 0                           | 0                          | 0                           | 0                  | 0                      | 0                            | 0                            | 0                                  | 0                          | 0                    | 0                     | 0                          | 0                           | 0                             | 0                         | 0                          | 0                          |
| <i>Cocconeis pediculus</i>             | 0                               | 0                  | 0                           | 0                      | 0                     | 0                          | 0                               | 0                  | 0                           | 0                        | 0                    | 0                           | 0                           | 0                          | 0                           | 0                  | 0                      | 0                            | 0                            | 0                                  | 0                          | 0                    | 0                     | 0                          | 0                           | 0                             | 0                         | 0                          | 0                          |
| <i>Cocconeis placentula</i>            | 185                             | 95                 | 71                          | 106                    | 82                    | 62                         | 21                              | 1                  | 1                           | 42                       | 42                   | 2                           | 1                           | 12                         | 0                           | 0                  | 7                      | 1                            | 4                            | 1                                  | 0                          | 0                    | 1                     | 0                          | 0                           | 0                             | 0                         | 0                          | 111                        |
| <i>Craticula ambigua</i>               | 0                               | 0                  | 0                           | 0                      | 0                     | 0                          | 0                               | 0                  | 0                           | 0                        | 0                    | 0                           | 0                           | 0                          | 0                           | 0                  | 0                      | 0                            | 0                            | 0                                  | 0                          | 0                    | 0                     | 0                          | 0                           | 0                             | 0                         | 0                          | 0                          |
| <i>Craticula</i> cf. <i>halophila</i>  | 0                               | 0                  | 0                           | 0                      | 0                     | 0                          | 0                               | 0                  | 0                           | 0                        | 0                    | 0                           | 0                           | 0                          | 0                           | 0                  | 0                      | 0                            | 0                            | 0                                  | 0                          | 0                    | 0                     | 0                          | 0                           | 0                             | 0                         | 0                          | 0                          |
| <i>Craticula cuspidata</i>             | 0                               | 0                  | 0                           | 0                      | 0                     | 0                          | 0                               | 0                  | 0                           | 0                        | 0                    | 0                           | 0                           | 0                          | 0                           | 0                  | 0                      | 0                            | 0                            | 0                                  | 0                          | 0                    | 0                     | 0                          | 0                           | 0                             | 0                         | 0                          | 0                          |
| <i>Craticula</i> sp.                   | 0                               | 0                  | 0                           | 0                      | 0                     | 0                          | 0                               | 0                  | 0                           | 0                        | 1                    | 0                           | 0                           | 0                          | 0                           | 0                  | 0                      | 0                            | 0                            | 0                                  | 0                          | 1                    | 1                     | 0                          | 1                           | 0                             | 0                         | 0                          | 0                          |
| <i>Craticula subminuscula</i>          | 0                               | 8                  | 4                           | 2                      | 10                    | 3                          | 8                               | 1                  | 0                           | 0                        | 0                    | 85                          | 86                          | 0                          | 0                           | 0                  | 10                     | 1                            | 2                            | 0                                  | 5                          | 2                    | 0                     | 0                          | 0                           | 0                             | 1                         | 0                          | 0                          |
| <i>Cyclostephanos dubius</i>           | 0                               | 0                  | 0                           | 2                      | 0                     | 1                          | 0                               | 0                  | 0                           | 1                        | 0                    | 0                           | 0                           | 2                          | 0                           | 0                  | 3                      | 2                            | 0                            | 1                                  | 5                          | 0                    | 4                     | 0                          | 0                           | 1                             | 2                         | 5                          | 5                          |
| <i>Cyclotella atomus</i>               | 0                               | 0                  | 0                           | 0                      | 0                     | 0                          | 0                               | 0                  | 0                           | 0                        | 0                    | 0                           | 0                           | 0                          | 0                           | 0                  | 0                      | 1                            | 0                            | 0                                  | 0                          | 0                    | 11                    | 1                          | 0                           | 0                             | 0                         | 0                          | 0                          |

| year 2016                          | F1 | F2 | F3 | F4 | F5 | F6 | F7 | F8 | F9 | F10 | F11 | B12 | B13 | B14 | B15 | B16 | B17 | B18 | B19 | B20 | B21 | B22 | B23 | B24 | B25 | B26 | B27 | B28 | B29 |
|------------------------------------|----|----|----|----|----|----|----|----|----|-----|-----|-----|-----|-----|-----|-----|-----|-----|-----|-----|-----|-----|-----|-----|-----|-----|-----|-----|-----|
| <i>Cyclotella meneghiniana</i>     | 0  | 0  | 0  | 1  | 0  | 0  | 0  | 0  | 0  | 0   | 0   | 1   | 0   | 16  | 3   | 5   | 2   | 2   | 3   | 7   | 13  | 25  | 6   | 47  | 3   | 4   | 11  | 8   | 0   |
| <i>Cymatopleura solea</i>          | 0  | 0  | 0  | 0  | 0  | 0  | 0  | 0  | 0  | 0   | 0   | 0   | 0   | 0   | 0   | 0   | 0   | 1   | 0   | 0   | 0   | 0   | 0   | 0   | 0   | 0   | 0   | 0   | 0   |
| <i>Cymbella cf. subcistula</i>     | 0  | 0  | 0  | 0  | 0  | 0  | 0  | 0  | 0  | 0   | 0   | 0   | 0   | 0   | 0   | 0   | 0   | 0   | 0   | 0   | 0   | 0   | 0   | 0   | 0   | 0   | 0   | 0   | 0   |
| <i>Cymbella neocistula</i>         | 0  | 0  | 0  | 0  | 0  | 0  | 0  | 0  | 0  | 0   | 0   | 0   | 0   | 0   | 0   | 0   | 0   | 0   | 0   | 0   | 0   | 0   | 0   | 0   | 0   | 0   | 0   | 0   | 0   |
| <i>Cymbella sp.</i>                | 0  | 0  | 0  | 0  | 0  | 0  | 0  | 0  | 0  | 0   | 0   | 0   | 0   | 0   | 0   | 0   | 0   | 0   | 1   | 0   | 0   | 0   | 0   | 0   | 0   | 0   | 0   | 0   | 0   |
| <i>Discostella pseudosteliger</i>  | 0  | 0  | 0  | 0  | 0  | 0  | 0  | 0  | 0  | 0   | 0   | 0   | 0   | 1   | 0   | 0   | 0   | 0   | 0   | 0   | 0   | 0   | 0   | 0   | 0   | 0   | 0   | 0   | 0   |
| <i>Encyonema auerswaldii</i>       | 1  | 0  | 0  | 0  | 0  | 0  | 0  | 0  | 0  | 1   | 8   | 0   | 0   | 0   | 0   | 0   | 0   | 0   | 0   | 0   | 0   | 0   | 0   | 0   | 0   | 0   | 0   | 0   | 0   |
| <i>Encyonema minutum</i> agg.      | 7  | 21 | 19 | 7  | 9  | 35 | 7  | 1  | 0  | 11  | 15  | 9   | 15  | 2   | 0   | 6   | 6   | 1   | 1   | 2   | 8   | 0   | 0   | 0   | 0   | 0   | 0   | 0   | 33  |
| <i>Epithemia sp.</i>               | 0  | 0  | 0  | 0  | 0  | 0  | 0  | 0  | 0  | 0   | 0   | 0   | 0   | 0   | 0   | 0   | 1   | 0   | 0   | 0   | 0   | 0   | 0   | 0   | 0   | 0   | 0   | 0   | 0   |
| <i>Eunotia bidens</i>              | 0  | 0  | 0  | 0  | 0  | 0  | 0  | 0  | 0  | 0   | 0   | 0   | 0   | 0   | 0   | 0   | 0   | 0   | 0   | 0   | 0   | 0   | 0   | 1   | 0   | 0   | 0   | 0   | 0   |
| <i>Eunotia bilunaris</i>           | 0  | 0  | 0  | 0  | 0  | 0  | 0  | 0  | 0  | 0   | 0   | 0   | 0   | 1   | 0   | 0   | 19  | 160 | 85  | 46  | 1   | 0   | 13  | 1   | 4   | 0   | 0   | 3   | 0   |
| <i>Eunotia sp.</i>                 | 0  | 0  | 0  | 0  | 0  | 0  | 0  | 0  | 0  | 0   | 0   | 0   | 0   | 0   | 0   | 0   | 0   | 0   | 0   | 0   | 0   | 0   | 0   | 4   | 0   | 0   | 0   | 0   | 0   |
| <i>Fallacia pygmaea</i>            | 0  | 0  | 0  | 0  | 0  | 0  | 0  | 0  | 0  | 0   | 0   | 0   | 0   | 0   | 0   | 0   | 1   | 0   | 0   | 0   | 0   | 0   | 0   | 0   | 0   | 0   | 0   | 0   | 0   |
| <i>Fistuliifera saprophila</i>     | 0  | 1  | 6  | 14 | 36 | 7  | 8  | 1  | 5  | 0   | 0   | 9   | 96  | 1   | 1   | 7   | 0   | 6   | 1   | 0   | 1   | 0   | 0   | 2   | 1   | 0   | 1   | 0   | 0   |
| <i>Fragilaria capucina</i>         | 0  | 1  | 0  | 9  | 0  | 2  | 0  | 1  | 0  | 0   | 2   | 0   | 9   | 3   | 0   | 0   | 0   | 7   | 2   | 4   | 0   | 1   | 3   | 2   | 1   | 0   | 0   | 1   | 0   |
| <i>Fragilaria gracilis</i>         | 0  | 0  | 0  | 0  | 0  | 0  | 0  | 0  | 0  | 0   | 0   | 0   | 0   | 0   | 0   | 0   | 0   | 0   | 0   | 1   | 0   | 0   | 0   | 0   | 0   | 0   | 2   | 0   | 0   |
| <i>Fragilaria perdelicatissima</i> | 0  | 0  | 0  | 0  | 0  | 0  | 0  | 0  | 0  | 0   | 0   | 0   | 0   | 0   | 0   | 1   | 0   | 0   | 0   | 0   | 0   | 0   | 0   | 0   | 0   | 0   | 0   | 0   | 0   |
| <i>Fragilaria radians</i>          | 0  | 0  | 0  | 0  | 0  | 0  | 0  | 0  | 0  | 0   | 0   | 0   | 0   | 0   | 0   | 0   | 0   | 0   | 0   | 0   | 0   | 0   | 0   | 0   | 0   | 0   | 0   | 0   | 0   |
| <i>Fragilaria recapitellata</i>    | 0  | 0  | 0  | 0  | 0  | 0  | 0  | 0  | 0  | 0   | 0   | 0   | 0   | 0   | 0   | 0   | 0   | 0   | 0   | 0   | 0   | 0   | 0   | 1   | 0   | 0   | 0   | 0   | 0   |
| <i>Fragilaria rumpens</i>          | 0  | 0  | 0  | 0  | 0  | 0  | 0  | 0  | 0  | 0   | 0   | 2   | 1   | 0   | 0   | 1   | 0   | 0   | 0   | 0   | 0   | 0   | 0   | 0   | 0   | 0   | 0   | 0   | 0   |
| <i>Fragilaria saxoplanctonica</i>  | 0  | 0  | 0  | 0  | 0  | 0  | 0  | 0  | 0  | 0   | 1   | 0   | 0   | 1   | 0   | 1   | 0   | 0   | 0   | 0   | 0   | 0   | 0   | 0   | 1   | 0   | 0   | 0   | 0   |
| <i>Fragilaria tenera</i>           | 4  | 0  | 2  | 5  | 0  | 0  | 0  | 0  | 0  | 0   | 0   | 0   | 0   | 0   | 0   | 0   | 0   | 0   | 0   | 0   | 0   | 0   | 0   | 0   | 0   | 0   | 0   | 0   | 0   |
| <i>Fragilaria vaucheriae</i>       | 1  | 3  | 5  | 4  | 1  | 2  | 0  | 0  | 0  | 0   | 2   | 0   | 0   | 1   | 0   | 0   | 11  | 7   | 4   | 4   | 0   | 0   | 5   | 7   | 2   | 0   | 0   | 2   | 4   |
| <i>Fragilariforma virescens</i>    | 0  | 0  | 0  | 0  | 0  | 0  | 0  | 0  | 0  | 0   | 0   | 0   | 0   | 0   | 0   | 0   | 0   | 0   | 1   | 0   | 0   | 0   | 0   | 0   | 0   | 0   | 0   | 0   | 0   |
| <i>Frustulia vulgaris</i>          | 0  | 0  | 0  | 0  | 0  | 0  | 0  | 0  | 0  | 0   | 0   | 0   | 0   | 0   | 0   | 0   | 0   | 0   | 0   | 0   | 0   | 0   | 0   | 0   | 0   | 0   | 0   | 0   | 0   |
| <i>Geisleria cummerowi</i>         | 0  | 0  | 0  | 0  | 1  | 0  | 0  | 0  | 0  | 0   | 0   | 0   | 0   | 0   | 0   | 0   | 0   | 0   | 0   | 0   | 0   | 0   | 0   | 0   | 0   | 0   | 0   | 0   | 0   |
| <i>Geisleria sp.</i>               | 0  | 0  | 0  | 1  | 0  | 0  | 0  | 0  | 0  | 0   | 0   | 0   | 0   | 0   | 0   | 0   | 0   | 0   | 0   | 0   | 0   | 0   | 0   | 0   | 0   | 0   | 0   | 0   | 0   |
| <i>Gomphonema clavatum</i>         | 0  | 0  | 0  | 0  | 0  | 0  | 0  | 0  | 0  | 0   | 0   | 0   | 0   | 0   | 0   | 0   | 0   | 0   | 0   | 0   | 0   | 0   | 0   | 0   | 0   | 0   | 0   | 0   | 0   |
| <i>Gomphonema graciledictum</i>    | 0  | 0  | 0  | 0  | 0  | 0  | 3  | 0  | 0  | 0   | 0   | 0   | 0   | 0   | 0   | 0   | 4   | 1   | 0   | 0   | 0   | 0   | 0   | 0   | 0   | 0   | 0   | 0   | 0   |
| <i>Gomphonema innocens</i>         | 0  | 0  | 0  | 0  | 0  | 0  | 0  | 0  | 0  | 0   | 0   | 0   | 0   | 0   | 0   | 0   | 0   | 0   | 0   | 0   | 0   | 0   | 0   | 0   | 0   | 0   | 0   | 0   | 0   |
| <i>Gomphonema italicum</i>         | 0  | 0  | 0  | 0  | 0  | 0  | 0  | 0  | 0  | 0   | 0   | 0   | 0   | 0   | 0   | 0   | 0   | 0   | 1   | 0   | 0   | 0   | 0   | 0   | 0   | 0   | 0   | 1   | 1   |
| <i>Gomphonema minutum</i>          | 0  | 0  | 0  | 0  | 0  | 0  | 0  | 0  | 0  | 0   | 0   | 0   | 0   | 0   | 0   | 0   | 0   | 1   | 0   | 0   | 0   | 0   | 0   | 0   | 0   | 0   | 0   | 0   | 0   |
| <i>Gomphonema pala</i>             | 0  | 0  | 1  | 0  | 0  | 0  | 0  | 0  | 0  | 0   | 0   | 0   | 0   | 0   | 0   | 0   | 0   | 0   | 0   | 0   | 0   | 0   | 0   | 0   | 0   | 0   | 0   | 0   | 0   |
| <i>Gomphonema parvulum</i> agg.    | 13 | 75 | 20 | 34 | 32 | 39 | 48 | 0  | 11 | 35  | 68  | 40  | 25  | 10  | 0   | 11  | 27  | 10  | 23  | 10  | 10  | 0   | 5   | 6   | 1   | 3   | 5   | 5   | 147 |





| year 2016                       | F1 | F2  | F3 | F4 | F5 | F6 | F7 | F8 | F9 | F10 | F11 | B12 | B13 | B14 | B15 | B16 | B17 | B18 | B19 | B20 | B21 | B22 | B23 | B24 | B25 | B26 | B27 | B28 | B29 |   |
|---------------------------------|----|-----|----|----|----|----|----|----|----|-----|-----|-----|-----|-----|-----|-----|-----|-----|-----|-----|-----|-----|-----|-----|-----|-----|-----|-----|-----|---|
| <i>Navicula upsaliensis</i>     | 0  | 0   | 0  | 0  | 0  | 0  | 0  | 0  | 0  | 0   | 0   | 0   | 0   | 0   | 0   | 0   | 0   | 0   | 0   | 0   | 0   | 0   | 0   | 0   | 0   | 0   | 0   | 0   | 0   |   |
| <i>Navicula viridula</i>        | 0  | 0   | 0  | 0  | 0  | 0  | 0  | 0  | 0  | 0   | 0   | 0   | 0   | 0   | 0   | 0   | 0   | 0   | 0   | 0   | 0   | 0   | 0   | 0   | 0   | 0   | 0   | 0   | 0   |   |
| <i>Neidium dubium</i>           | 0  | 0   | 0  | 0  | 0  | 0  | 0  | 0  | 0  | 0   | 0   | 0   | 0   | 0   | 0   | 0   | 0   | 0   | 0   | 0   | 0   | 0   | 0   | 0   | 0   | 0   | 0   | 0   | 0   |   |
| <i>Neidium sp.</i>              | 0  | 0   | 0  | 0  | 0  | 0  | 0  | 0  | 0  | 0   | 0   | 0   | 0   | 0   | 0   | 0   | 0   | 0   | 0   | 0   | 0   | 0   | 0   | 0   | 0   | 1   | 0   | 0   | 0   |   |
| <i>Nitzschia acicularis</i>     | 0  | 0   | 0  | 0  | 0  | 0  | 0  | 0  | 0  | 0   | 1   | 0   | 0   | 0   | 2   | 0   | 1   | 0   | 0   | 0   | 0   | 0   | 0   | 0   | 0   | 0   | 0   | 7   | 0   | 0 |
| <i>Nitzschia amphibia</i>       | 0  | 0   | 0  | 4  | 1  | 0  | 0  | 0  | 0  | 0   | 0   | 1   | 0   | 1   | 3   | 2   | 0   | 0   | 10  | 12  | 19  | 0   | 0   | 3   | 4   | 7   | 1   | 0   | 5   | 8 |
| <i>Nitzschia archibaldii</i>    | 7  | 0   | 8  | 10 | 0  | 10 | 28 | 1  | 0  | 0   | 19  | 85  | 0   | 215 | 400 | 412 | 9   | 0   | 6   | 2   | 287 | 116 | 0   | 85  | 43  | 61  | 207 | 33  | 0   |   |
| <i>Nitzschia dissipata</i>      | 0  | 1   | 2  | 0  | 0  | 0  | 0  | 0  | 0  | 0   | 4   | 2   | 3   | 0   | 0   | 0   | 5   | 0   | 0   | 0   | 1   | 0   | 0   | 0   | 0   | 0   | 0   | 0   | 2   |   |
| <i>Nitzschia filiformis</i>     | 0  | 0   | 0  | 0  | 0  | 0  | 0  | 0  | 0  | 0   | 0   | 0   | 0   | 0   | 0   | 0   | 0   | 0   | 1   | 0   | 0   | 0   | 0   | 0   | 0   | 0   | 0   | 0   | 0   |   |
| <i>Nitzschia linearis</i>       | 0  | 0   | 0  | 0  | 0  | 0  | 0  | 0  | 0  | 0   | 0   | 0   | 0   | 0   | 0   | 0   | 0   | 0   | 0   | 0   | 0   | 0   | 0   | 0   | 0   | 0   | 0   | 0   | 0   |   |
| <i>Nitzschia palea</i>          | 1  | 145 | 22 | 9  | 20 | 20 | 21 | 4  | 25 | 23  | 25  | 6   | 109 | 66  | 24  | 2   | 159 | 29  | 88  | 43  | 32  | 258 | 51  | 119 | 299 | 364 | 69  | 240 | 23  |   |
| <i>Nitzschia paleacea</i>       | 0  | 0   | 0  | 0  | 0  | 0  | 0  | 0  | 0  | 0   | 0   | 0   | 0   | 0   | 4   | 0   | 0   | 0   | 0   | 0   | 0   | 0   | 0   | 6   | 0   | 0   | 0   | 8   | 1   |   |
| <i>Nitzschia perminuta</i>      | 0  | 1   | 0  | 0  | 1  | 0  | 0  | 0  | 0  | 2   | 0   | 0   | 0   | 0   | 2   | 0   | 9   | 1   | 1   | 1   | 0   | 0   | 3   | 0   | 1   | 1   | 4   | 0   | 0   |   |
| <i>Nitzschia pumila</i>         | 0  | 0   | 0  | 0  | 0  | 0  | 0  | 0  | 0  | 0   | 0   | 0   | 0   | 0   | 0   | 0   | 0   | 0   | 0   | 0   | 0   | 0   | 0   | 0   | 0   | 0   | 0   | 0   | 0   |   |
| <i>Nitzschia recta</i>          | 0  | 0   | 0  | 0  | 0  | 0  | 0  | 0  | 0  | 0   | 0   | 0   | 0   | 0   | 0   | 0   | 0   | 0   | 0   | 0   | 0   | 0   | 0   | 0   | 0   | 0   | 0   | 0   | 1   |   |
| <i>Nitzschia solgensis</i>      | 0  | 0   | 0  | 0  | 0  | 0  | 0  | 0  | 0  | 0   | 0   | 1   | 0   | 0   | 0   | 0   | 0   | 0   | 0   | 0   | 0   | 0   | 0   | 0   | 0   | 0   | 0   | 0   | 0   |   |
| <i>Nitzschia subacicularis</i>  | 0  | 0   | 0  | 0  | 0  | 0  | 0  | 0  | 0  | 0   | 0   | 0   | 0   | 0   | 0   | 0   | 7   | 0   | 3   | 0   | 0   | 3   | 0   | 9   | 1   | 4   | 0   | 5   | 0   |   |
| <i>Nitzschia sp.</i>            | 0  | 0   | 0  | 0  | 0  | 0  | 0  | 0  | 0  | 0   | 0   | 0   | 0   | 0   | 0   | 0   | 0   | 0   | 0   | 0   | 0   | 0   | 0   | 0   | 0   | 0   | 0   | 0   | 0   |   |
| <i>Pinnularia borealis</i>      | 0  | 0   | 0  | 0  | 0  | 0  | 0  | 0  | 0  | 0   | 0   | 0   | 0   | 0   | 0   | 0   | 0   | 2   | 2   | 2   | 0   | 0   | 5   | 0   | 0   | 0   | 0   | 0   | 0   |   |
| <i>Pinnularia brebissonii</i>   | 0  | 0   | 0  | 0  | 0  | 0  | 0  | 0  | 0  | 0   | 0   | 0   | 0   | 0   | 0   | 0   | 0   | 0   | 0   | 0   | 0   | 0   | 0   | 0   | 0   | 0   | 0   | 0   | 0   |   |
| <i>Pinnularia dornii</i>        | 0  | 0   | 0  | 0  | 0  | 0  | 0  | 0  | 0  | 0   | 0   | 0   | 0   | 0   | 0   | 0   | 0   | 0   | 0   | 0   | 0   | 0   | 1   | 0   | 0   | 0   | 0   | 0   | 0   |   |
| <i>Pinnularia gibba</i>         | 0  | 0   | 0  | 0  | 0  | 0  | 0  | 0  | 0  | 0   | 0   | 0   | 0   | 0   | 0   | 0   | 1   | 0   | 0   | 0   | 0   | 0   | 0   | 0   | 0   | 0   | 0   | 0   | 0   |   |
| <i>Pinnularia grunowii</i>      | 0  | 0   | 0  | 0  | 0  | 0  | 0  | 0  | 0  | 0   | 0   | 0   | 0   | 0   | 0   | 0   | 2   | 3   | 4   | 3   | 0   | 0   | 0   | 0   | 0   | 0   | 0   | 0   | 0   |   |
| <i>Pinnularia isselana</i>      | 0  | 0   | 0  | 0  | 0  | 0  | 0  | 0  | 0  | 0   | 0   | 0   | 0   | 0   | 0   | 0   | 0   | 0   | 1   | 0   | 0   | 0   | 0   | 0   | 0   | 0   | 0   | 0   | 0   |   |
| <i>Pinnularia marchia</i>       | 0  | 0   | 0  | 0  | 0  | 0  | 0  | 0  | 0  | 0   | 0   | 0   | 0   | 0   | 0   | 0   | 0   | 14  | 18  | 34  | 0   | 0   | 12  | 6   | 0   | 0   | 0   | 2   | 0   |   |
| <i>Pinnularia neomajor</i>      | 0  | 0   | 0  | 0  | 0  | 0  | 0  | 0  | 0  | 0   | 0   | 0   | 0   | 0   | 0   | 0   | 0   | 0   | 1   | 0   | 0   | 0   | 0   | 0   | 0   | 0   | 0   | 0   | 0   |   |
| <i>Pinnularia obscura</i>       | 0  | 0   | 0  | 0  | 0  | 0  | 0  | 0  | 0  | 0   | 0   | 0   | 0   | 0   | 0   | 0   | 6   | 3   | 9   | 0   | 0   | 0   | 2   | 0   | 0   | 0   | 4   | 0   | 0   |   |
| <i>Pinnularia pseudogibba</i>   | 0  | 0   | 0  | 0  | 0  | 0  | 0  | 0  | 0  | 0   | 0   | 0   | 0   | 0   | 0   | 0   | 0   | 11  | 0   | 0   | 0   | 0   | 2   | 0   | 0   | 0   | 0   | 0   | 0   |   |
| <i>Pinnularia schoenfelderi</i> | 0  | 0   | 0  | 0  | 0  | 0  | 0  | 0  | 0  | 0   | 0   | 1   | 0   | 0   | 0   | 0   | 5   | 0   | 0   | 0   | 0   | 0   | 0   | 0   | 0   | 0   | 0   | 0   | 0   |   |
| <i>Pinnularia sinistra</i>      | 0  | 0   | 0  | 0  | 0  | 0  | 0  | 0  | 0  | 0   | 0   | 0   | 0   | 0   | 0   | 0   | 2   | 0   | 4   | 1   | 0   | 0   | 5   | 0   | 5   | 6   | 0   | 9   | 0   |   |
| <i>Pinnularia subcapitata</i>   | 0  | 0   | 0  | 0  | 0  | 0  | 0  | 0  | 0  | 0   | 0   | 0   | 0   | 0   | 0   | 0   | 0   | 10  | 9   | 1   | 0   | 0   | 22  | 0   | 0   | 0   | 0   | 0   | 0   |   |
| <i>Pinnularia subgibba</i>      | 0  | 0   | 0  | 0  | 0  | 0  | 0  | 0  | 0  | 0   | 0   | 0   | 0   | 0   | 0   | 0   | 8   | 2   | 1   | 1   | 0   | 0   | 0   | 0   | 0   | 0   | 1   | 0   | 0   |   |
| <i>Pinnularia viridiformis</i>  | 0  | 0   | 0  | 0  | 0  | 0  | 0  | 0  | 0  | 0   | 0   | 0   | 0   | 0   | 1   | 0   | 0   | 36  | 5   | 12  | 3   | 0   | 0   | 18  | 2   | 0   | 0   | 8   | 0   |   |

| year 2016                                           | F1 | F2 | F3 | F4 | F5 | F6 | F7 | F8 | F9 | F10 | F11 | B12 | B13 | B14 | B15 | B16 | B17 | B18 | B19 | B20 | B21 | B22 | B23 | B24 | B25 | B26 | B27 | B28 | B29 |
|-----------------------------------------------------|----|----|----|----|----|----|----|----|----|-----|-----|-----|-----|-----|-----|-----|-----|-----|-----|-----|-----|-----|-----|-----|-----|-----|-----|-----|-----|
| <i>Placoneis anglica</i>                            | 0  | 0  | 1  | 0  | 0  | 0  | 0  | 0  | 0  | 0   | 0   | 0   | 0   | 0   | 0   | 0   | 0   | 0   | 0   | 1   | 0   | 0   | 0   | 0   | 0   | 0   | 0   | 0   | 0   |
| <i>Placoneis clementioides</i>                      | 0  | 0  | 0  | 2  | 0  | 0  | 0  | 0  | 0  | 0   | 0   | 0   | 0   | 0   | 0   | 0   | 0   | 0   | 0   | 0   | 0   | 0   | 0   | 0   | 0   | 0   | 0   | 0   | 0   |
| <i>Placoneis clementis</i>                          | 0  | 0  | 0  | 0  | 0  | 0  | 0  | 0  | 0  | 0   | 0   | 0   | 0   | 0   | 0   | 0   | 0   | 0   | 0   | 0   | 0   | 0   | 0   | 0   | 0   | 0   | 0   | 0   | 0   |
| <i>Placoneis paraelginensis</i>                     | 0  | 0  | 0  | 0  | 0  | 0  | 0  | 0  | 0  | 0   | 0   | 0   | 0   | 0   | 0   | 0   | 0   | 0   | 0   | 0   | 0   | 0   | 1   | 0   | 0   | 0   | 0   | 0   | 0   |
| <i>Placoneis placentula</i>                         | 0  | 0  | 0  | 0  | 0  | 0  | 0  | 0  | 0  | 0   | 0   | 0   | 0   | 0   | 0   | 0   | 0   | 0   | 0   | 0   | 0   | 0   | 0   | 0   | 0   | 0   | 0   | 0   | 0   |
| <i>Placoneis pseudanglica</i>                       | 0  | 0  | 0  | 0  | 0  | 0  | 0  | 0  | 0  | 0   | 0   | 0   | 0   | 0   | 0   | 0   | 0   | 1   | 0   | 0   | 0   | 0   | 0   | 0   | 0   | 0   | 0   | 0   | 0   |
| <i>Placoneis</i> sp.                                | 0  | 0  | 0  | 0  | 0  | 0  | 0  | 0  | 0  | 0   | 0   | 0   | 0   | 0   | 0   | 0   | 0   | 0   | 0   | 0   | 1   | 0   | 0   | 0   | 0   | 0   | 0   | 0   | 0   |
| <i>Planothidium</i> cf. <i>dau</i> i                | 0  | 0  | 0  | 0  | 0  | 0  | 0  | 0  | 0  | 0   | 0   | 0   | 0   | 0   | 0   | 0   | 0   | 0   | 0   | 0   | 0   | 0   | 0   | 0   | 0   | 0   | 0   | 0   | 0   |
| <i>Planothidium delicatulum</i>                     | 0  | 0  | 0  | 1  | 0  | 0  | 0  | 0  | 0  | 0   | 0   | 0   | 0   | 0   | 0   | 0   | 0   | 0   | 0   | 0   | 0   | 0   | 0   | 0   | 0   | 0   | 0   | 0   | 0   |
| <i>Planothidium frequentissimum</i>                 | 9  | 4  | 11 | 16 | 5  | 20 | 1  | 8  | 39 | 36  | 27  | 2   | 9   | 2   | 0   | 0   | 15  | 5   | 12  | 16  | 4   | 1   | 9   | 1   | 2   | 0   | 0   | 0   | 24  |
| <i>Planothidium lanceolatum</i>                     | 0  | 0  | 0  | 0  | 0  | 0  | 2  | 5  | 4  | 3   | 0   | 0   | 1   | 8   | 0   | 0   | 0   | 0   | 0   | 0   | 1   | 0   | 0   | 1   | 0   | 0   | 0   | 1   | 17  |
| <i>Pseudostaurosira brevistriata</i>                | 1  | 0  | 2  | 27 | 0  | 0  | 2  | 0  | 1  | 1   | 0   | 5   | 0   | 1   | 0   | 0   | 0   | 8   | 24  | 0   | 0   | 5   | 3   | 0   | 0   | 0   | 6   | 3   | 1   |
| <i>Pseudostaurosira elliptica</i>                   | 0  | 0  | 2  | 13 | 0  | 0  | 2  | 0  | 6  | 0   | 1   | 4   | 0   | 5   | 0   | 0   | 8   | 12  | 7   | 20  | 0   | 6   | 9   | 4   | 0   | 0   | 12  | 3   | 0   |
| <i>Puncticulata balatonis</i>                       | 2  | 2  | 6  | 20 | 2  | 5  | 2  | 2  | 1  | 3   | 1   | 3   | 0   | 5   | 1   | 1   | 2   | 5   | 3   | 0   | 4   | 3   | 1   | 8   | 0   | 0   | 2   | 3   | 2   |
| <i>Rhoicosphenia abbreviata</i>                     | 0  | 0  | 0  | 0  | 0  | 0  | 0  | 0  | 0  | 0   | 0   | 0   | 1   | 0   | 0   | 0   | 0   | 0   | 0   | 0   | 0   | 0   | 0   | 0   | 0   | 0   | 0   | 0   | 0   |
| <i>Rossethidium petersenii</i>                      | 0  | 0  | 0  | 0  | 2  | 0  | 0  | 0  | 0  | 0   | 0   | 0   | 0   | 0   | 0   | 0   | 0   | 0   | 0   | 0   | 0   | 0   | 0   | 0   | 0   | 0   | 0   | 0   | 0   |
| <i>Sellaphora bacillum</i>                          | 0  | 0  | 0  | 0  | 0  | 0  | 0  | 0  | 0  | 0   | 0   | 0   | 0   | 0   | 0   | 0   | 0   | 0   | 0   | 0   | 0   | 0   | 0   | 0   | 0   | 0   | 0   | 0   | 0   |
| <i>Sellaphora pupula</i>                            | 0  | 0  | 0  | 0  | 0  | 0  | 0  | 0  | 0  | 0   | 0   | 0   | 0   | 1   | 0   | 0   | 1   | 2   | 0   | 1   | 1   | 0   | 2   | 0   | 0   | 0   | 1   | 0   | 0   |
| <i>Stauroneis leguminopsis</i>                      | 0  | 0  | 0  | 0  | 0  | 0  | 0  | 0  | 0  | 0   | 0   | 0   | 0   | 0   | 0   | 0   | 0   | 0   | 0   | 0   | 0   | 0   | 0   | 1   | 0   | 0   | 0   | 0   | 0   |
| <i>Stauroneis</i> sp.                               | 0  | 0  | 0  | 0  | 0  | 0  | 0  | 0  | 0  | 0   | 0   | 0   | 0   | 0   | 0   | 0   | 0   | 5   | 0   | 0   | 0   | 4   | 0   | 0   | 0   | 0   | 0   | 0   | 0   |
| <i>Stauroneis subgracilis</i>                       | 0  | 0  | 0  | 0  | 0  | 0  | 0  | 0  | 0  | 0   | 0   | 0   | 0   | 1   | 0   | 0   | 5   | 7   | 0   | 3   | 0   | 0   | 0   | 2   | 0   | 0   | 1   | 8   | 0   |
| <i>Staurosira binodis</i>                           | 1  | 0  | 0  | 0  | 0  | 0  | 0  | 0  | 0  | 1   | 1   | 0   | 0   | 0   | 0   | 0   | 3   | 8   | 1   | 7   | 0   | 0   | 3   | 1   | 0   | 0   | 0   | 1   | 0   |
| <i>Staurosira</i> cf. <i>venter</i>                 | 0  | 0  | 0  | 0  | 0  | 0  | 0  | 0  | 0  | 0   | 0   | 0   | 0   | 0   | 0   | 0   | 0   | 1   | 0   | 0   | 0   | 1   | 0   | 0   | 0   | 0   | 0   | 0   | 0   |
| <i>Staurosira construens</i>                        | 0  | 0  | 0  | 0  | 0  | 0  | 0  | 0  | 0  | 0   | 0   | 0   | 0   | 0   | 0   | 0   | 0   | 3   | 2   | 7   | 0   | 0   | 2   | 1   | 0   | 0   | 0   | 0   | 0   |
| <i>Staurosirella leptostauron</i> var. <i>dubia</i> | 4  | 1  | 1  | 10 | 0  | 0  | 0  | 0  | 0  | 3   | 3   | 0   | 0   | 5   | 0   | 0   | 1   | 5   | 6   | 1   | 0   | 1   | 2   | 9   | 0   | 1   | 0   | 3   | 0   |
| <i>Stephanodiscus hantzschii</i>                    | 0  | 0  | 0  | 0  | 0  | 0  | 0  | 0  | 0  | 0   | 0   | 0   | 0   | 0   | 0   | 0   | 0   | 2   | 0   | 5   | 18  | 0   | 1   | 0   | 0   | 26  | 0   | 0   |     |
| <i>Surirella angusta</i>                            | 0  | 0  | 0  | 0  | 0  | 0  | 0  | 0  | 0  | 0   | 0   | 0   | 0   | 0   | 0   | 0   | 2   | 14  | 0   | 33  | 0   | 0   | 0   | 0   | 0   | 0   | 0   | 0   | 0   |
| <i>Surirella brebissonii</i>                        | 0  | 0  | 0  | 0  | 0  | 0  | 0  | 0  | 0  | 0   | 0   | 0   | 0   | 0   | 0   | 0   | 0   | 0   | 0   | 0   | 0   | 0   | 0   | 0   | 0   | 0   | 0   | 0   | 1   |
| <i>Surirella minuta</i>                             | 0  | 0  | 0  | 0  | 0  | 0  | 0  | 0  | 0  | 0   | 0   | 0   | 0   | 0   | 0   | 0   | 0   | 0   | 0   | 0   | 0   | 0   | 0   | 0   | 0   | 0   | 0   | 0   | 0   |
| <i>Tryblionella salinarum</i>                       | 0  | 0  | 0  | 0  | 0  | 0  | 0  | 0  | 0  | 0   | 0   | 0   | 0   | 0   | 0   | 0   | 0   | 0   | 0   | 0   | 0   | 0   | 0   | 0   | 0   | 0   | 0   | 0   | 0   |
| <i>Ulnaria acus</i>                                 | 0  | 0  | 0  | 0  | 0  | 0  | 0  | 0  | 0  | 0   | 0   | 0   | 0   | 0   | 0   | 0   | 0   | 0   | 0   | 0   | 0   | 0   | 0   | 2   | 0   | 0   | 0   | 0   | 0   |
| <i>Ulnaria grunowii</i>                             | 0  | 0  | 0  | 0  | 0  | 0  | 0  | 0  | 0  | 0   | 0   | 0   | 0   | 0   | 0   | 0   | 0   | 0   | 0   | 0   | 6   | 0   | 0   | 0   | 0   | 0   | 0   | 0   | 0   |
| <i>Ulnaria ulna</i>                                 | 0  | 0  | 0  | 0  | 0  | 0  | 1  | 0  | 0  | 0   | 0   | 1   | 0   | 1   | 0   | 3   | 1   | 16  | 13  | 16  | 0   | 2   | 17  | 5   | 2   | 1   | 4   | 2   | 7   |

| year 2019                              | F1-19 <i>Bolboschoenus laticarpus</i> | F2-19 <i>Limosella aquatica</i> | F3-19 <i>Zannichellia palustris</i> | F4-19 <i>Elatine hydropiper</i> | FN5-19 <i>Bolboschoenus laticarpus</i> | FN6-19 <i>Limosella aquatica</i> | FN7-19 <i>Elatine hydropiper</i> | FN8-19 <i>Zannichellia palustris</i> |
|----------------------------------------|---------------------------------------|---------------------------------|-------------------------------------|---------------------------------|----------------------------------------|----------------------------------|----------------------------------|--------------------------------------|
| <i>Achnanthes</i> sp.                  | 2                                     | 0                               | 0                                   | 0                               | 1                                      | 1                                | 0                                | 0                                    |
| <i>Achnanthidium catenatum</i>         | 0                                     | 0                               | 0                                   | 0                               | 0                                      | 0                                | 0                                | 0                                    |
| <i>Achnanthidium</i> cf. <i>affine</i> | 0                                     | 0                               | 0                                   | 0                               | 0                                      | 0                                | 0                                | 0                                    |
| <i>Achnanthidium minutissimum</i>      | 4                                     | 5                               | 7                                   | 16                              | 49                                     | 30                               | 43                               | 0                                    |
| <i>Achnanthidium saprophilum</i>       | 19                                    | 3                               | 18                                  | 28                              | 18                                     | 14                               | 14                               | 4                                    |
| <i>Adlafia minuscula</i>               | 0                                     | 0                               | 0                                   | 0                               | 0                                      | 0                                | 0                                | 0                                    |
| <i>Amphora copulata</i>                | 0                                     | 0                               | 0                                   | 0                               | 0                                      | 0                                | 0                                | 0                                    |
| <i>Amphora lange-bertalotii</i>        | 3                                     | 1                               | 4                                   | 1                               | 0                                      | 0                                | 0                                | 4                                    |
| <i>Amphora ovalis</i>                  | 0                                     | 0                               | 0                                   | 0                               | 0                                      | 0                                | 0                                | 0                                    |
| <i>Amphora pediculus</i>               | 1                                     | 0                               | 0                                   | 0                               | 0                                      | 0                                | 0                                | 0                                    |
| <i>Anomoeoneis sphaerophora</i>        | 0                                     | 0                               | 0                                   | 0                               | 0                                      | 0                                | 0                                | 0                                    |
| <i>Asterionella formosa</i>            | 0                                     | 0                               | 0                                   | 0                               | 0                                      | 0                                | 0                                | 0                                    |
| <i>Aulacoseira ambigua</i>             | 18                                    | 4                               | 7                                   | 7                               | 12                                     | 5                                | 13                               | 14                                   |
| <i>Aulacoseira muzzanensis</i>         | 0                                     | 0                               | 0                                   | 0                               | 0                                      | 0                                | 0                                | 0                                    |
| <i>Aulacoseira</i> sp.                 | 0                                     | 0                               | 0                                   | 0                               | 0                                      | 0                                | 0                                | 0                                    |
| <i>Caloneis lancettula</i>             | 0                                     | 0                               | 0                                   | 0                               | 0                                      | 0                                | 0                                | 0                                    |
| <i>Caloneis silicula</i>               | 0                                     | 0                               | 0                                   | 0                               | 0                                      | 0                                | 0                                | 0                                    |
| <i>Cocconeis pediculus</i>             | 0                                     | 0                               | 0                                   | 0                               | 0                                      | 0                                | 0                                | 1                                    |
| <i>Cocconeis placentula</i>            | 0                                     | 2                               | 3                                   | 0                               | 0                                      | 0                                | 0                                | 1                                    |
| <i>Craticula ambigua</i>               | 0                                     | 0                               | 0                                   | 0                               | 0                                      | 0                                | 0                                | 1                                    |
| <i>Craticula</i> cf. <i>halophila</i>  | 0                                     | 1                               | 0                                   | 0                               | 0                                      | 0                                | 0                                | 0                                    |
| <i>Craticula cuspidata</i>             | 0                                     | 0                               | 0                                   | 0                               | 0                                      | 0                                | 0                                | 0                                    |
| <i>Craticula</i> sp.                   | 0                                     | 0                               | 0                                   | 0                               | 0                                      | 0                                | 0                                | 0                                    |
| <i>Craticula subminuscula</i>          | 0                                     | 0                               | 0                                   | 0                               | 1                                      | 0                                | 1                                | 1                                    |
| <i>Cyclostephanos dubius</i>           | 0                                     | 0                               | 0                                   | 0                               | 0                                      | 0                                | 0                                | 0                                    |
| <i>Cyclotella atomus</i>               | 0                                     | 1                               | 0                                   | 0                               | 1                                      | 0                                | 3                                | 2                                    |

| year 2019                          | F1 | F2  | F3  | F4  | FN5 | FN6 | FN7 | FN8 |
|------------------------------------|----|-----|-----|-----|-----|-----|-----|-----|
| <i>Cyclotella meneghiniana</i>     | 1  | 0   | 0   | 0   | 0   | 0   | 0   | 0   |
| <i>Cymatopleura solea</i>          | 1  | 0   | 0   | 0   | 0   | 0   | 0   | 1   |
| <i>Cymbella cf. subcistula</i>     | 0  | 0   | 0   | 0   | 0   | 0   | 0   | 0   |
| <i>Cymbella neocistula</i>         | 0  | 0   | 0   | 0   | 0   | 0   | 0   | 0   |
| <i>Cymbella sp.</i>                | 0  | 0   | 0   | 0   | 0   | 0   | 0   | 0   |
| <i>Discostella pseudosteliger</i>  | 0  | 0   | 0   | 0   | 0   | 0   | 0   | 0   |
| <i>Encyonema auerswaldii</i>       | 0  | 1   | 0   | 1   | 0   | 0   | 0   | 0   |
| <i>Encyonema minutum</i> agg.      | 5  | 4   | 1   | 7   | 14  | 7   | 2   | 3   |
| <i>Epithemia sp.</i>               | 0  | 0   | 0   | 0   | 0   | 0   | 0   | 0   |
| <i>Eunotia bidens</i>              | 0  | 0   | 0   | 0   | 0   | 0   | 0   | 0   |
| <i>Eunotia bilunaris</i>           | 0  | 0   | 0   | 0   | 0   | 0   | 0   | 0   |
| <i>Eunotia sp.</i>                 | 0  | 0   | 0   | 0   | 0   | 0   | 0   | 0   |
| <i>Fallacia pygmaea</i>            | 0  | 0   | 0   | 0   | 0   | 0   | 0   | 0   |
| <i>Fistuliifera saprophila</i>     | 0  | 0   | 2   | 0   | 3   | 3   | 1   | 3   |
| <i>Fragilaria capucina</i>         | 1  | 5   | 1   | 2   | 0   | 0   | 3   | 3   |
| <i>Fragilaria gracilis</i>         | 0  | 0   | 0   | 0   | 0   | 0   | 0   | 0   |
| <i>Fragilaria perdelicatissima</i> | 0  | 0   | 0   | 1   | 0   | 0   | 0   | 0   |
| <i>Fragilaria radians</i>          | 1  | 0   | 0   | 0   | 0   | 0   | 0   | 0   |
| <i>Fragilaria recapitellata</i>    | 0  | 0   | 0   | 0   | 0   | 0   | 0   | 0   |
| <i>Fragilaria rumpens</i>          | 0  | 0   | 0   | 0   | 0   | 0   | 0   | 0   |
| <i>Fragilaria saxoplanctonica</i>  | 0  | 0   | 0   | 0   | 0   | 0   | 2   | 2   |
| <i>Fragilaria tenera</i>           | 0  | 0   | 0   | 0   | 0   | 2   | 0   | 0   |
| <i>Fragilaria vaucheriae</i>       | 2  | 7   | 7   | 3   | 0   | 1   | 4   | 3   |
| <i>Fragilariforma virescens</i>    | 0  | 0   | 0   | 0   | 0   | 0   | 0   | 0   |
| <i>Frustulia vulgaris</i>          | 0  | 0   | 0   | 0   | 0   | 0   | 0   | 0   |
| <i>Geisleria cummerowi</i>         | 0  | 0   | 0   | 0   | 0   | 0   | 0   | 0   |
| <i>Geisleria sp.</i>               | 0  | 0   | 0   | 0   | 0   | 0   | 0   | 0   |
| <i>Gomphonema clavatum</i>         | 0  | 0   | 0   | 0   | 0   | 0   | 0   | 0   |
| <i>Gomphonema graciledictum</i>    | 0  | 0   | 1   | 0   | 0   | 0   | 0   | 0   |
| <i>Gomphonema innocens</i>         | 0  | 0   | 0   | 0   | 0   | 0   | 0   | 0   |
| <i>Gomphonema italicum</i>         | 0  | 0   | 0   | 0   | 0   | 0   | 0   | 0   |
| <i>Gomphonema minutum</i>          | 0  | 2   | 1   | 0   | 0   | 0   | 0   | 0   |
| <i>Gomphonema pala</i>             | 0  | 0   | 0   | 0   | 0   | 0   | 0   | 0   |
| <i>Gomphonema parvulum</i> agg.    | 60 | 152 | 137 | 124 | 150 | 215 | 98  | 63  |

| year 2019                              | F1 | F2 | F3  | F4 | FN5 | FN6 | FN7 | FN8 |
|----------------------------------------|----|----|-----|----|-----|-----|-----|-----|
| <i>Gomphonema pseudaugur</i>           | 0  | 0  | 0   | 0  | 0   | 0   | 0   | 0   |
| <i>Gomphonema pumilum</i>              | 0  | 0  | 0   | 0  | 0   | 0   | 0   | 0   |
| <i>Gomphonema sarcophagus</i>          | 0  | 0  | 0   | 0  | 0   | 0   | 0   | 0   |
| <i>Gomphonema subclavatum</i>          | 2  | 1  | 1   | 0  | 0   | 0   | 0   | 0   |
| <i>Gyrosigma acuminatum</i>            | 0  | 0  | 0   | 0  | 0   | 0   | 0   | 0   |
| <i>Gyrosigma kuetzingii</i>            | 0  | 0  | 0   | 0  | 0   | 0   | 0   | 0   |
| <i>Halamphora veneta</i>               | 0  | 0  | 1   | 9  | 0   | 0   | 0   | 0   |
| <i>Hantzschia abundans</i>             | 0  | 0  | 0   | 0  | 0   | 0   | 0   | 0   |
| <i>Hippodonta capitata</i>             | 2  | 0  | 2   | 0  | 1   | 0   | 1   | 4   |
| <i>Lemnicola hungarica</i>             | 0  | 0  | 0   | 0  | 0   | 0   | 0   | 0   |
| <i>Luticola</i> cf. <i>saprophila</i>  | 0  | 0  | 0   | 0  | 0   | 0   | 0   | 0   |
| <i>Luticola</i> cf. <i>ventricosa</i>  | 0  | 0  | 0   | 0  | 0   | 0   | 0   | 0   |
| <i>Luticola</i> sp.                    | 0  | 0  | 0   | 0  | 0   | 0   | 0   | 0   |
| <i>Melosira varians</i>                | 0  | 0  | 0   | 0  | 0   | 0   | 0   | 0   |
| <i>Meridion circulare</i> agg.         | 0  | 0  | 0   | 0  | 0   | 1   | 0   | 0   |
| <i>Navicula antonii</i>                | 0  | 0  | 0   | 0  | 0   | 0   | 0   | 0   |
| <i>Navicula capitatoradiata</i>        | 96 | 85 | 124 | 74 | 14  | 12  | 32  | 36  |
| <i>Navicula</i> cf. <i>upsaliensis</i> | 0  | 0  | 0   | 0  | 0   | 0   | 0   | 0   |
| <i>Navicula cryptocephala</i>          | 13 | 6  | 4   | 4  | 6   | 5   | 11  | 10  |
| <i>Navicula cryptotenella</i>          | 0  | 0  | 0   | 0  | 1   | 0   | 1   | 0   |
| <i>Navicula cryptotenelloides</i>      | 0  | 0  | 0   | 0  | 0   | 0   | 0   | 0   |
| <i>Navicula erifuga</i>                | 0  | 0  | 0   | 0  | 0   | 0   | 0   | 0   |
| <i>Navicula gregaria</i>               | 0  | 0  | 0   | 0  | 0   | 0   | 0   | 0   |
| <i>Navicula ingrata</i>                | 0  | 0  | 0   | 0  | 0   | 0   | 0   | 0   |
| <i>Navicula lacuum</i>                 | 2  | 3  | 1   | 2  | 2   | 3   | 3   | 4   |
| <i>Navicula lanceolata</i>             | 0  | 0  | 0   | 0  | 0   | 0   | 0   | 0   |
| <i>Navicula menisculus</i>             | 0  | 0  | 0   | 0  | 0   | 0   | 1   | 0   |
| <i>Navicula meniscus</i>               | 0  | 0  | 0   | 0  | 0   | 0   | 0   | 0   |
| <i>Navicula reichardtiana</i>          | 8  | 2  | 3   | 3  | 2   | 5   | 5   | 3   |
| <i>Navicula simulata</i>               | 0  | 0  | 0   | 0  | 0   | 0   | 0   | 0   |
| <i>Navicula slesvicensis</i>           | 0  | 0  | 0   | 0  | 0   | 0   | 0   | 0   |
| <i>Navicula tenelloides</i>            | 0  | 0  | 0   | 0  | 0   | 0   | 0   | 0   |
| <i>Navicula tripunctata</i>            | 0  | 0  | 0   | 0  | 0   | 0   | 0   | 0   |
| <i>Navicula trivialis</i>              | 3  | 0  | 1   | 2  | 2   | 0   | 6   | 5   |

| year 2019                       | F1 | F2 | F3 | F4 | FN5 | FN6 | FN7 | FN8 |
|---------------------------------|----|----|----|----|-----|-----|-----|-----|
| <i>Navicula upsaliensis</i>     | 0  | 0  | 0  | 0  | 0   | 0   | 0   | 0   |
| <i>Navicula viridula</i>        | 0  | 0  | 0  | 0  | 0   | 0   | 0   | 0   |
| <i>Neidium dubium</i>           | 0  | 0  | 0  | 0  | 0   | 0   | 0   | 0   |
| <i>Neidium sp.</i>              | 0  | 0  | 0  | 0  | 0   | 0   | 0   | 0   |
| <i>Nitzschia acicularis</i>     | 0  | 0  | 0  | 0  | 0   | 0   | 0   | 0   |
| <i>Nitzschia amphibia</i>       | 7  | 6  | 9  | 3  | 0   | 0   | 6   | 6   |
| <i>Nitzschia archibaldii</i>    | 5  | 5  | 18 | 50 | 11  | 63  | 35  | 33  |
| <i>Nitzschia dissipata</i>      | 0  | 1  | 0  | 3  | 2   | 0   | 0   | 0   |
| <i>Nitzschia filiformis</i>     | 0  | 0  | 0  | 0  | 0   | 0   | 0   | 0   |
| <i>Nitzschia linearis</i>       | 0  | 0  | 0  | 0  | 0   | 0   | 0   | 0   |
| <i>Nitzschia palea</i>          | 12 | 3  | 11 | 8  | 2   | 4   | 6   | 3   |
| <i>Nitzschia paleacea</i>       | 0  | 0  | 0  | 0  | 0   | 0   | 0   | 0   |
| <i>Nitzschia perminuta</i>      | 0  | 0  | 0  | 0  | 0   | 0   | 0   | 0   |
| <i>Nitzschia pumila</i>         | 0  | 0  | 0  | 0  | 0   | 0   | 0   | 0   |
| <i>Nitzschia recta</i>          | 0  | 0  | 0  | 0  | 0   | 0   | 0   | 0   |
| <i>Nitzschia solgensis</i>      | 0  | 0  | 0  | 0  | 0   | 0   | 5   | 0   |
| <i>Nitzschia subacicularis</i>  | 0  | 0  | 0  | 0  | 0   | 0   | 0   | 0   |
| <i>Nitzschia sp.</i>            | 1  | 0  | 0  | 0  | 0   | 0   | 0   | 0   |
| <i>Pinnularia borealis</i>      | 0  | 0  | 0  | 0  | 0   | 0   | 0   | 0   |
| <i>Pinnularia brebissonii</i>   | 0  | 0  | 0  | 4  | 0   | 0   | 0   | 0   |
| <i>Pinnularia dornii</i>        | 0  | 0  | 0  | 0  | 0   | 0   | 0   | 0   |
| <i>Pinnularia gibba</i>         | 0  | 0  | 0  | 0  | 0   | 0   | 0   | 0   |
| <i>Pinnularia grunowii</i>      | 0  | 0  | 0  | 0  | 0   | 0   | 0   | 0   |
| <i>Pinnularia isselana</i>      | 0  | 0  | 0  | 0  | 0   | 0   | 0   | 0   |
| <i>Pinnularia marchia</i>       | 0  | 0  | 0  | 0  | 0   | 0   | 0   | 0   |
| <i>Pinnularia neomajor</i>      | 0  | 0  | 0  | 0  | 0   | 0   | 0   | 0   |
| <i>Pinnularia obscura</i>       | 0  | 0  | 0  | 0  | 0   | 0   | 0   | 0   |
| <i>Pinnularia pseudogibba</i>   | 0  | 0  | 0  | 0  | 0   | 0   | 0   | 0   |
| <i>Pinnularia schoenfelderi</i> | 0  | 0  | 0  | 0  | 0   | 0   | 0   | 0   |
| <i>Pinnularia sinistra</i>      | 0  | 0  | 0  | 0  | 0   | 0   | 0   | 0   |
| <i>Pinnularia subcapitata</i>   | 0  | 1  | 0  | 0  | 0   | 0   | 1   | 0   |
| <i>Pinnularia subgibba</i>      | 0  | 0  | 0  | 0  | 0   | 0   | 0   | 0   |
| <i>Pinnularia viridiformis</i>  | 0  | 0  | 0  | 0  | 2   | 0   | 0   | 0   |

| year 2019                                           | F1 | F2 | F3 | F4 | FN5 | FN6 | FN7 | FN8 |
|-----------------------------------------------------|----|----|----|----|-----|-----|-----|-----|
| <i>Placoneis anglica</i>                            | 0  | 0  | 0  | 0  | 0   | 0   | 0   | 0   |
| <i>Placoneis clementioides</i>                      | 0  | 1  | 0  | 0  | 0   | 0   | 0   | 0   |
| <i>Placoneis clementis</i>                          | 0  | 0  | 0  | 0  | 0   | 0   | 0   | 0   |
| <i>Placoneis paraelginensis</i>                     | 0  | 0  | 0  | 0  | 0   | 0   | 0   | 0   |
| <i>Placoneis placentula</i>                         | 0  | 0  | 0  | 0  | 1   | 0   | 1   | 0   |
| <i>Placoneis pseudanglica</i>                       | 0  | 2  | 0  | 0  | 0   | 0   | 0   | 0   |
| <i>Placoneis</i> sp.                                | 0  | 0  | 0  | 0  | 0   | 0   | 0   | 0   |
| <i>Planothidium</i> cf. <i>dau</i>                  | 0  | 0  | 0  | 0  | 0   | 0   | 0   | 0   |
| <i>Planothidium delicatulum</i>                     | 0  | 0  | 0  | 0  | 0   | 0   | 0   | 0   |
| <i>Planothidium frequentissimum</i>                 | 22 | 12 | 2  | 13 | 7   | 5   | 4   | 1   |
| <i>Planothidium lanceolatum</i>                     | 0  | 0  | 0  | 1  | 0   | 0   | 0   | 0   |
| <i>Pseudostaurosira brevistriata</i>                | 0  | 23 | 5  | 3  | 39  | 7   | 31  | 96  |
| <i>Pseudostaurosira elliptica</i>                   | 0  | 36 | 23 | 25 | 43  | 37  | 42  | 49  |
| <i>Puncticulata balatonis</i>                       | 7  | 2  | 1  | 8  | 4   | 3   | 3   | 4   |
| <i>Rhoicosphenia abbreviata</i>                     | 0  | 0  | 0  | 0  | 0   | 0   | 0   | 0   |
| <i>Rosithidium petersenii</i>                       | 0  | 0  | 0  | 0  | 0   | 0   | 0   | 0   |
| <i>Sellaphora bacillum</i>                          | 0  | 0  | 0  | 0  | 0   | 0   | 0   | 0   |
| <i>Sellaphora pupula</i>                            | 10 | 3  | 1  | 4  | 3   | 1   | 2   | 1   |
| <i>Stauroneis leguminopsis</i>                      | 0  | 0  | 0  | 0  | 0   | 0   | 0   | 0   |
| <i>Stauroneis</i> sp.                               | 0  | 0  | 0  | 0  | 0   | 0   | 0   | 0   |
| <i>Stauroneis subgracilis</i>                       | 0  | 0  | 0  | 0  | 0   | 0   | 0   | 0   |
| <i>Staurosira binodis</i>                           | 2  | 1  | 0  | 0  | 1   | 0   | 2   | 3   |
| <i>Staurosira</i> cf. <i>venter</i>                 | 0  | 0  | 0  | 0  | 0   | 0   | 0   | 0   |
| <i>Staurosira construens</i>                        | 0  | 0  | 0  | 0  | 0   | 0   | 0   | 0   |
| <i>Staurosirella leptostauron</i> var. <i>dubia</i> | 31 | 18 | 4  | 17 | 16  | 19  | 21  | 42  |
| <i>Stephanodiscus hantzschii</i>                    | 0  | 0  | 0  | 0  | 0   | 1   | 3   | 2   |
| <i>Surirella angusta</i>                            | 1  | 1  | 0  | 0  | 0   | 0   | 0   | 0   |
| <i>Surirella brebissonii</i>                        | 0  | 0  | 0  | 0  | 0   | 0   | 0   | 0   |
| <i>Surirella minuta</i>                             | 0  | 0  | 0  | 0  | 0   | 0   | 0   | 0   |
| <i>Tryblionella salinarum</i>                       | 0  | 1  | 0  | 0  | 0   | 0   | 0   | 0   |
| <i>Ulnaria acus</i>                                 | 0  | 1  | 0  | 0  | 0   | 0   | 0   | 0   |
| <i>Ulnaria grunowii</i>                             | 0  | 0  | 0  | 0  | 0   | 0   | 0   | 0   |
| <i>Ulnaria ulna</i>                                 | 1  | 0  | 0  | 0  | 0   | 0   | 1   | 0   |
