# Supplementary material
Source: MDPI journal article supplement (https://www.mdpi.com/2073-4441/13/11/1569)
Supplement: s1 [file s1]

## Drivers of macrophyte and diatom diversity in a shallow hypertrophic lake

Kateřina Šumberová\*, Ondřej Vild, Michal Ducháček, Martina Fabšičová, Jan Potužák, and Markéta Fránková

\* Correspondence: katerina.sumberova@ibot.cas.cz

**Table S4:** List of vascular plant species and charophytes along with their frequencies, quantities and classification to species groups.

**Frequencies** were counted separately for each year as a proportion of segments, where the particular taxon was recorded. For the whole study period, a record from any year was counted as a presence in a particular segment. **Frequency colours:**  $\geq 20\%$  bold,  $\geq 50\%$  light green,  $\geq 75\%$  dark green,  $\geq 90\%$  brown.

**Presence** in 1, 2, 3 or 4 research years was calculated for each species. Colours: occurrence in 3 years – bold, in 4 years – red.

**Quantities** – the counts mean the sum of records of each species which refer to a species as to a dominant. The years were not counted separately. **Dominance colours:**  $\geq 10$  occurrences as a dominant – bold,  $\geq 20$  occurrences as a dominant – blue.

**(a) ecological groups (ecol.)** – according to the habitat ecology of the species. Categories: **aq** – all **aquatic** plant species, i.e. free-floating, floating-leaved and submerged; **saq** – **semiaquatic** or amphibious plant species, i.e. with optimal development in shallow water or on wet mud; **b** – annual or shortly perennial species of exposed pond **bottoms**; **r** – **reed** and tall sedge bed species (perennial); **w** – annual and perennial ruderal **weeds** and **weeds** of arable land (into the fishpond mainly introduced with manure, cereals for fish feeding, from surrounding pastures, arable fields and gardens); **g** – **grassland** species, mainly species of wet and mesophilous disturbed grasslands, meadows and pastures, rarely also species of dry grasslands; **f** – **forest** species, including herbs, creeping semi-woody plants such as *Rubus caesius* and forest trees and shrubs; **wet-s** – native **wetland** trees and **shrubs** (*Alnus glutinosa*, *Salix* spp.); **rc** – species of **rocks**, walls and screes; **c** – **cultural** plants, including fruit and ornamental trees, ornamental herbal species, field crops, vegetables, etc. escaped from cultivation; **e** – spring **ephemeral** terrestrial herbs growing particularly in gaps in dry grasslands but also along roads and in arable fields; **m** – herbs and shrubs of forest **margins**, also growing in abandoned meadows, clearings and in open-canopy forests; **tf** – herbs and lianas growing in **tall-forb** vegetation, usually following up the reed and tall sedge beds; **s** – **springs** and mires.

For the graph (Figure 5b) some groups with only a few species were merged: **Aquatic & subaquatic** = aquatic and subaquatic (amphibious) species; **Reed bed & spring** = species of reed and tall sedge beds and of springs and mires; **Grassland** = grassland, spring ephemeral and rock species; **Other** = species of forests, nitrophilous margins, tall forb vegetation and species escaped from cultivations.

**(b) functional groups (funct.)** – according to species' life history traits and relationship to water depth/water level fluctuation. Categories: **free** – free floating plants (only the species floating on the water surface were recorded); **flo-l** – rooted **floating leaved** species; **sub** – rooted **submerged** species; **amph** – **amphibious** (or subaquatic) species; **wet** – **wetland** annual (to shortly perennial) species; **hel** – **helophytes**, wetland perennials; **ter** – all **terrestrial** herbs, lianas and creeping semi-woody plants; **tree** – trees and shrubs, both wetland and non-wetland.

For the graph (Figure 5a) the following groups were merged due to a small amount of species: **Floating leaved & free floating** = floating leaved and free floating species; **wetland annual & amphibious** = amphibious species were included into the group of wetland annual and shortly perennial species.

**(c) origin (orig.)** – according to the classification of the species based on its origin in the Czech Republic (Pyšek et al. [87], Danihelka et al. [91]). Categories: **nat** – native species, **arch** – archaeophytes, **neo** – neophytes.

**(d) threat** – threat status according to recent Red Data Lists for the Czech Republic (Grulich [88], Grulich & Chobot [89]). C1 = CR, C2 = EN, C3 = VU, C4 = NT.

Taxa identified only to a genus or aggregate level are not classified into those groups, if their status cannot be unequivocally determined (e.g. the individual species of the same genus have a different origin).

Taxa printed in grey were included into overall species counts (whole period, individual years, species groups) only if none precisely determined species of the particular genus or aggregate was available for the given calculations.

| species                                           | ecol. | funct. | orig. | threat | freq. all years | freq. 2014 | freq. 2015 | freq. 2016 | freq. 2019 | years of occurrence | dominants               |
|---------------------------------------------------|-------|--------|-------|--------|-----------------|------------|------------|------------|------------|---------------------|-------------------------|
|                                                   |       |        |       |        | n=30            | n=30       | n=30       | n=30       | n=19       | n=4                 | n=109<br>(segment-year) |
| <i>Agrostis capillaris</i>                        | g     | ter    | nat   |        | 0.03            | 0.03       | 0.00       | 0.00       | 0.00       | 1                   | 0                       |
| <i>Agrostis stolonifera</i>                       | g     | ter    | nat   |        | 0.73            | 0.40       | 0.70       | 0.17       | 0.00       | 3                   | 8                       |
| <i>Achillea millefolium</i> agg.                  | g     | ter    | nat   |        | 0.13            | 0.00       | 0.13       | 0.03       | 0.00       | 2                   | 0                       |
| <i>Alisma plantago-aquatica</i>                   | r     | hel    | nat   |        | 0.27            | 0.23       | 0.00       | 0.00       | 0.05       | 2                   | 0                       |
| <i>Alliaria petiolata</i>                         | f     | ter    | nat   |        | 0.03            | 0.00       | 0.03       | 0.00       | 0.00       | 1                   | 0                       |
| <i>Alnus glutinosa</i>                            | wet-s | tree   | nat   |        | 0.03            | 0.00       | 0.03       | 0.00       | 0.00       | 1                   | 0                       |
| <i>Alopecurus aequalis</i>                        | b     | wet    | nat   |        | 1.00            | 0.80       | 1.00       | 0.47       | 0.89       | 4                   | 15                      |
| <i>Alopecurus geniculatus</i>                     | b     | wet    | nat   |        | 0.77            | 0.63       | 0.57       | 0.37       | 0.21       | 4                   | 17                      |
| <i>Alopecurus myosuroides</i>                     | w     | ter    | arch  |        | 0.07            | 0.03       | 0.07       | 0.03       | 0.05       | 4                   | 0                       |
| <i>Alopecurus pratensis</i>                       | g     | ter    | nat   |        | 0.43            | 0.17       | 0.13       | 0.20       | 0.00       | 3                   | 0                       |
| <i>Amaranthus blitum</i>                          | w     | ter    | arch  | C3     | 0.50            | 0.03       | 0.47       | 0.03       | 0.00       | 3                   | 0                       |
| <i>Anagallis arvensis</i>                         | w     | ter    | arch  |        | 0.03            | 0.03       | 0.00       | 0.00       | 0.00       | 1                   | 0                       |
| <i>Anthoxanthum odoratum</i>                      | g     | ter    | nat   |        | 0.03            | 0.00       | 0.00       | 0.03       | 0.00       | 1                   | 0                       |
| <i>Apera spica-venti</i>                          | w     | ter    | arch  |        | 0.37            | 0.03       | 0.37       | 0.03       | 0.00       | 3                   | 0                       |
| <i>Aphanes arvensis</i>                           | w     | ter    | nat   | C3     | 0.03            | 0.03       | 0.00       | 0.00       | 0.00       | 1                   | 0                       |
| <i>Arabidopsis thaliana</i>                       | e     | ter    | nat   |        | 0.40            | 0.07       | 0.37       | 0.13       | 0.00       | 3                   | 0                       |
| <i>Arctium lappa</i>                              | w     | ter    | arch  |        | 0.03            | 0.03       | 0.00       | 0.00       | 0.00       | 1                   | 0                       |
| <i>Arctium</i> sp.                                | w     | ter    | –     |        | 0.17            | 0.00       | 0.03       | 0.13       | 0.00       | 2                   | 0                       |
| <i>Arenaria serpyllifolia</i>                     | e     | ter    | nat   |        | 0.07            | 0.03       | 0.03       | 0.07       | 0.00       | 3                   | 0                       |
| <i>Artemisia vulgaris</i>                         | w     | ter    | nat   |        | 0.33            | 0.20       | 0.20       | 0.07       | 0.00       | 3                   | 0                       |
| <i>Asplenium ruta-muraria</i>                     | rc    | ter    | nat   |        | 0.03            | 0.03       | 0.00       | 0.00       | 0.00       | 1                   | 0                       |
| <i>Atriplex patula</i>                            | w     | ter    | arch  |        | 0.20            | 0.10       | 0.17       | 0.00       | 0.00       | 2                   | 0                       |
| <i>Atriplex prostrata</i> subsp. <i>latifolia</i> | b     | wet    | nat   | C4     | 0.30            | 0.03       | 0.27       | 0.03       | 0.00       | 3                   | 0                       |
| <i>Atriplex sagittata</i>                         | w     | ter    | arch  |        | 0.03            | 0.03       | 0.00       | 0.00       | 0.00       | 1                   | 0                       |
| <i>Aurinaria saxatilis</i>                        | rc    | ter    | nat   | C4     | 0.03            | 0.00       | 0.03       | 0.00       | 0.00       | 1                   | 0                       |
| <i>Avena fatua</i>                                | w     | ter    | arch  |        | 0.03            | 0.00       | 0.03       | 0.00       | 0.00       | 1                   | 0                       |
| <i>Avena sativa</i>                               | c     | ter    | arch  |        | 0.03            | 0.03       | 0.00       | 0.00       | 0.00       | 1                   | 0                       |
| <i>Barbarea stricta</i>                           | tf    | ter    | nat   | C3     | 0.27            | 0.07       | 0.23       | 0.03       | 0.00       | 3                   | 0                       |
| <i>Barbarea vulgaris</i>                          | tf    | ter    | nat   |        | 0.10            | 0.00       | 0.00       | 0.10       | 0.00       | 1                   | 0                       |
| <i>Batrachium peltatum</i>                        | aq    | flo    | nat   |        | 0.23            | 0.00       | 0.23       | 0.03       | 0.00       | 2                   | 0                       |
| <i>Bellis perennis</i>                            | g     | ter    | nat   |        | 0.17            | 0.00       | 0.03       | 0.13       | 0.00       | 2                   | 0                       |
| <i>Betula pendula</i>                             | f     | tree   | nat   |        | 0.03            | 0.00       | 0.00       | 0.03       | 0.00       | 1                   | 0                       |
| <i>Bidens cernuus</i>                             | b     | wet    | nat   |        | 0.87            | 0.53       | 0.70       | 0.07       | 0.21       | 4                   | 1                       |
| <i>Bidens frondosus</i>                           | b     | wet    | neo   |        | 0.77            | 0.63       | 0.40       | 0.13       | 0.11       | 4                   | 1                       |
| <i>Bidens radiatus</i>                            | b     | wet    | nat   |        | 0.97            | 0.77       | 0.93       | 0.23       | 0.79       | 4                   | 17                      |
| <i>Bidens tripartitus</i>                         | b     | wet    | nat   |        | 0.17            | 0.07       | 0.10       | 0.00       | 0.00       | 2                   | 0                       |
| <i>Bolboschoenus laticarpus</i>                   | r     | hel    | nat   | C4     | 0.83            | 0.13       | 0.83       | 0.00       | 0.05       | 3                   | 5                       |
| <i>Bolboschoenus maritimus</i> agg.               | r     | hel    | nat   |        | 0.90            | 0.50       | 0.87       | 0.20       | 0.58       | 4                   | 12                      |
| <i>Bolboschoenus yagara</i>                       | r     | hel    | nat   | C3     | 0.13            | 0.00       | 0.13       | 0.00       | 0.00       | 1                   | 0                       |
| <i>Brassica napus</i> Napus Group                 | c     | ter    | arch  |        | 0.20            | 0.00       | 0.20       | 0.00       | 0.00       | 1                   | 0                       |
| <i>Bromus</i> cf. <i>japonicus</i>                | w     | ter    | arch  | C4     | 0.03            | 0.00       | 0.00       | 0.03       | 0.00       | 1                   | 0                       |
| <i>Bromus hordeaceus</i> subsp. <i>hordeaceus</i> | w     | ter    | arch  |        | 0.03            | 0.03       | 0.00       | 0.00       | 0.00       | 1                   | 0                       |
| <i>Buglossoides arvensis</i> agg.                 | w     | ter    | arch  |        | 0.03            | 0.00       | 0.03       | 0.00       | 0.00       | 1                   | 0                       |
| <i>Calamagrostis epigejos</i>                     | w     | ter    | nat   |        | 0.13            | 0.07       | 0.07       | 0.10       | 0.00       | 3                   | 0                       |
| <i>Callitriche palustris</i>                      | saq   | flo    | nat   |        | 0.33            | 0.23       | 0.13       | 0.00       | 0.30       | 3                   | 1                       |
| <i>Callitriche</i> sp.                            | aq    | flo    | nat   |        | 0.07            | 0.00       | 0.07       | 0.00       | 0.00       | 1                   | 0                       |
| <i>Calystegia sepium</i>                          | m     | ter    | nat   |        | 0.23            | 0.20       | 0.03       | 0.07       | 0.00       | 3                   | 0                       |
| <i>Campanula patula</i>                           | g     | ter    | nat   |        | 0.20            | 0.07       | 0.10       | 0.03       | 0.00       | 3                   | 0                       |
| <i>Capsella bursa-pastoris</i>                    | w     | ter    | arch  |        | 0.13            | 0.10       | 0.07       | 0.10       | 0.00       | 3                   | 0                       |

| species                          | ecol. | funct. | orig. | threat | freq. all years | freq. 2014 | freq. 2015 | freq. 2016 | freq. 2019 | years of occurrence | dominants |
|----------------------------------|-------|--------|-------|--------|-----------------|------------|------------|------------|------------|---------------------|-----------|
| <i>Cardamine amara</i>           | s     | hel    | nat   |        | 0.03            | 0.00       | 0.03       | 0.00       | 0.00       | 1                   | 0         |
| <i>Carex acuta</i>               | r     | hel    | nat   |        | 0.90            | 0.90       | 0.43       | 0.50       | 0.42       | 4                   | 25        |
| <i>Carex bohémica</i>            | b     | wet    | nat   | C4     | 0.70            | 0.20       | 0.70       | 0.00       | 0.32       | 3                   | 0         |
| <i>Carex hirta</i>               | g     | ter    | nat   |        | 0.67            | 0.60       | 0.20       | 0.20       | 0.11       | 4                   | 1         |
| <i>Carex nigra</i>               | s     | hel    | nat   |        | 0.03            | 0.03       | 0.00       | 0.00       | 0.00       | 1                   | 0         |
| <i>Carex vesicaria</i>           | r     | hel    | nat   |        | 0.23            | 0.23       | 0.03       | 0.00       | 0.00       | 2                   | 0         |
| <i>Centaurea cyanus</i>          | w     | ter    | arch  |        | 0.10            | 0.07       | 0.07       | 0.00       | 0.00       | 2                   | 0         |
| <i>Centaurea jacea</i>           | g     | ter    | nat   |        | 0.23            | 0.00       | 0.23       | 0.00       | 0.00       | 1                   | 0         |
| <i>Cerastium dubium</i>          | b     | wet    | nat   | C2     | 0.57            | 0.23       | 0.50       | 0.43       | 0.58       | 4                   | 8         |
| <i>Cerastium glomeratum</i>      | w     | ter    | nat   |        | 0.13            | 0.07       | 0.03       | 0.07       | 0.05       | 4                   | 0         |
| <i>Cerastium holosteoides</i>    | g     | ter    | nat   |        | 0.33            | 0.17       | 0.17       | 0.17       | 0.00       | 3                   | 0         |
| <i>Cirsium arvense</i>           | w     | ter    | arch  |        | 0.40            | 0.13       | 0.20       | 0.20       | 0.05       | 4                   | 0         |
| <i>Cirsium vulgare</i>           | w     | ter    | nat   |        | 0.57            | 0.17       | 0.10       | 0.50       | 0.05       | 4                   | 0         |
| <i>Citrullus lanatus</i>         | c     | ter    | arch  |        | 0.03            | 0.03       | 0.00       | 0.00       | 0.00       | 1                   | 0         |
| <i>Coleanthus subtilis</i>       | b     | wet    | nat   | C3     | 0.77            | 0.17       | 0.77       | 0.00       | 0.47       | 3                   | 9         |
| <i>Convolvulus arvensis</i>      | w     | ter    | arch  |        | 0.03            | 0.03       | 0.00       | 0.00       | 0.00       | 1                   | 0         |
| <i>Conyza canadensis</i>         | w     | ter    | neo   |        | 0.70            | 0.37       | 0.47       | 0.23       | 0.53       | 4                   | 0         |
| <i>Cuscuta campestris</i>        | g     | ter    | neo   |        | 0.33            | 0.00       | 0.30       | 0.00       | 0.16       | 2                   | 0         |
| <i>Cyperus fuscus</i>            | b     | wet    | nat   | C3     | 0.20            | 0.00       | 0.03       | 0.00       | 0.26       | 2                   | 0         |
| <i>Cystopteris fragilis</i>      | rc    | ter    | nat   |        | 0.03            | 0.03       | 0.00       | 0.00       | 0.00       | 1                   | 0         |
| <i>Dactylis glomerata</i>        | g     | ter    | nat   |        | 0.23            | 0.07       | 0.03       | 0.17       | 0.00       | 3                   | 0         |
| <i>Descurainia sophia</i>        | w     | ter    | arch  |        | 0.07            | 0.03       | 0.03       | 0.00       | 0.00       | 2                   | 0         |
| <i>Deschampsia cespitosa</i>     | g     | ter    | nat   |        | 0.23            | 0.10       | 0.13       | 0.10       | 0.00       | 3                   | 0         |
| <i>Dianthus deltoides</i>        | g     | ter    | nat   |        | 0.03            | 0.00       | 0.00       | 0.03       | 0.00       | 1                   | 0         |
| <i>Echinochloa crus-galli</i>    | w     | ter    | arch  |        | 0.70            | 0.20       | 0.67       | 0.10       | 0.05       | 4                   | 0         |
| <i>Elatine hydropiper</i>        | saq   | amph   | nat   | C3     | 0.53            | 0.17       | 0.50       | 0.07       | 0.53       | 4                   | 12        |
| <i>Eleocharis acicularis</i>     | saq   | amph   | nat   |        | 0.33            | 0.20       | 0.20       | 0.00       | 0.32       | 3                   | 2         |
| <i>Eleocharis ovata</i>          | b     | wet    | nat   | C4     | 0.47            | 0.20       | 0.47       | 0.00       | 0.16       | 3                   | 0         |
| <i>Eleocharis palustris</i>      | r     | hel    | nat   |        | 0.23            | 0.20       | 0.03       | 0.00       | 0.00       | 2                   | 0         |
| <i>Elymus repens</i>             | w     | ter    | nat   |        | 0.37            | 0.27       | 0.10       | 0.07       | 0.00       | 3                   | 0         |
| <i>Epilobium adenocaulon</i>     | b     | wet    | neo   |        | 0.83            | 0.40       | 0.77       | 0.03       | 0.00       | 3                   | 0         |
| <i>Epilobium hirsutum</i>        | r     | hel    | nat   |        | 0.37            | 0.00       | 0.37       | 0.03       | 0.00       | 2                   | 0         |
| <i>Epilobium parviflorum</i>     | r     | hel    | nat   | C3     | 0.20            | 0.00       | 0.20       | 0.00       | 0.00       | 1                   | 0         |
| <i>Epilobium roseum</i>          | r     | hel    | nat   |        | 0.03            | 0.00       | 0.03       | 0.00       | 0.00       | 1                   | 0         |
| <i>Epilobium</i> sp.             | –     | –      | –     |        | 0.83            | 0.27       | 0.17       | 0.73       | 0.05       | 3                   | 0         |
| <i>Epilobium tetragonum</i> agg. | w     | ter    | nat   |        | 0.57            | 0.07       | 0.53       | 0.00       | 0.00       | 2                   | 0         |
| <i>Equisetum arvense</i>         | w     | ter    | nat   |        | 0.17            | 0.13       | 0.03       | 0.07       | 0.00       | 3                   | 0         |
| <i>Equisetum palustre</i>        | g     | ter    | nat   |        | 0.03            | 0.00       | 0.03       | 0.00       | 0.00       | 1                   | 0         |
| <i>Erigeron annuus</i>           | w     | ter    | neo   |        | 0.03            | 0.00       | 0.00       | 0.00       | 0.03       | 1                   | 0         |
| <i>Erodium cicutarium</i>        | w     | ter    | arch  |        | 0.07            | 0.00       | 0.03       | 0.03       | 0.00       | 2                   | 0         |
| <i>Erophila verna</i>            | e     | ter    | nat   |        | 0.17            | 0.07       | 0.13       | 0.03       | 0.00       | 3                   | 0         |
| <i>Erysimum cheiranthoides</i>   | w     | ter    | arch  |        | 0.03            | 0.00       | 0.03       | 0.03       | 0.00       | 1                   | 0         |
| <i>Euphorbia peplus</i>          | w     | ter    | arch  |        | 0.03            | 0.00       | 0.03       | 0.00       | 0.00       | 1                   | 0         |
| <i>Fallopia convolvulus</i>      | w     | ter    | arch  |        | 0.10            | 0.07       | 0.10       | 0.00       | 0.00       | 2                   | 0         |
| <i>Fallopia dumetorum</i>        | tf    | ter    | nat   |        | 0.07            | 0.03       | 0.07       | 0.00       | 0.00       | 2                   | 0         |
| <i>Fallopia</i> sp.              | –     | ter    | –     |        | 0.10            | 0.10       | 0.00       | 0.00       | 0.00       | 1                   | 0         |
| <i>Ficaria verna</i>             | f     | ter    | nat   |        | 0.23            | 0.00       | 0.10       | 0.03       | 0.00       | 2                   | 0         |
| <i>Filipendula ulmaria</i>       | f     | ter    | nat   |        | 0.10            | 0.07       | 0.00       | 0.03       | 0.00       | 2                   | 0         |
| <i>Galeopsis bifida</i>          | w     | ter    | nat   |        | 0.10            | 0.07       | 0.07       | 0.03       | 0.00       | 3                   | 0         |
| <i>Galeopsis</i> sp.             | w     | ter    | nat   |        | 0.57            | 0.27       | 0.30       | 0.13       | 0.03       | 4                   | 0         |
| <i>Galeopsis tetrahit</i>        | w     | ter    | nat   |        | 0.03            | 0.00       | 0.03       | 0.00       | 0.00       | 1                   | 0         |

| species                        | ecol. | funct. | orig. | threat | freq. all years | freq. 2014 | freq. 2015 | freq. 2016 | freq. 2019 | years of occurrence | dominants |
|--------------------------------|-------|--------|-------|--------|-----------------|------------|------------|------------|------------|---------------------|-----------|
| <i>Galinsoga quadriradiata</i> | w     | ter    | neo   |        | 0.03            | 0.00       | 0.03       | 0.00       | 0.00       | 1                   | 0         |
| <i>Galium aparine</i>          | w     | ter    | nat   |        | 0.83            | 0.50       | 0.50       | 0.53       | 0.00       | 3                   | 0         |
| <i>Galium palustre</i> agg.    | r     | hel    | nat   |        | 0.53            | 0.53       | 0.07       | 0.03       | 0.05       | 4                   | 0         |
| <i>Geranium dissectum</i>      | w     | ter    | arch  |        | 0.10            | 0.07       | 0.03       | 0.00       | 0.00       | 2                   | 0         |
| <i>Geranium pusillum</i>       | w     | ter    | arch  |        | 0.13            | 0.10       | 0.03       | 0.10       | 0.00       | 3                   | 1         |
| <i>Geranium robertianum</i>    | f     | ter    | nat   |        | 0.27            | 0.23       | 0.07       | 0.10       | 0.00       | 3                   | 0         |
| <i>Geum urbanum</i>            | f     | ter    | nat   |        | 0.17            | 0.07       | 0.03       | 0.10       | 0.00       | 3                   | 0         |
| <i>Glechoma hederacea</i>      | g     | ter    | nat   |        | 0.20            | 0.13       | 0.00       | 0.07       | 0.00       | 2                   | 0         |
| <i>Glyceria declinata</i>      | r     | hel    | nat   |        | 0.17            | 0.00       | 0.17       | 0.00       | 0.00       | 1                   | 0         |
| <i>Glyceria fluitans</i>       | r     | hel    | nat   |        | 0.10            | 0.03       | 0.00       | 0.07       | 0.00       | 2                   | 0         |
| <i>Glyceria maxima</i>         | r     | hel    | nat   |        | 0.47            | 0.47       | 0.10       | 0.40       | 0.21       | 4                   | 3         |
| <i>Glyceria notata</i>         | r     | hel    | nat   |        | 0.17            | 0.00       | 0.13       | 0.03       | 0.00       | 2                   | 0         |
| <i>Gnaphalium uliginosum</i>   | b     | wet    | nat   |        | 0.70            | 0.30       | 0.70       | 0.03       | 0.11       | 4                   | 5         |
| <i>Gypsophila muralis</i>      | b     | wet    | nat   |        | 0.20            | 0.03       | 0.13       | 0.03       | 0.13       | 4                   | 0         |
| <i>Holcus lanatus</i>          | g     | ter    | nat   |        | 0.10            | 0.00       | 0.00       | 0.10       | 0.00       | 1                   | 0         |
| <i>Hordeum vulgare</i>         | c     | ter    | arch  |        | 0.10            | 0.00       | 0.10       | 0.00       | 0.00       | 1                   | 0         |
| <i>Hypericum perforatum</i>    | m     | ter    | nat   |        | 0.07            | 0.03       | 0.03       | 0.00       | 0.00       | 2                   | 0         |
| <i>Hypochaeris radicata</i>    | g     | ter    | nat   |        | 0.30            | 0.00       | 0.23       | 0.03       | 0.20       | 3                   | 0         |
| <i>Chara braunii</i>           | aq    | sub    | nat   | C3     | 0.20            | 0.03       | 0.17       | 0.00       | 0.00       | 2                   | 0         |
| <i>Chelidonium majus</i>       | m     | ter    | arch  |        | 0.07            | 0.07       | 0.00       | 0.03       | 0.00       | 2                   | 0         |
| <i>Chenopodium album</i> s. l. | w     | ter    | nat   |        | 0.67            | 0.20       | 0.53       | 0.07       | 0.00       | 3                   | 0         |
| <i>Chenopodium ficifolium</i>  | b     | wet    | nat   |        | 0.77            | 0.20       | 0.73       | 0.20       | 0.11       | 4                   | 0         |
| <i>Chenopodium glaucum</i>     | b     | wet    | nat   |        | 0.63            | 0.17       | 0.57       | 0.00       | 0.16       | 3                   | 0         |
| <i>Chenopodium polyspermum</i> | w     | ter    | nat   |        | 0.43            | 0.07       | 0.37       | 0.03       | 0.05       | 4                   | 0         |
| <i>Chenopodium rubrum</i>      | b     | wet    | nat   |        | 0.57            | 0.03       | 0.57       | 0.00       | 0.05       | 4                   | 0         |
| <i>Impatiens noli-tangere</i>  | m     | ter    | nat   |        | 0.07            | 0.03       | 0.03       | 0.00       | 0.00       | 2                   | 0         |
| <i>Impatiens parviflora</i>    | f     | ter    | neo   |        | 0.20            | 0.13       | 0.13       | 0.03       | 0.00       | 3                   | 0         |
| <i>Iris pseudacorus</i>        | r     | hel    | nat   |        | 0.30            | 0.23       | 0.03       | 0.03       | 0.03       | 4                   | 0         |
| <i>Isolepis setacea</i>        | b     | wet    | nat   | C3     | 0.20            | 0.07       | 0.17       | 0.00       | 0.05       | 3                   | 0         |
| <i>Juncus articulatus</i>      | b     | wet    | nat   |        | 0.73            | 0.47       | 0.53       | 0.30       | 0.37       | 4                   | 0         |
| <i>Juncus bufonius</i>         | b     | wet    | nat   |        | 0.93            | 0.37       | 0.87       | 0.10       | 0.79       | 4                   | 16        |
| <i>Juncus compressus</i>       | g     | ter    | nat   |        | 0.13            | 0.10       | 0.07       | 0.03       | 0.00       | 3                   | 0         |
| <i>Juncus effusus</i>          | r     | hel    | nat   |        | 0.53            | 0.40       | 0.33       | 0.43       | 0.00       | 3                   | 9         |
| <i>Juncus tenuis</i>           | w     | ter    | neo   |        | 0.17            | 0.10       | 0.07       | 0.03       | 0.00       | 3                   | 0         |
| <i>Lactuca serriola</i>        | w     | ter    | arch  |        | 0.33            | 0.07       | 0.20       | 0.07       | 0.05       | 4                   | 0         |
| <i>Lamium album</i>            | m     | ter    | arch  |        | 0.03            | 0.00       | 0.03       | 0.00       | 0.00       | 1                   | 0         |
| <i>Lamium purpureum</i>        | w     | ter    | arch  |        | 0.20            | 0.03       | 0.10       | 0.20       | 0.00       | 3                   | 1         |
| <i>Lapsana communis</i>        | m     | ter    | arch  |        | 0.27            | 0.13       | 0.10       | 0.10       | 0.00       | 3                   | 0         |
| <i>Lathyrus pratensis</i>      | g     | ter    | nat   |        | 0.03            | 0.00       | 0.03       | 0.00       | 0.00       | 1                   | 0         |
| <i>Leersia oryzoides</i>       | r     | hel    | nat   | C3     | 0.43            | 0.20       | 0.37       | 0.00       | 0.11       | 3                   | 0         |
| <i>Lemna gibba</i>             | aq    | free   | nat   |        | 0.73            | 0.37       | 0.27       | 0.50       | 0.16       | 4                   | 0         |
| <i>Lemna minor</i>             | aq    | free   | nat   |        | 0.50            | 0.47       | 0.00       | 0.03       | 0.00       | 2                   | 0         |
| <i>Limosella aquatica</i>      | b     | wet    | nat   | C4     | 0.60            | 0.30       | 0.53       | 0.00       | 0.68       | 3                   | 5         |
| <i>Lindernia procumbens</i>    | b     | wet    | nat   | C1     | 0.03            | 0.00       | 0.03       | 0.00       | 0.00       | 1                   | 0         |
| <i>Lolium multiflorum</i>      | g     | ter    | neo   |        | 0.13            | 0.07       | 0.07       | 0.03       | 0.00       | 1                   | 0         |
| <i>Lolium perenne</i>          | g     | ter    | nat   |        | 0.30            | 0.00       | 0.27       | 0.10       | 0.00       | 2                   | 0         |
| <i>Lotus corniculatus</i>      | g     | ter    | nat   |        | 0.47            | 0.10       | 0.33       | 0.17       | 0.00       | 3                   | 0         |
| <i>Lycopus europaeus</i>       | r     | hel    | nat   |        | 0.80            | 0.77       | 0.30       | 0.07       | 0.00       | 3                   | 0         |
| <i>Lychnis flos-cuculi</i>     | g     | ter    | nat   |        | 0.10            | 0.00       | 0.00       | 0.10       | 0.00       | 1                   | 0         |
| <i>Lysimachia nummularia</i>   | g     | ter    | nat   |        | 0.53            | 0.47       | 0.03       | 0.20       | 0.00       | 3                   | 0         |
| <i>Lysimachia vulgaris</i>     | r     | hel    | nat   |        | 0.73            | 0.70       | 0.03       | 0.17       | 0.00       | 3                   | 0         |

| species                                                  | ecol. | funct. | orig. | threat | freq. all years | freq. 2014 | freq. 2015 | freq. 2016 | freq. 2019 | years of occurrence | dominants |
|----------------------------------------------------------|-------|--------|-------|--------|-----------------|------------|------------|------------|------------|---------------------|-----------|
| <i>Lythrum hyssopifolia</i>                              | b     | wet    | nat   | C2     | 0.30            | 0.20       | 0.20       | 0.00       | 0.37       | 3                   | 0         |
| <i>Lythrum salicaria</i>                                 | r     | hel    | nat   |        | 0.90            | 0.90       | 0.47       | 0.40       | 0.05       | 4                   | 0         |
| <i>Matricaria discoidea</i>                              | w     | ter    | neo   |        | 0.10            | 0.03       | 0.10       | 0.00       | 0.00       | 2                   | 0         |
| <i>Matricaria chamomilla</i>                             | w     | ter    | arch  |        | 0.10            | 0.00       | 0.07       | 0.00       | 0.05       | 2                   | 0         |
| <i>Medicago lupulina</i>                                 | w     | ter    | nat   |        | 0.10            | 0.03       | 0.10       | 0.03       | 0.00       | 3                   | 0         |
| <i>Melilotus albus</i>                                   | w     | ter    | arch  |        | 0.03            | 0.00       | 0.03       | 0.00       | 0.00       | 1                   | 0         |
| <i>Melilotus</i> sp. juv.                                | w     | ter    | –     |        | 0.03            | 0.00       | 0.03       | 0.00       | 0.00       | 1                   | 0         |
| <i>Mentha arvensis</i>                                   | g     | ter    | nat   |        | 0.07            | 0.03       | 0.00       | 0.00       | 0.00       | 1                   | 0         |
| <i>Mentha x verticillata</i>                             | r     | hel    | nat   |        | 0.03            | 0.03       | 0.00       | 0.00       | 0.00       | 1                   | 0         |
| <i>Montia arvensis</i>                                   | b     | wet    | nat   | C1     | 0.47            | 0.27       | 0.43       | 0.33       | 0.53       | 4                   | 6         |
| <i>Myosotis arvensis</i>                                 | w     | ter    | arch  |        | 0.20            | 0.13       | 0.13       | 0.03       | 0.00       | 3                   | 0         |
| <i>Myosotis caespitosa</i>                               | r     | hel    | nat   | C4     | 0.73            | 0.67       | 0.57       | 0.20       | 0.47       | 4                   | 0         |
| <i>Myosotis ramosissima</i>                              | e     | ter    | nat   |        | 0.03            | 0.00       | 0.03       | 0.00       | 0.00       | 1                   | 0         |
| <i>Myosotis stricta</i>                                  | e     | ter    | nat   |        | 0.07            | 0.07       | 0.03       | 0.03       | 0.00       | 3                   | 0         |
| <i>Myosoton aquaticum</i>                                | b     | wet    | nat   |        | 0.97            | 0.60       | 0.83       | 0.47       | 0.16       | 4                   | 2         |
| <i>Myosurus minimus</i>                                  | b     | wet    | nat   | C3     | 0.93            | 0.40       | 0.93       | 0.47       | 0.68       | 4                   | 17        |
| <i>Oenanthe aquatica</i>                                 | r     | hel    | nat   |        | 0.90            | 0.57       | 0.90       | 0.13       | 0.26       | 4                   | 1         |
| <i>Oenothera</i> sp.                                     | w     | ter    | neo   |        | 0.03            | 0.03       | 0.00       | 0.00       | 0.00       | 1                   | 0         |
| <i>Papaver rhoeas</i>                                    | w     | ter    | arch  |        | 0.07            | 0.03       | 0.07       | 0.00       | 0.00       | 2                   | 0         |
| <i>Papaver somniferum</i>                                | c     | ter    | arch  |        | 0.03            | 0.00       | 0.03       | 0.00       | 0.00       | 1                   | 0         |
| <i>Parthenocissus</i> sp.                                | m     | ter    | neo   |        | 0.03            | 0.03       | 0.03       | 0.00       | 0.00       | 2                   | 0         |
| <i>Peplis portula</i>                                    | b     | wet    | nat   |        | 0.53            | 0.33       | 0.40       | 0.00       | 0.58       | 3                   | 1         |
| <i>Persicaria amphibia</i>                               | saq   | flo    | nat   |        | 0.93            | 0.90       | 0.67       | 0.70       | 0.58       | 4                   | 7         |
| <i>Persicaria hydropiper</i>                             | b     | wet    | nat   |        | 1.00            | 0.87       | 1.00       | 0.33       | 0.42       | 4                   | 1         |
| <i>Persicaria lapathifolia</i>                           | b     | wet    | nat   |        | 0.97            | 0.43       | 0.97       | 0.17       | 0.26       | 4                   | 2         |
| <i>Persicaria lapathifolia</i> subsp. <i>brittingeri</i> | b     | wet    | nat   |        | 0.03            | 0.00       | 0.03       | 0.00       | 0.00       | 1                   | 0         |
| <i>Persicaria maculosa</i>                               | w     | ter    | nat   |        | 0.10            | 0.03       | 0.00       | 0.07       | 0.03       | 3                   | 0         |
| <i>Persicaria minor</i>                                  | b     | wet    | nat   |        | 0.47            | 0.07       | 0.43       | 0.03       | 0.00       | 3                   | 0         |
| <i>Phalaris arundinacea</i>                              | r     | hel    | nat   |        | 1.00            | 1.00       | 0.97       | 1.00       | 0.58       | 4                   | 53        |
| <i>Phleum pratense</i>                                   | g     | ter    | nat   |        | 0.30            | 0.00       | 0.30       | 0.00       | 0.00       | 1                   | 0         |
| <i>Phragmites australis</i>                              | r     | hel    | nat   |        | 0.40            | 0.27       | 0.33       | 0.40       | 0.26       | 4                   | 22        |
| <i>Plantago lanceolata</i>                               | g     | ter    | nat   |        | 0.10            | 0.00       | 0.03       | 0.10       | 0.00       | 2                   | 0         |
| <i>Plantago major</i> s. l.                              | –     | ter    | nat   |        | 0.10            | 0.10       | 0.00       | 0.00       | 0.00       | 1                   | 0         |
| <i>Plantago major</i> s. str                             | w     | ter    | nat   |        | 0.07            | 0.03       | 0.03       | 0.00       | 0.00       | 2                   | 0         |
| <i>Plantago uliginosa</i>                                | b     | wet    | nat   |        | 0.67            | 0.27       | 0.53       | 0.33       | 0.13       | 4                   | 1         |
| <i>Poa annua</i>                                         | w     | ter    | nat   |        | 0.80            | 0.37       | 0.53       | 0.50       | 0.37       | 4                   | 0         |
| <i>Poa humilis</i>                                       | g     | ter    | nat   |        | 0.03            | 0.03       | 0.00       | 0.00       | 0.00       | 1                   | 0         |
| <i>Poa nemoralis</i>                                     | f     | ter    | nat   |        | 0.03            | 0.03       | 0.00       | 0.00       | 0.00       | 1                   | 0         |
| <i>Poa palustris</i>                                     | r     | hel    | nat   |        | 1.00            | 0.87       | 0.93       | 0.67       | 0.10       | 4                   | 14        |
| <i>Poa pratensis</i> agg.                                | g     | ter    | nat   |        | 0.07            | 0.03       | 0.00       | 0.03       | 0.00       | 2                   | 0         |
| <i>Poa trivialis</i>                                     | g     | ter    | nat   |        | 0.93            | 0.57       | 0.87       | 0.57       | 0.53       | 4                   | 1         |
| <i>Polygonum aviculare</i> agg.                          | w     | ter    | nat   |        | 0.33            | 0.10       | 0.23       | 0.03       | 0.00       | 3                   | 0         |
| <i>Populus tremula</i>                                   | f     | tree   | nat   |        | 0.17            | 0.03       | 0.13       | 0.00       | 0.00       | 2                   | 0         |
| <i>Populus x canadensis</i>                              | f     | tree   | neo   |        | 0.07            | 0.07       | 0.03       | 0.00       | 0.00       | 2                   | 0         |
| <i>Potamogeton crispus</i>                               | aq    | sub    | nat   |        | 0.10            | 0.00       | 0.03       | 0.07       | 0.00       | 2                   | 0         |
| <i>Potamogeton pusillus</i>                              | aq    | sub    | nat   |        | 0.07            | 0.03       | 0.03       | 0.00       | 0.00       | 2                   | 0         |
| <i>Potentilla anserina</i>                               | g     | ter    | nat   |        | 0.47            | 0.33       | 0.13       | 0.30       | 0.11       | 4                   | 0         |
| <i>Potentilla argentea</i>                               | g     | ter    | nat   |        | 0.03            | 0.00       | 0.00       | 0.03       | 0.00       | 1                   | 0         |
| <i>Potentilla norvegica</i>                              | b     | wet    | nat   |        | 0.27            | 0.07       | 0.07       | 0.20       | 0.00       | 3                   | 0         |
| <i>Potentilla reptans</i>                                | g     | ter    | nat   |        | 0.13            | 0.13       | 0.00       | 0.00       | 0.00       | 1                   | 0         |
| <i>Potentilla supina</i>                                 | b     | wet    | nat   |        | 0.70            | 0.30       | 0.70       | 0.47       | 0.53       | 4                   | 0         |

| species                                    | ecol. | funct. | orig. | threat | freq. all years | freq. 2014 | freq. 2015 | freq. 2016 | freq. 2019 | years of occurrence | dominants |
|--------------------------------------------|-------|--------|-------|--------|-----------------|------------|------------|------------|------------|---------------------|-----------|
| <i>Prunus avium</i>                        | c     | ter    | nat   |        | 0.03            | 0.00       | 0.00       | 0.03       | 0.00       | 1                   | 0         |
| <i>Prunus</i> sp. juv.                     | m     | tree   | –     |        | 0.07            | 0.03       | 0.03       | 0.00       | 0.00       | 2                   | 0         |
| <i>Prunus spinosa</i>                      | m     | tree   | nat   |        | 0.07            | 0.07       | 0.00       | 0.00       | 0.00       | 1                   | 0         |
| <i>Puccinellia distans</i>                 | b     | wet    | nat   | (C1)   | 0.03            | 0.03       | 0.00       | 0.00       | 0.00       | 1                   | 0         |
| <i>Pyrus pyraeaster</i>                    | f     | tree   | nat   | C4     | 0.03            | 0.03       | 0.00       | 0.00       | 0.00       | 1                   | 0         |
| <i>Quercus petraea</i>                     | f     | tree   | nat   |        | 0.03            | 0.03       | 0.00       | 0.00       | 0.00       | 1                   | 0         |
| <i>Quercus robur</i>                       | f     | tree   | nat   |        | 0.17            | 0.13       | 0.07       | 0.00       | 0.00       | 2                   | 0         |
| <i>Ranunculus acris</i>                    | g     | ter    | nat   |        | 0.03            | 0.00       | 0.03       | 0.00       | 0.00       | 1                   | 0         |
| <i>Ranunculus flammula</i>                 | b     | wet    | nat   |        | 0.67            | 0.43       | 0.60       | 0.33       | 0.26       | 4                   | 0         |
| <i>Ranunculus repens</i>                   | g     | ter    | nat   |        | 0.63            | 0.40       | 0.20       | 0.33       | 0.00       | 3                   | 0         |
| <i>Ranunculus sceleratus</i>               | b     | wet    | nat   |        | 1.00            | 0.80       | 1.00       | 0.47       | 0.79       | 4                   | 14        |
| <i>Rorippa palustris</i>                   | b     | wet    | nat   |        | 1.00            | 0.70       | 0.80       | 0.30       | 0.68       | 4                   | 4         |
| <i>Rorippa sylvestris</i>                  | b     | wet    | nat   |        | 0.07            | 0.07       | 0.00       | 0.00       | 0.00       | 1                   | 0         |
| <i>Rosa canina</i> agg.                    | m     | tree   | nat   |        | 0.07            | 0.07       | 0.00       | 0.00       | 0.00       | 1                   | 0         |
| <i>Rubus caesius</i>                       | f     | ter    | nat   |        | 0.27            | 0.27       | 0.00       | 0.03       | 0.00       | 2                   | 0         |
| <i>Rubus fruticosus</i> agg.               | m     | tree   | nat   |        | 0.10            | 0.10       | 0.03       | 0.00       | 0.00       | 2                   | 0         |
| <i>Rumex acetosa</i>                       | g     | ter    | nat   |        | 0.07            | 0.00       | 0.00       | 0.07       | 0.00       | 1                   | 0         |
| <i>Rumex acetosella</i>                    | g     | ter    | nat   |        | 0.07            | 0.00       | 0.00       | 0.07       | 0.00       | 1                   | 0         |
| <i>Rumex crispus</i>                       | g     | ter    | nat   |        | 0.47            | 0.23       | 0.13       | 0.27       | 0.00       | 3                   | 0         |
| <i>Rumex maritimus</i>                     | b     | wet    | nat   |        | 0.97            | 0.70       | 0.87       | 0.23       | 0.68       | 4                   | 11        |
| <i>Rumex obtusifolius</i>                  | w     | ter    | nat   |        | 0.60            | 0.23       | 0.30       | 0.43       | 0.00       | 3                   | 0         |
| <i>Rumex sanguineus</i>                    | f     | ter    | nat   |        | 0.03            | 0.03       | 0.00       | 0.00       | 0.00       | 1                   | 0         |
| <i>Sagina procumbens</i>                   | w     | ter    | nat   |        | 0.47            | 0.40       | 0.17       | 0.27       | 0.32       | 4                   | 0         |
| <i>Salix alba</i>                          | wet-s | tree   | nat   |        | 0.10            | 0.07       | 0.03       | 0.00       | 0.00       | 2                   | 0         |
| <i>Salix cinerea</i>                       | wet-s | tree   | nat   |        | 0.77            | 0.70       | 0.50       | 0.63       | 0.37       | 4                   | 43        |
| <i>Salix fragilis</i>                      | wet-s | tree   | nat   |        | 0.33            | 0.27       | 0.07       | 0.17       | 0.00       | 3                   | 0         |
| <i>Salix matsudana</i> 'Tortuosa'          | c     | tree   | neo   |        | 0.10            | 0.07       | 0.03       | 0.00       | 0.00       | 2                   | 0         |
| <i>Salix purpurea</i>                      | wet-s | tree   | nat   |        | 0.07            | 0.07       | 0.03       | 0.00       | 0.00       | 2                   | 0         |
| <i>Salix</i> sp. juv.                      | wet-s | tree   | –     |        | 0.20            | 0.03       | 0.20       | 0.00       | 0.03       | 3                   | 0         |
| <i>Salix triandra</i>                      | wet-s | tree   | nat   |        | 0.30            | 0.27       | 0.13       | 0.10       | 0.16       | 4                   | 8         |
| <i>Salix x rubens</i>                      | wet-s | tree   | nat   |        | 0.03            | 0.03       | 0.00       | 0.00       | 0.00       | 1                   | 0         |
| <i>Scirpus radicans</i>                    | r     | hel    | nat   | C3     | 0.03            | 0.03       | 0.00       | 0.00       | 0.00       | 1                   | 0         |
| <i>Scirpus sylvaticus</i>                  | g     | ter    | nat   |        | 0.03            | 0.00       | 0.00       | 0.03       | 0.00       | 1                   | 0         |
| <i>Scorzonoides autumnalis</i>             | g     | ter    | nat   |        | 0.10            | 0.07       | 0.00       | 0.03       | 0.00       | 2                   | 0         |
| <i>Scrophularia nodosa</i>                 | m     | ter    | nat   |        | 0.07            | 0.03       | 0.03       | 0.03       | 0.00       | 3                   | 0         |
| <i>Scutellaria galericulata</i>            | r     | hel    | nat   |        | 0.30            | 0.20       | 0.10       | 0.00       | 0.00       | 2                   | 0         |
| <i>Secale cereale</i>                      | c     | ter    | arch  |        | 0.10            | 0.00       | 0.10       | 0.00       | 0.00       | 1                   | 0         |
| <i>Sedum spurium</i> /hybridum             | rc    | ter    | neo   |        | 0.03            | 0.03       | 0.00       | 0.00       | 0.00       | 1                   | 0         |
| <i>Senecio sylvaticus</i>                  | m     | ter    | nat   |        | 0.03            | 0.00       | 0.03       | 0.00       | 0.00       | 1                   | 0         |
| <i>Senecio viscosus</i>                    | w     | ter    | nat   |        | 0.13            | 0.03       | 0.07       | 0.07       | 0.00       | 3                   | 0         |
| <i>Setaria pumila</i>                      | w     | ter    | arch  |        | 0.10            | 0.03       | 0.10       | 0.00       | 0.00       | 2                   | 0         |
| <i>Silene latifolia</i> subsp. <i>alba</i> | g     | ter    | arch  |        | 0.10            | 0.03       | 0.03       | 0.03       | 0.00       | 3                   | 0         |
| <i>Solanum dulcamara</i>                   | r     | hel    | nat   |        | 0.57            | 0.50       | 0.07       | 0.13       | 0.00       | 3                   | 0         |
| <i>Sonchus arvensis</i>                    | w     | ter    | arch  |        | 0.10            | 0.03       | 0.07       | 0.00       | 0.00       | 2                   | 0         |
| <i>Sonchus asper</i>                       | w     | ter    | arch  |        | 0.10            | 0.00       | 0.07       | 0.00       | 0.05       | 2                   | 0         |
| <i>Sonchus oleraceus</i>                   | w     | ter    | arch  |        | 0.10            | 0.03       | 0.07       | 0.03       | 0.00       | 3                   | 0         |
| <i>Spergularia kurkae</i>                  | b     | wet    | nat   | C2     | 0.77            | 0.20       | 0.77       | 0.17       | 0.68       | 4                   | 11        |
| <i>Spirodela polyrhiza</i>                 | aq    | free   | nat   |        | 0.67            | 0.57       | 0.17       | 0.37       | 0.21       | 4                   | 0         |
| <i>Stellaria alsine</i>                    | b     | wet    | nat   |        | 0.97            | 0.67       | 0.93       | 0.57       | 0.74       | 4                   | 14        |
| <i>Stellaria graminea</i>                  | g     | ter    | nat   |        | 0.07            | 0.03       | 0.00       | 0.03       | 0.00       | 2                   | 0         |
| <i>Stellaria media</i>                     | w     | ter    | nat   |        | 0.30            | 0.17       | 0.13       | 0.17       | 0.00       | 3                   | 1         |

| species                                 | ecol. | funct. | orig. | threat | freq. all years | freq. 2014 | freq. 2015 | freq. 2016 | freq. 2019 | years of occurrence | dominants |
|-----------------------------------------|-------|--------|-------|--------|-----------------|------------|------------|------------|------------|---------------------|-----------|
| <i>Symphytum officinale</i>             | g     | ter    | nat   |        | 0.07            | 0.07       | 0.00       | 0.00       | 0.00       | 1                   | 0         |
| <i>Tagetes</i> sp.                      | c     | ter    | neo   |        | 0.03            | 0.00       | 0.03       | 0.00       | 0.00       | 1                   | 0         |
| <i>Taraxacum</i> sect. <i>Taraxacum</i> | g     | ter    | nat   |        | 0.80            | 0.40       | 0.33       | 0.53       | 0.00       | 3                   | 0         |
| <i>Thlaspi arvense</i>                  | w     | ter    | arch  |        | 0.20            | 0.07       | 0.10       | 0.10       | 0.00       | 3                   | 0         |
| <i>Trifolium arvense</i>                | g     | ter    | nat   |        | 0.87            | 0.33       | 0.80       | 0.20       | 0.42       | 4                   | 12        |
| <i>Trifolium campestre</i>              | g     | ter    | nat   |        | 0.97            | 0.40       | 0.97       | 0.03       | 0.47       | 4                   | 4         |
| <i>Trifolium dubium</i>                 | g     | ter    | nat   |        | 0.17            | 0.10       | 0.03       | 0.03       | 0.05       | 4                   | 0         |
| <i>Trifolium hybridum</i>               | g     | ter    | neo   |        | 0.93            | 0.47       | 0.90       | 0.43       | 0.47       | 4                   | 15        |
| <i>Trifolium pratense</i>               | g     | ter    | nat   |        | 0.47            | 0.03       | 0.47       | 0.03       | 0.05       | 4                   | 0         |
| <i>Trifolium repens</i>                 | g     | ter    | nat   |        | 0.40            | 0.07       | 0.40       | 0.03       | 0.11       | 4                   | 0         |
| <i>Tripleurospermum inodorum</i>        | w     | ter    | arch  |        | 0.97            | 0.70       | 0.97       | 0.73       | 0.68       | 4                   | 0         |
| <i>Triticosecale rimpaui</i>            | c     | ter    | neo   |        | 0.17            | 0.00       | 0.17       | 0.00       | 0.00       | 1                   | 0         |
| <i>Triticum aestivum</i>                | c     | ter    | arch  |        | 0.37            | 0.03       | 0.37       | 0.00       | 0.00       | 2                   | 0         |
| <i>Tussilago farfara</i>                | w     | ter    | nat   |        | 0.13            | 0.00       | 0.07       | 0.00       | 0.11       | 2                   | 0         |
| <i>Typha angustifolia</i>               | r     | hel    | nat   |        | 0.03            | 0.00       | 0.03       | 0.00       | 0.00       | 1                   | 0         |
| <i>Typha latifolia</i>                  | r     | hel    | nat   |        | 0.10            | 0.00       | 0.07       | 0.00       | 0.05       | 2                   | 0         |
| <i>Typha</i> sp.                        | r     | hel    | nat   |        | 0.17            | 0.00       | 0.10       | 0.00       | 0.11       | 2                   | 0         |
| <i>Ulmus</i> sp. juv.                   | f     | tree   | nat   |        | 0.07            | 0.07       | 0.00       | 0.00       | 0.00       | 1                   | 0         |
| <i>Urtica dioica</i>                    | tf    | ter    | nat   |        | 0.87            | 0.60       | 0.50       | 0.53       | 0.05       | 4                   | 1         |
| <i>Valeriana officinalis</i>            | m     | ter    | nat   |        | 0.03            | 0.00       | 0.00       | 0.03       | 0.00       | 1                   | 0         |
| <i>Valerianella locusta</i>             | e     | ter    | nat   |        | 0.10            | 0.07       | 0.03       | 0.07       | 0.00       | 3                   | 1         |
| <i>Verbascum</i> sp.                    | w     | ter    | nat   |        | 0.03            | 0.03       | 0.03       | 0.00       | 0.00       | 2                   | 0         |
| <i>Veronica anagallis-aquatica</i>      | b     | wet    | nat   |        | 1.00            | 0.87       | 1.00       | 0.43       | 0.95       | 4                   | 17        |
| <i>Veronica arvensis</i>                | g     | ter    | arch  |        | 0.10            | 0.07       | 0.07       | 0.10       | 0.00       | 2                   | 0         |
| <i>Veronica beccabunga</i>              | r     | wet    | nat   |        | 0.33            | 0.00       | 0.33       | 0.03       | 0.05       | 3                   | 0         |
| <i>Veronica hederifolia</i>             | w     | ter    | arch  |        | 0.03            | 0.03       | 0.03       | 0.03       | 0.00       | 3                   | 0         |
| <i>Veronica chamaedrys</i>              | g     | ter    | nat   |        | 0.03            | 0.03       | 0.00       | 0.00       | 0.00       | 1                   | 0         |
| <i>Veronica peregrina</i>               | b     | wet    | neo   |        | 0.53            | 0.07       | 0.40       | 0.03       | 0.32       | 4                   | 2         |
| <i>Veronica persica</i>                 | w     | ter    | neo   |        | 0.07            | 0.03       | 0.03       | 0.00       | 0.00       | 2                   | 0         |
| <i>Veronica scutellata</i>              | b     | wet    | nat   | C4     | 0.17            | 0.13       | 0.07       | 0.03       | 0.05       | 4                   | 0         |
| <i>Veronica serpyllifolia</i>           | g     | ter    | nat   |        | 0.13            | 0.13       | 0.00       | 0.03       | 0.00       | 2                   | 0         |
| <i>Veronica sublobata</i>               | w     | ter    | nat   |        | 0.03            | 0.00       | 0.00       | 0.03       | 0.00       | 1                   | 0         |
| <i>Vicia angustifolia</i>               | g     | ter    | arch  |        | 0.17            | 0.07       | 0.10       | 0.00       | 0.05       | 3                   | 0         |
| <i>Vicia cracca</i>                     | g     | ter    | nat   |        | 0.03            | 0.00       | 0.03       | 0.00       | 0.00       | 1                   | 0         |
| <i>Vicia hirsuta</i>                    | g     | ter    | nat   |        | 0.43            | 0.27       | 0.27       | 0.00       | 0.00       | 2                   | 0         |
| <i>Vicia</i> sp.                        | —     | ter    | —     |        | 0.17            | 0.00       | 0.07       | 0.13       | 0.00       | 2                   | 0         |
| <i>Vicia tetrasperma</i>                | g     | ter    | nat   |        | 0.43            | 0.23       | 0.23       | 0.00       | 0.00       | 2                   | 0         |
| <i>Viola arvensis</i>                   | w     | ter    | nat   |        | 0.07            | 0.07       | 0.03       | 0.03       | 0.00       | 3                   | 0         |
| <i>Zannichellia palustris</i>           | aq    | sub    | nat   |        | 0.43            | 0.17       | 0.33       | 0.00       | 0.58       | 3                   | 7         |
| <i>Zea mays</i>                         | c     | ter    | neo   |        | 0.07            | 0.00       | 0.03       | 0.03       | 0.00       | 2                   | 0         |
