# Supplementary material
Source: MDPI journal article supplement (https://www.mdpi.com/2073-4441/13/11/1569)
Supplement: s1 [file s1]

## Supplementary Material

### Drivers of macrophyte and diatom diversity in a shallow hypertrophic lake

Kateřina Šumberová<sup>1\*</sup>, Ondřej Vild<sup>1</sup>, Michal Ducháček<sup>3</sup>, Martina Fabšičová<sup>1</sup>, Jan Potužák<sup>2</sup>, and Markéta Fránková<sup>4</sup>

\* Correspondence: katerina.sumberova@ibot.cas.cz

**Table S5.** Frequency of occurrence and cumulative numbers of diatom taxa in samples from the Dehtář fishpond throughout all three years and in each year separately. The calculations are based on the complete species data (species list, species quantities), presented in Table S6. **Frequency:** ≥20% bold, ≥50% light green, ≥75% dark green, ≥90% brown. **Cumulative numbers:** ≥100 bold, ≥500 blue, ≥1000 yellow, ≥2000 red.

Each taxon is given a color according to its affiliation to a particular FT group: green – planktonic taxa from FT1 (=centric diatoms from the *Coscinodiscophyceae*, mainly *Aulacoseira*, *Cyclostephanos*, *Cyclotella* and *Stephanodiscus*), red – typically periphytic taxa from FT2 (=adhering to the surface directly by a mucous film such as *Amphora*, *Cocconeis*, *Epithemia* or with a mucilaginous stalk such as taxa with apical pore fields from Achnanthales and Cymbellales), purple – attachable benthic araphid taxa from FT3 (=facultatively periphytic, passively moving diatoms from Fragilariales and the centric diatom *Melosira varians*), yellow – attachable benthic taxa with raphe with fibulae from FT4 (=facultatively periphytic, actively moving diatoms from Bacillariales and Surirellales), blue – motile benthic raphid taxa from FT5 (=epipellic taxa with raphe, actively moving, mainly symmetrical biraphid pennate diatoms – Naviculales with the exception of *Frustulia vulgaris* from the FT2 living in attached colonies of mucilaginous tubes).

|                                                                           | Frequency all years – number of samples with the species |             |      | Frequency 2015 – number of samples with the species |             |     | Frequency 2016 – number of samples with the species |             |     | Frequency 2019 – number of samples with the species |       |     |
|---------------------------------------------------------------------------|----------------------------------------------------------|-------------|------|-----------------------------------------------------|-------------|-----|-----------------------------------------------------|-------------|-----|-----------------------------------------------------|-------|-----|
|                                                                           | Frequency (%)                                            |             |      | Frequency (%) – 2015                                |             |     | Frequency (%) – 2016                                |             |     | Frequency (%) 2019                                  |       |     |
|                                                                           | cumulative number                                        |             |      | cumulative number 2015                              |             |     | cumulative number 2016                              |             |     | cumulative number 2019                              |       |     |
|                                                                           | n=58                                                     |             |      | n=21                                                |             |     | n=29                                                |             |     | n=8                                                 |       |     |
| <i>Achnanthes</i> sp.                                                     | 8                                                        | 0.137931034 | 11   | 3                                                   | 0.142857143 | 4   | 2                                                   | 0.068965517 | 3   | 3                                                   | 0.375 | 4   |
| <i>Achnanthidium catenatum</i> (Bilý & Marvan) Lange-Bertalot             | 2                                                        | 0.034482759 | 2    | 2                                                   | 0.095238095 | 2   | 0                                                   | 0           | 0   | 0                                                   | 0     | 0   |
| <i>Achnanthidium</i> cf. <i>affine</i> (Grunow) Czamecki                  | 2                                                        | 0.034482759 | 7    | 0                                                   | 0           | 0   | 2                                                   | 0.068965517 | 7   | 0                                                   | 0     | 0   |
| <i>Achnanthidium minutissimum</i> (Kützing) Czamecki                      | 34                                                       | 0.586206897 | 930  | 2                                                   | 0.095238095 | 6   | 25                                                  | 0.862068966 | 770 | 7                                                   | 0.875 | 154 |
| <i>Achnanthidium saprophilum</i> (Kobayasi & Mayama) Round & Bukhtiyarova | 47                                                       | 0.810344828 | 1070 | 12                                                  | 0.571428571 | 49  | 27                                                  | 0.931034483 | 903 | 8                                                   | 1     | 118 |
| <i>Adlafia minuscula</i> (Grunow) Lange-Bertalot                          | 4                                                        | 0.068965517 | 8    | 4                                                   | 0.19047619  | 8   | 0                                                   | 0           | 0   | 0                                                   | 0     | 0   |
| <i>Amphora copulata</i> (Kützing) Schoeman & Archibald                    | 10                                                       | 0.172413793 | 21   | 10                                                  | 0.476190476 | 21  | 0                                                   | 0           | 0   | 0                                                   | 0     | 0   |
| <i>Amphora lange-bertalotii</i> Levkov & Metzeltin                        | 9                                                        | 0.155172414 | 21   | 0                                                   | 0           | 0   | 4                                                   | 0.137931034 | 8   | 5                                                   | 0.625 | 13  |
| <i>Amphora ovalis</i> (Kützing) Kützing                                   | 12                                                       | 0.206896552 | 29   | 10                                                  | 0.476190476 | 27  | 2                                                   | 0.068965517 | 2   | 0                                                   | 0     | 0   |
| <i>Amphora pediculus</i> (Kützing) Grunow                                 | 3                                                        | 0.051724138 | 3    | 1                                                   | 0.047619048 | 1   | 1                                                   | 0.034482759 | 1   | 1                                                   | 0.125 | 1   |
| <i>Anomoeoneis sphaerophora</i> Pfitzer                                   | 1                                                        | 0.017241379 | 2    | 0                                                   | 0           | 0   | 1                                                   | 0.034482759 | 2   | 0                                                   | 0     | 0   |
| <i>Asterionella formosa</i> Hassall                                       | 1                                                        | 0.017241379 | 1    | 0                                                   | 0           | 0   | 1                                                   | 0.034482759 | 1   | 0                                                   | 0     | 0   |
| <i>Aulacoseira ambigua</i> (Grunow) Simonsen                              | 49                                                       | 0.844827586 | 517  | 17                                                  | 0.80952381  | 162 | 24                                                  | 0.827586207 | 275 | 8                                                   | 1     | 80  |
| <i>Aulacoseira muzzanensis</i> (F.Meister) Krammer                        | 6                                                        | 0.103448276 | 13   | 5                                                   | 0.238095238 | 12  | 1                                                   | 0.034482759 | 1   | 0                                                   | 0     | 0   |
| <i>Aulacoseira</i> sp.                                                    | 17                                                       | 0.293103448 | 31   | 8                                                   | 0.380952381 | 13  | 9                                                   | 0.310344828 | 18  | 0                                                   | 0     | 0   |
| <i>Caloneis lancettula</i> (Schulz) Lange-Bertalot & Witkovski            | 6                                                        | 0.103448276 | 12   | 6                                                   | 0.285714286 | 12  | 0                                                   | 0           | 0   | 0                                                   | 0     | 0   |
| <i>Caloneis silicula</i> (Ehrenberg) Cleve                                | 6                                                        | 0.103448276 | 8    | 5                                                   | 0.238095238 | 7   | 1                                                   | 0.034482759 | 1   | 0                                                   | 0     | 0   |
| <i>Cocconeis pediculus</i> Ehrenberg                                      | 2                                                        | 0.034482759 | 2    | 1                                                   | 0.047619048 | 1   | 0                                                   | 0           | 0   | 1                                                   | 0.125 | 1   |
| <i>Cocconeis placentula</i> Ehrenberg                                     | 24                                                       | 0.413793103 | 855  | 1                                                   | 0.047619048 | 1   | 20                                                  | 0.689655172 | 848 | 3                                                   | 0.375 | 6   |
| <i>Craticula ambigua</i> (Ehrenberg) D.G. Mann                            | 5                                                        | 0.086206897 | 6    | 4                                                   | 0.19047619  | 5   | 0                                                   | 0           | 0   | 1                                                   | 0.125 | 1   |
| <i>Craticula</i> cf. <i>halophila</i> (Grunow) D.G. Mann                  | 1                                                        | 0.017241379 | 1    | 0                                                   | 0           | 0   | 0                                                   | 0           | 0   | 1                                                   | 0.125 | 1   |
| <i>Craticula cuspidata</i> (Kützing) D.G. Mann                            | 10                                                       | 0.172413793 | 54   | 10                                                  | 0.476190476 | 54  | 0                                                   | 0           | 0   | 0                                                   | 0     | 0   |

|                                                                       | Frequency all years – number of samples with the species |             |     | Frequency (%) |  |  | cumulative number |             |    | Frequency 2015 – number of samples with the species |  |  | Frequency (%) – 2015 |             |     | cumulative number 2015 |  |  | Frequency 2016 – number of samples with the species |       |    | Frequency (%) – 2016 |  |  | cumulative number 2016 |       |    | Frequency 2019 – number of samples with the species |  |  | Frequency (%) – 2019 |  |  | cumulative number 2019 |  |  |
|-----------------------------------------------------------------------|----------------------------------------------------------|-------------|-----|---------------|--|--|-------------------|-------------|----|-----------------------------------------------------|--|--|----------------------|-------------|-----|------------------------|--|--|-----------------------------------------------------|-------|----|----------------------|--|--|------------------------|-------|----|-----------------------------------------------------|--|--|----------------------|--|--|------------------------|--|--|
|                                                                       | n=58                                                     |             |     |               |  |  |                   |             |    | n=21                                                |  |  |                      |             |     |                        |  |  | n=29                                                |       |    |                      |  |  |                        |       |    | n=8                                                 |  |  |                      |  |  |                        |  |  |
| <i>Craticula</i> sp.                                                  | 4                                                        | 0.068965517 | 4   |               |  |  | 0                 | 0           | 0  |                                                     |  |  | 4                    | 0.137931034 | 4   |                        |  |  | 0                                                   | 0     | 0  |                      |  |  | 3                      | 0.375 | 3  |                                                     |  |  |                      |  |  |                        |  |  |
| <i>Craticula subminuscula</i> (Manguin) Wetzel & Ector                | 18                                                       | 0.310344828 | 231 |               |  |  | 0                 | 0           | 0  |                                                     |  |  | 15                   | 0.517241379 | 228 |                        |  |  | 3                                                   | 0.375 | 3  |                      |  |  | 3                      | 0.375 | 3  |                                                     |  |  |                      |  |  |                        |  |  |
| <i>Cyclostephanos dubius</i> (Hustedt) Round                          | 28                                                       | 0.482758621 | 61  |               |  |  | 16                | 0.761904762 | 32 |                                                     |  |  | 12                   | 0.413793103 | 29  |                        |  |  | 0                                                   | 0     | 0  |                      |  |  | 0                      | 0     | 0  |                                                     |  |  |                      |  |  |                        |  |  |
| <i>Cyclotella atomus</i> Hustedt                                      | 7                                                        | 0.120689655 | 20  |               |  |  | 0                 | 0           | 0  |                                                     |  |  | 3                    | 0.103448276 | 13  |                        |  |  | 4                                                   | 0.5   | 7  |                      |  |  | 4                      | 0.5   | 7  |                                                     |  |  |                      |  |  |                        |  |  |
| <i>Cyclotella meneghiniana</i> Kützing                                | 30                                                       | 0.517241379 | 189 |               |  |  | 12                | 0.571428571 | 31 |                                                     |  |  | 17                   | 0.586206897 | 157 |                        |  |  | 1                                                   | 0.125 | 1  |                      |  |  | 1                      | 0.125 | 1  |                                                     |  |  |                      |  |  |                        |  |  |
| <i>Cymatopleura solea</i> (Brébisson) W. Smith                        | 6                                                        | 0.103448276 | 6   |               |  |  | 3                 | 0.142857143 | 3  |                                                     |  |  | 1                    | 0.034482759 | 1   |                        |  |  | 2                                                   | 0.25  | 2  |                      |  |  | 2                      | 0.25  | 2  |                                                     |  |  |                      |  |  |                        |  |  |
| <i>Cymbella</i> cf. <i>subcistula</i> Krammer                         | 1                                                        | 0.017241379 | 1   |               |  |  | 1                 | 0.047619048 | 1  |                                                     |  |  | 0                    | 0           | 0   |                        |  |  | 0                                                   | 0     | 0  |                      |  |  | 0                      | 0     | 0  |                                                     |  |  |                      |  |  |                        |  |  |
| <i>Cymbella neocistula</i> Krammer                                    | 1                                                        | 0.017241379 | 1   |               |  |  | 1                 | 0.047619048 | 1  |                                                     |  |  | 0                    | 0           | 0   |                        |  |  | 0                                                   | 0     | 0  |                      |  |  | 0                      | 0     | 0  |                                                     |  |  |                      |  |  |                        |  |  |
| <i>Cymbella</i> sp.                                                   | 1                                                        | 0.017241379 | 1   |               |  |  | 0                 | 0           | 0  |                                                     |  |  | 1                    | 0.034482759 | 1   |                        |  |  | 0                                                   | 0     | 0  |                      |  |  | 0                      | 0     | 0  |                                                     |  |  |                      |  |  |                        |  |  |
| <i>Discostella pseudosteliger</i> (Hustedt) Houk & Klee               | 1                                                        | 0.017241379 | 1   |               |  |  | 0                 | 0           | 0  |                                                     |  |  | 1                    | 0.034482759 | 1   |                        |  |  | 0                                                   | 0     | 0  |                      |  |  | 0                      | 0     | 0  |                                                     |  |  |                      |  |  |                        |  |  |
| <i>Encyonema auerswaldii</i> Rabenhorst                               | 13                                                       | 0.224137931 | 74  |               |  |  | 8                 | 0.380952381 | 62 |                                                     |  |  | 3                    | 0.103448276 | 10  |                        |  |  | 2                                                   | 0.25  | 2  |                      |  |  | 2                      | 0.25  | 2  |                                                     |  |  |                      |  |  |                        |  |  |
| <i>Encyonema minutum</i> agg.                                         | 41                                                       | 0.706896552 | 277 |               |  |  | 13                | 0.619047619 | 19 |                                                     |  |  | 20                   | 0.689655172 | 215 |                        |  |  | 8                                                   | 1     | 43 |                      |  |  | 8                      | 1     | 43 |                                                     |  |  |                      |  |  |                        |  |  |
| <i>Epithemia</i> sp.                                                  | 1                                                        | 0.017241379 | 1   |               |  |  | 0                 | 0           | 0  |                                                     |  |  | 1                    | 0.034482759 | 1   |                        |  |  | 0                                                   | 0     | 0  |                      |  |  | 0                      | 0     | 0  |                                                     |  |  |                      |  |  |                        |  |  |
| <i>Eunotia bidens</i> Ehrenberg                                       | 1                                                        | 0.017241379 | 1   |               |  |  | 0                 | 0           | 0  |                                                     |  |  | 1                    | 0.034482759 | 1   |                        |  |  | 0                                                   | 0     | 0  |                      |  |  | 0                      | 0     | 0  |                                                     |  |  |                      |  |  |                        |  |  |
| <i>Eunotia bilunaris</i> (Ehrenberg) Schaarschmidt                    | 10                                                       | 0.172413793 | 333 |               |  |  | 0                 | 0           | 0  |                                                     |  |  | 10                   | 0.344827586 | 333 |                        |  |  | 0                                                   | 0     | 0  |                      |  |  | 0                      | 0     | 0  |                                                     |  |  |                      |  |  |                        |  |  |
| <i>Eunotia</i> sp.                                                    | 1                                                        | 0.017241379 | 4   |               |  |  | 0                 | 0           | 0  |                                                     |  |  | 1                    | 0.034482759 | 4   |                        |  |  | 0                                                   | 0     | 0  |                      |  |  | 0                      | 0     | 0  |                                                     |  |  |                      |  |  |                        |  |  |
| <i>Fallacia pygmaea</i> (Kützing) A.J.Stickle & D.G.Mann              | 11                                                       | 0.189655172 | 20  |               |  |  | 10                | 0.476190476 | 19 |                                                     |  |  | 1                    | 0.034482759 | 1   |                        |  |  | 0                                                   | 0     | 0  |                      |  |  | 0                      | 0     | 0  |                                                     |  |  |                      |  |  |                        |  |  |
| <i>Fistulifera saprophila</i> (Lange-Bertalot & Bonik) Lange-Bertalot | 32                                                       | 0.551724138 | 247 |               |  |  | 8                 | 0.380952381 | 31 |                                                     |  |  | 19                   | 0.655172414 | 204 |                        |  |  | 5                                                   | 0.625 | 12 |                      |  |  | 5                      | 0.625 | 12 |                                                     |  |  |                      |  |  |                        |  |  |
| <i>Fragilaria capucina</i> Desmazières                                | 30                                                       | 0.517241379 | 82  |               |  |  | 9                 | 0.428571429 | 19 |                                                     |  |  | 15                   | 0.517241379 | 48  |                        |  |  | 6                                                   | 0.75  | 15 |                      |  |  | 6                      | 0.75  | 15 |                                                     |  |  |                      |  |  |                        |  |  |
| <i>Fragilaria gracilis</i> Østrup                                     | 2                                                        | 0.034482759 | 3   |               |  |  | 0                 | 0           | 0  |                                                     |  |  | 2                    | 0.068965517 | 3   |                        |  |  | 0                                                   | 0     | 0  |                      |  |  | 0                      | 0     | 0  |                                                     |  |  |                      |  |  |                        |  |  |
| <i>Fragilaria perdolicatissima</i> Lange-Bertalot & Van de Vijver     | 2                                                        | 0.034482759 | 2   |               |  |  | 0                 | 0           | 0  |                                                     |  |  | 1                    | 0.034482759 | 1   |                        |  |  | 1                                                   | 0.125 | 1  |                      |  |  | 1                      | 0.125 | 1  |                                                     |  |  |                      |  |  |                        |  |  |
| <i>Fragilaria radians</i> (Kützing) D.M. Williams & Round             | 1                                                        | 0.017241379 | 1   |               |  |  | 0                 | 0           | 0  |                                                     |  |  | 0                    | 0           | 0   |                        |  |  | 1                                                   | 0.125 | 1  |                      |  |  | 1                      | 0.125 | 1  |                                                     |  |  |                      |  |  |                        |  |  |

|                                                               | Frequency all years – number of samples with the species |                    |                   | Frequency 2015 – number of samples with the species |                      |                        | Frequency 2016 – number of samples with the species |                      |                        | Frequency 2019 – number of samples with the species |                      |                        |
|---------------------------------------------------------------|----------------------------------------------------------|--------------------|-------------------|-----------------------------------------------------|----------------------|------------------------|-----------------------------------------------------|----------------------|------------------------|-----------------------------------------------------|----------------------|------------------------|
|                                                               | n=58                                                     | Frequency (%)      | cumulative number | n=21                                                | Frequency (%) – 2015 | cumulative number 2015 | n=29                                                | Frequency (%) – 2016 | cumulative number 2016 | n=8                                                 | Frequency (%) – 2019 | cumulative number 2019 |
| <i>Fragilaria recapitellata</i> Lange-Bertalot & Metzeltin    | 10                                                       | 0.172413793        | 15                | 9                                                   | <b>0.428571429</b>   | 14                     | 1                                                   | 0.034482759          | 1                      | 0                                                   | 0                    | 0                      |
| <i>Fragilaria rumpens</i> (Kützing) Carlson                   | 3                                                        | 0.051724138        | 4                 | 0                                                   | 0                    | 0                      | 3                                                   | 0.103448276          | 4                      | 0                                                   | 0                    | 0                      |
| <i>Fragilaria saxoplanctonica</i> Lange-Bertalot & Ulrich     | 6                                                        | 0.103448276        | 8                 | 0                                                   | 0                    | 0                      | 4                                                   | 0.137931034          | 4                      | 2                                                   | 0.25                 | 4                      |
| <i>Fragilaria tenera</i> (W.Smith) Lange-Bertalot             | 7                                                        | 0.120689655        | 26                | 3                                                   | 0.142857143          | 13                     | 3                                                   | 0.103448276          | 11                     | 1                                                   | 0.125                | 2                      |
| <i>Fragilaria vaucheriae</i> (Kützing) Petersen               | 32                                                       | <b>0.551724138</b> | 109               | 8                                                   | <b>0.380952381</b>   | 17                     | 17                                                  | <b>0.586206897</b>   | 65                     | 7                                                   | <b>0.875</b>         | 27                     |
| <i>Fragilariforma virescens</i> (Ralfs) D.M. Williams & Round | 1                                                        | 0.017241379        | 1                 | 0                                                   | 0                    | 0                      | 1                                                   | 0.034482759          | 1                      | 0                                                   | 0                    | 0                      |
| <i>Frustulia vulgaris</i> (Thwaites) De Toni                  | 1                                                        | 0.017241379        | 1                 | 1                                                   | 0.047619048          | 1                      | 0                                                   | 0                    | 0                      | 0                                                   | 0                    | 0                      |
| <i>Geisleria cummerowi</i> (L. Kalbe) Lange-Bertalot          | 1                                                        | 0.017241379        | 1                 | 0                                                   | 0                    | 0                      | 1                                                   | 0.034482759          | 1                      | 0                                                   | 0                    | 0                      |
| <i>Geisleria</i> sp.                                          | 1                                                        | 0.017241379        | 1                 | 0                                                   | 0                    | 0                      | 1                                                   | 0.034482759          | 1                      | 0                                                   | 0                    | 0                      |
| <i>Gomphonema clavatum</i> Reichardt                          | 1                                                        | 0.017241379        | 1                 | 1                                                   | 0.047619048          | 1                      | 0                                                   | 0                    | 0                      | 0                                                   | 0                    | 0                      |
| <i>Gomphonema graciledictum</i> Reichardt                     | 9                                                        | 0.155172414        | 22                | 5                                                   | <b>0.238095238</b>   | 13                     | 3                                                   | 0.103448276          | 8                      | 1                                                   | 0.125                | 1                      |
| <i>Gomphonema innocens</i> Reichardt                          | 2                                                        | 0.034482759        | 2                 | 2                                                   | 0.095238095          | 2                      | 0                                                   | 0                    | 0                      | 0                                                   | 0                    | 0                      |
| <i>Gomphonema italicum</i> Kützing                            | 3                                                        | 0.051724138        | 3                 | 0                                                   | 0                    | 0                      | 3                                                   | 0.103448276          | 3                      | 0                                                   | 0                    | 0                      |
| <i>Gomphonema minutum</i> (C. Agardh) C. Agardh               | 3                                                        | 0.051724138        | 4                 | 0                                                   | 0                    | 0                      | 1                                                   | 0.034482759          | 1                      | 2                                                   | <b>0.25</b>          | 3                      |
| <i>Gomphonema pala</i> Reichardt                              | 1                                                        | 0.017241379        | 1                 | 0                                                   | 0                    | 0                      | 1                                                   | 0.034482759          | 1                      | 0                                                   | 0                    | 0                      |
| <i>Gomphonema parvulum</i> agg.                               | 51                                                       | <b>0.879310345</b> | <b>1964</b>       | 17                                                  | <b>0.80952381</b>    | <b>252</b>             | 26                                                  | <b>0.896551724</b>   | <b>713</b>             | 8                                                   | <b>1</b>             | <b>999</b>             |
| <i>Gomphonema pseudaugur</i> Lange-Bertalot                   | 0                                                        | 0                  | 0                 | 0                                                   | 0                    | 0                      | 0                                                   | 0                    | 0                      | 0                                                   | 0                    | 0                      |
| <i>Gomphonema pumilum</i> (Grunow) Reichardt & Lange-Bertalot | 3                                                        | 0.051724138        | 25                | 0                                                   | 0                    | 0                      | 3                                                   | 0.103448276          | 25                     | 0                                                   | 0                    | 0                      |
| <i>Gomphonema sarcophagus</i> Gregory                         | 1                                                        | 0.017241379        | 1                 | 0                                                   | 0                    | 0                      | 1                                                   | 0.034482759          | 1                      | 0                                                   | 0                    | 0                      |
| <i>Gomphonema subclavatum</i> (Grunow) Grunow                 | 13                                                       | <b>0.224137931</b> | 38                | 1                                                   | 0.047619048          | 1                      | 9                                                   | <b>0.310344828</b>   | 33                     | 3                                                   | <b>0.375</b>         | 4                      |
| <i>Gyrosigma acuminatum</i> (Kützing) Rabenhorst              | 2                                                        | 0.034482759        | 2                 | 2                                                   | 0.095238095          | 2                      | 0                                                   | 0                    | 0                      | 0                                                   | 0                    | 0                      |
| <i>Gyrosigma kuetzingii</i> (Grunow) Cleve                    | 11                                                       | 0.189655172        | 18                | 11                                                  | <b>0.523809524</b>   | 18                     | 0                                                   | 0                    | 0                      | 0                                                   | 0                    | 0                      |

|                                                                              | Frequency all years – number of samples with the species |               |                   | Frequency 2015 – number of samples with the species |                      |                        | Frequency 2016 – number of samples with the species |                      |                        | Frequency 2019 – number of samples with the species |                      |                        |
|------------------------------------------------------------------------------|----------------------------------------------------------|---------------|-------------------|-----------------------------------------------------|----------------------|------------------------|-----------------------------------------------------|----------------------|------------------------|-----------------------------------------------------|----------------------|------------------------|
|                                                                              | n=58                                                     | Frequency (%) | cumulative number | n=21                                                | Frequency (%) – 2015 | cumulative number 2015 | n=29                                                | Frequency (%) – 2016 | cumulative number 2016 | n=8                                                 | Frequency (%) – 2019 | cumulative number 2019 |
| <i>Halamphora veneta</i> (Kützing) Levkov                                    | 2                                                        | 0.034482759   | 10                | 0                                                   | 0                    | 0                      | 0                                                   | 0                    | 0                      | 2                                                   | 0.25                 | 10                     |
| <i>Hantzschia abundans</i> Lange-Bertalot                                    | 13                                                       | 0.224137931   | 146               | 1                                                   | 0.047619048          | 1                      | 12                                                  | 0.413793103          | 145                    | 0                                                   | 0                    | 0                      |
| <i>Hippodonta capitata</i> (Ehrenberg) Lange-Bertalot. Metzeltin & Witkovski | 29                                                       | 0.5           | 81                | 16                                                  | 0.761904762          | 56                     | 8                                                   | 0.275862069          | 15                     | 5                                                   | 0.625                | 10                     |
| <i>Lemnicola hungarica</i> (Grunow) Round & Basson                           | 8                                                        | 0.137931034   | 705               | 0                                                   | 0                    | 0                      | 8                                                   | 0.275862069          | 705                    | 0                                                   | 0                    | 0                      |
| <i>Luticola</i> cf. <i>saprophila</i> Levkov. Metzeltin & Pavlov             | 0                                                        | 0             | 0                 | 0                                                   | 0                    | 0                      | 0                                                   | 0                    | 0                      | 0                                                   | 0                    | 0                      |
| <i>Luticola</i> cf. <i>ventricosa</i> (Kützing) D.G. Mann                    | 1                                                        | 0.017241379   | 1                 | 0                                                   | 0                    | 0                      | 1                                                   | 0.034482759          | 1                      | 0                                                   | 0                    | 0                      |
| <i>Luticola</i> sp.                                                          | 1                                                        | 0.017241379   | 2                 | 0                                                   | 0                    | 0                      | 1                                                   | 0.034482759          | 2                      | 0                                                   | 0                    | 0                      |
| <i>Melosira varians</i> C. Agardh                                            | 1                                                        | 0.017241379   | 1                 | 1                                                   | 0.047619048          | 1                      | 0                                                   | 0                    | 0                      | 0                                                   | 0                    | 0                      |
| <i>Meridion circulare</i> agg.                                               | 6                                                        | 0.103448276   | 7                 | 0                                                   | 0                    | 0                      | 5                                                   | 0.172413793          | 6                      | 1                                                   | 0.125                | 1                      |
| <i>Navicula antonii</i> Lange-Bertalot                                       | 6                                                        | 0.103448276   | 8                 | 4                                                   | 0.19047619           | 4                      | 2                                                   | 0.068965517          | 4                      | 0                                                   | 0                    | 0                      |
| <i>Navicula capitatoradiata</i> Germain                                      | 49                                                       | 0.844827586   | 2162              | 21                                                  | 1                    | 1538                   | 20                                                  | 0.689655172          | 151                    | 8                                                   | 1                    | 473                    |
| <i>Navicula</i> cf. <i>upsaliensis</i> (Grunow) Peragallo                    | 1                                                        | 0.017241379   | 1                 | 0                                                   | 0                    | 0                      | 1                                                   | 0.034482759          | 1                      | 0                                                   | 0                    | 0                      |
| <i>Navicula cryptocephala</i> Kützing                                        | 45                                                       | 0.775862069   | 345               | 18                                                  | 0.857142857          | 234                    | 19                                                  | 0.655172414          | 52                     | 8                                                   | 1                    | 59                     |
| <i>Navicula cryptotenella</i> Lange-Bertalot                                 | 9                                                        | 0.155172414   | 15                | 3                                                   | 0.142857143          | 4                      | 4                                                   | 0.137931034          | 9                      | 2                                                   | 0.25                 | 2                      |
| <i>Navicula cryptotenelloides</i> Lange-Bertalot                             | 1                                                        | 0.017241379   | 1                 | 0                                                   | 0                    | 0                      | 1                                                   | 0.034482759          | 1                      | 0                                                   | 0                    | 0                      |
| <i>Navicula erifuga</i> Lange-Bertalot                                       | 11                                                       | 0.189655172   | 84                | 11                                                  | 0.523809524          | 84                     | 0                                                   | 0                    | 0                      | 0                                                   | 0                    | 0                      |
| <i>Navicula gregaria</i> Donkin                                              | 17                                                       | 0.293103448   | 75                | 16                                                  | 0.761904762          | 74                     | 1                                                   | 0.034482759          | 1                      | 0                                                   | 0                    | 0                      |
| <i>Navicula ingrata</i> Krasske                                              | 3                                                        | 0.051724138   | 3                 | 3                                                   | 0.142857143          | 3                      | 0                                                   | 0                    | 0                      | 0                                                   | 0                    | 0                      |
| <i>Navicula lacuum</i> Lange-Bertalot. G. Hofmann. Werum & Van de Viver      | 23                                                       | 0.396551724   | 69                | 14                                                  | 0.666666667          | 48                     | 1                                                   | 0.034482759          | 1                      | 8                                                   | 1                    | 20                     |
| <i>Navicula lanceolata</i> (C. Agardh) Ehrenberg                             | 1                                                        | 0.017241379   | 2                 | 0                                                   | 0                    | 0                      | 1                                                   | 0.034482759          | 2                      | 0                                                   | 0                    | 0                      |
| <i>Navicula menisculus</i> Schumann                                          | 7                                                        | 0.120689655   | 11                | 6                                                   | 0.285714286          | 10                     | 0                                                   | 0                    | 0                      | 1                                                   | 0.125                | 1                      |
| <i>Navicula meniscus</i> Schumann                                            | 1                                                        | 0.017241379   | 2                 | 1                                                   | 0.047619048          | 2                      | 0                                                   | 0                    | 0                      | 0                                                   | 0                    | 0                      |

|                                                   | Frequency all years – number of samples with the species |               |                   | Frequency 2015 – number of samples with the species |                      |                        | Frequency 2016 – number of samples with the species |                      |                        | Frequency 2019 – number of samples with the species |                      |                        |
|---------------------------------------------------|----------------------------------------------------------|---------------|-------------------|-----------------------------------------------------|----------------------|------------------------|-----------------------------------------------------|----------------------|------------------------|-----------------------------------------------------|----------------------|------------------------|
|                                                   |                                                          | Frequency (%) | cumulative number |                                                     | Frequency (%) – 2015 | cumulative number 2015 |                                                     | Frequency (%) – 2016 | cumulative number 2016 |                                                     | Frequency (%) – 2019 | cumulative number 2019 |
|                                                   | n=58                                                     |               |                   | n=21                                                |                      |                        | n=29                                                |                      |                        | n=8                                                 |                      |                        |
| <i>Navicula reichardtiana</i> Lange-Bertalot      | 49                                                       | 0.844827586   | 831               | 18                                                  | 0.857142857          | 88                     | 23                                                  | 0.793103448          | 712                    | 8                                                   | 1                    | 31                     |
| <i>Navicula simulata</i> Manguin                  | 1                                                        | 0.017241379   | 17                | 1                                                   | 0.047619048          | 17                     | 0                                                   | 0                    | 0                      | 0                                                   | 0                    | 0                      |
| <i>Navicula slesvicensis</i> Grunow               | 8                                                        | 0.137931034   | 11                | 5                                                   | 0.238095238          | 6                      | 3                                                   | 0.103448276          | 5                      | 0                                                   | 0                    | 0                      |
| <i>Navicula tenelloides</i> Hustedt               | 3                                                        | 0.051724138   | 4                 | 0                                                   | 0                    | 0                      | 3                                                   | 0.103448276          | 4                      | 0                                                   | 0                    | 0                      |
| <i>Navicula tripunctata</i> (O.F. Müller) Bory    | 1                                                        | 0.017241379   | 5                 | 0                                                   | 0                    | 0                      | 1                                                   | 0.034482759          | 5                      | 0                                                   | 0                    | 0                      |
| <i>Navicula trivialis</i> Lange-Bertalot          | 26                                                       | 0.448275862   | 191               | 16                                                  | 0.761904762          | 165                    | 4                                                   | 0.137931034          | 7                      | 6                                                   | 0.75                 | 19                     |
| <i>Navicula upsaliensis</i> (Grunow) Peragallo    | 1                                                        | 0.017241379   | 2                 | 1                                                   | 0.047619048          | 2                      | 0                                                   | 0                    | 0                      | 0                                                   | 0                    | 0                      |
| <i>Navicula viridula</i> (Kützing) Ehrenberg      | 1                                                        | 0.017241379   | 3                 | 1                                                   | 0.047619048          | 3                      | 0                                                   | 0                    | 0                      | 0                                                   | 0                    | 0                      |
| <i>Neidium dubium</i> (Ehrenberg) Cleve           | 3                                                        | 0.051724138   | 3                 | 3                                                   | 0.142857143          | 3                      | 0                                                   | 0                    | 0                      | 0                                                   | 0                    | 0                      |
| <i>Neidium</i> sp.                                | 1                                                        | 0.017241379   | 1                 | 0                                                   | 0                    | 0                      | 1                                                   | 0.034482759          | 1                      | 0                                                   | 0                    | 0                      |
| <i>Nitzschia acicularis</i> (Kützing) W. Smith    | 4                                                        | 0.068965517   | 11                | 0                                                   | 0                    | 0                      | 4                                                   | 0.137931034          | 11                     | 0                                                   | 0                    | 0                      |
| <i>Nitzschia amphibia</i> Grunow                  | 27                                                       | 0.465517241   | 124               | 6                                                   | 0.285714286          | 6                      | 15                                                  | 0.517241379          | 81                     | 6                                                   | 0.75                 | 37                     |
| <i>Nitzschia archibaldii</i> Lange-Bertalot       | 47                                                       | 0.810344828   | 2568              | 18                                                  | 0.857142857          | 304                    | 21                                                  | 0.724137931          | 2044                   | 8                                                   | 1                    | 220                    |
| <i>Nitzschia dissipata</i> (Kützing) Grunow       | 25                                                       | 0.431034483   | 61                | 14                                                  | 0.666666667          | 35                     | 8                                                   | 0.275862069          | 20                     | 3                                                   | 0.375                | 6                      |
| <i>Nitzschia filiformis</i> (W. Smith) Van Heurck | 1                                                        | 0.017241379   | 1                 | 0                                                   | 0                    | 0                      | 1                                                   | 0.034482759          | 1                      | 0                                                   | 0                    | 0                      |
| <i>Nitzschia linearis</i> (C. Agardh) W. Smith    | 3                                                        | 0.051724138   | 6                 | 3                                                   | 0.142857143          | 6                      | 0                                                   | 0                    | 0                      | 0                                                   | 0                    | 0                      |
| <i>Nitzschia palea</i> (Kützing) W. Smith         | 56                                                       | 0.965517241   | 2986              | 19                                                  | 0.904761905          | 641                    | 29                                                  | 1                    | 2296                   | 8                                                   | 1                    | 49                     |
| <i>Nitzschia paleacea</i> (Grunow) Grunow         | 4                                                        | 0.068965517   | 19                | 0                                                   | 0                    | 0                      | 4                                                   | 0.137931034          | 19                     | 0                                                   | 0                    | 0                      |
| <i>Nitzschia perminuta</i> (Grunow) M. Peragallo  | 12                                                       | 0.206896552   | 27                | 0                                                   | 0                    | 0                      | 12                                                  | 0.413793103          | 27                     | 0                                                   | 0                    | 0                      |
| <i>Nitzschia pumila</i> Hustedt                   | 4                                                        | 0.068965517   | 6                 | 4                                                   | 0.19047619           | 6                      | 0                                                   | 0                    | 0                      | 0                                                   | 0                    | 0                      |
| <i>Nitzschia recta</i> Hantzsch                   | 8                                                        | 0.137931034   | 13                | 7                                                   | 0.333333333          | 12                     | 1                                                   | 0.034482759          | 1                      | 0                                                   | 0                    | 0                      |
| <i>Nitzschia solgensis</i> Cleve-Euler            | 3                                                        | 0.051724138   | 7                 | 1                                                   | 0.047619048          | 1                      | 1                                                   | 0.034482759          | 1                      | 1                                                   | 0.125                | 5                      |

|                                                      | Frequency all years – number of samples with the species |                    |                   | Frequency 2015 – number of samples with the species |                      |                        | Frequency 2016 – number of samples with the species |                      |                        | Frequency 2019 – number of samples with the species |                      |                        |
|------------------------------------------------------|----------------------------------------------------------|--------------------|-------------------|-----------------------------------------------------|----------------------|------------------------|-----------------------------------------------------|----------------------|------------------------|-----------------------------------------------------|----------------------|------------------------|
|                                                      |                                                          | Frequency (%)      | cumulative number |                                                     | Frequency (%) – 2015 | cumulative number 2015 |                                                     | Frequency (%) – 2016 | cumulative number 2016 |                                                     | Frequency (%) – 2019 | cumulative number 2019 |
|                                                      | n=58                                                     |                    |                   | n=21                                                |                      |                        | n=29                                                |                      |                        | n=8                                                 |                      |                        |
| <i>Nitzschia subacicularis</i> Hustedt               | 7                                                        | 0.120689655        | 32                | 0                                                   | 0                    | 0                      | 7                                                   | <b>0.24137931</b>    | 32                     | 0                                                   | 0                    | 0                      |
| <i>Nitzschia</i> sp.                                 | 1                                                        | 0.017241379        | 1                 | 0                                                   | 0                    | 0                      | 0                                                   | 0                    | 0                      | 1                                                   | 0.125                | 1                      |
| <i>Pinnularia borealis</i> Ehrenberg                 | 5                                                        | 0.086206897        | 12                | 1                                                   | 0.047619048          | 1                      | 4                                                   | 0.137931034          | 11                     | 0                                                   | 0                    | 0                      |
| <i>Pinnularia brebissonii</i> (Kützinger) Rabenhorst | 2                                                        | 0.034482759        | 5                 | 1                                                   | 0.047619048          | 1                      | 0                                                   | 0                    | 0                      | 1                                                   | 0.125                | 4                      |
| <i>Pinnularia dornii</i> Metzeltin                   | 1                                                        | 0.017241379        | 1                 | 0                                                   | 0                    | 0                      | 1                                                   | 0.034482759          | 1                      | 0                                                   | 0                    | 0                      |
| <i>Pinnularia gibba</i> Ehrenberg                    | 1                                                        | 0.017241379        | 1                 | 0                                                   | 0                    | 0                      | 1                                                   | 0.034482759          | 1                      | 0                                                   | 0                    | 0                      |
| <i>Pinnularia grunowii</i> Krammer                   | 4                                                        | 0.068965517        | 12                | 0                                                   | 0                    | 0                      | 4                                                   | 0.137931034          | 12                     | 0                                                   | 0                    | 0                      |
| <i>Pinnularia isselana</i> Krammer                   | 1                                                        | 0.017241379        | 1                 | 0                                                   | 0                    | 0                      | 1                                                   | 0.034482759          | 1                      | 0                                                   | 0                    | 0                      |
| <i>Pinnularia marchia</i> I. Schönfelder ex Krammer  | 6                                                        | 0.103448276        | 86                | 0                                                   | 0                    | 0                      | 6                                                   | <b>0.206896552</b>   | 86                     | 0                                                   | 0                    | 0                      |
| <i>Pinnularia neomajor</i> Krammer                   | 1                                                        | 0.017241379        | 1                 | 0                                                   | 0                    | 0                      | 1                                                   | 0.034482759          | 1                      | 0                                                   | 0                    | 0                      |
| <i>Pinnularia obscura</i> Krasske                    | 5                                                        | 0.086206897        | 24                | 0                                                   | 0                    | 0                      | 5                                                   | 0.172413793          | 24                     | 0                                                   | 0                    | 0                      |
| <i>Pinnularia pseudogibba</i> Krammer                | 2                                                        | 0.034482759        | 13                | 0                                                   | 0                    | 0                      | 2                                                   | 0.068965517          | 13                     | 0                                                   | 0                    | 0                      |
| <i>Pinnularia schoenfelderii</i> Krammer             | 6                                                        | 0.103448276        | 11                | 4                                                   | 0.19047619           | 5                      | 2                                                   | 0.068965517          | 6                      | 0                                                   | 0                    | 0                      |
| <i>Pinnularia sinistra</i> Krammer                   | 7                                                        | 0.120689655        | 32                | 0                                                   | 0                    | 0                      | 7                                                   | <b>0.24137931</b>    | 32                     | 0                                                   | 0                    | 0                      |
| <i>Pinnularia subcapitata</i> Gregory                | 6                                                        | 0.103448276        | 44                | 0                                                   | 0                    | 0                      | 4                                                   | 0.137931034          | 42                     | 2                                                   | 0.25                 | 2                      |
| <i>Pinnularia subgibba</i> Krammer                   | 5                                                        | 0.086206897        | 13                | 0                                                   | 0                    | 0                      | 5                                                   | 0.172413793          | 13                     | 0                                                   | 0                    | 0                      |
| <i>Pinnularia viridiformis</i> Krammer               | 12                                                       | <b>0.206896552</b> | 90                | 3                                                   | 0.142857143          | 3                      | 8                                                   | <b>0.275862069</b>   | 85                     | 1                                                   | 0.125                | 2                      |
| <i>Placoneis anglica</i> (Ralfs) E.J.Cox             | 11                                                       | 0.189655172        | 39                | 9                                                   | <b>0.428571429</b>   | 37                     | 2                                                   | 0.068965517          | 2                      | 0                                                   | 0                    | 0                      |
| <i>Placoneis clementioides</i> (Hustedt) Cox         | 18                                                       | <b>0.310344828</b> | 95                | 16                                                  | <b>0.761904762</b>   | 92                     | 1                                                   | 0.034482759          | 2                      | 1                                                   | 0.125                | 1                      |
| <i>Placoneis clementis</i> (Grunow) Cox              | 2                                                        | 0.034482759        | 2                 | 2                                                   | 0.095238095          | 2                      | 0                                                   | 0                    | 0                      | 0                                                   | 0                    | 0                      |
| <i>Placoneis paraelginensis</i> Lange-Bertalot       | 2                                                        | 0.034482759        | 4                 | 1                                                   | 0.047619048          | 3                      | 1                                                   | 0.034482759          | 1                      | 0                                                   | 0                    | 0                      |
| <i>Placoneis placentula</i> (Ehrenberg) Heinzerling  | 2                                                        | 0.034482759        | 2                 | 0                                                   | 0                    | 0                      | 0                                                   | 0                    | 0                      | 2                                                   | <b>0.25</b>          | 2                      |

|                                                                          | Frequency all years – number of samples with the species |                   |  | Frequency 2015 – number of samples with the species |                        |  | Frequency 2016 – number of samples with the species |                        |  | Frequency 2019 – number of samples with the species |                        |  |
|--------------------------------------------------------------------------|----------------------------------------------------------|-------------------|--|-----------------------------------------------------|------------------------|--|-----------------------------------------------------|------------------------|--|-----------------------------------------------------|------------------------|--|
|                                                                          | Frequency (%)                                            | cumulative number |  | Frequency (%) – 2015                                | cumulative number 2015 |  | Frequency (%) – 2016                                | cumulative number 2016 |  | Frequency (%) – 2019                                | cumulative number 2019 |  |
|                                                                          | n=58                                                     |                   |  | n=21                                                |                        |  | n=29                                                |                        |  | n=8                                                 |                        |  |
| <i>Placoneis pseudanglica</i> (Lange-Bertalot) Cox                       | 2 0.034482759                                            | 3                 |  | 0 0 0                                               |                        |  | 1 0.034482759                                       | 1                      |  | 1 0.125                                             | 2                      |  |
| <i>Placoneis</i> sp.                                                     | 1 0.017241379                                            | 1                 |  | 0 0 0                                               |                        |  | 1 0.034482759                                       | 1                      |  | 0 0 0                                               |                        |  |
| <i>Planothidium</i> cf. <i>daui</i> (Foged) Lange-Bertalot               | 2 0.034482759                                            | 2                 |  | 2 0.095238095                                       | 2                      |  | 0 0 0                                               |                        |  | 0 0 0                                               |                        |  |
| <i>Planothidium delicatulum</i> (Kützing) Round & Bukhtiyarova           | 1 0.017241379                                            | 1                 |  | 0 0 0                                               |                        |  | 1 0.034482759                                       | 1                      |  | 0 0 0                                               |                        |  |
| <i>Planothidium frequentissimum</i> (Lange-Bertalot) Lange-Bertalot      | 44 0.75862069                                            | 381               |  | 12 0.571428571                                      | 37                     |  | 24 0.827586207                                      | 278                    |  | 8 1 66                                              |                        |  |
| <i>Planothidium lanceolatum</i> (Brébisson ex Kützing) Lange-Bertalot    | 18 0.310344828                                           | 64                |  | 7 0.333333333                                       | 20                     |  | 10 0.344827586                                      | 43                     |  | 1 0.125                                             | 1                      |  |
| <i>Pseudostaurosira brevistriata</i> (Grunow) Williams & Round           | 43 0.74137931                                            | 1161              |  | 21 1 867                                            |                        |  | 15 0.517241379                                      | 90                     |  | 7 0.875                                             | 204                    |  |
| <i>Pseudostaurosira elliptica</i> (Schumann) Edlund. Morales & Spaulding | 43 0.74137931                                            | 2716              |  | 20 0.952380952                                      | 2347                   |  | 16 0.551724138                                      | 114                    |  | 7 0.875                                             | 255                    |  |
| <i>Puncticulata balatonis</i> (Pantocsek) Wojtal & Budzy                 | 54 0.931034483                                           | 465               |  | 21 1 344                                            |                        |  | 25 0.862068966                                      | 89                     |  | 8 1 32                                              |                        |  |
| <i>Rhoicosphenia abbreviata</i> (C. Agardh) Lange-Bertalot               | 1 0.017241379                                            | 1                 |  | 0 0 0                                               |                        |  | 1 0.034482759                                       | 1                      |  | 0 0 0                                               |                        |  |
| <i>Rossethidium petersenii</i> (Hustedt) Round & Bukhtiyarova            | 1 0.017241379                                            | 2                 |  | 0 0 0                                               |                        |  | 1 0.034482759                                       | 2                      |  | 0 0 0                                               |                        |  |
| <i>Sellaphora bacillum</i> (Ehrenberg) D.G.Mann                          | 4 0.068965517                                            | 9                 |  | 4 0.19047619                                        | 9                      |  | 0 0 0                                               |                        |  | 0 0 0                                               |                        |  |
| <i>Sellaphora pupula</i> (Kützing) Mereschkovsky                         | 31 0.534482759                                           | 151               |  | 16 0.761904762                                      | 117                    |  | 7 0.24137931                                        | 9                      |  | 8 1 25                                              |                        |  |
| <i>Stauroneis leguminopsis</i> Lange-Bertalot & Krammer                  | 2 0.034482759                                            | 2                 |  | 1 0.047619048                                       | 1                      |  | 1 0.034482759                                       | 1                      |  | 0 0 0                                               |                        |  |
| <i>Stauroneis</i> sp.                                                    | 2 0.034482759                                            | 9                 |  | 0 0 0                                               |                        |  | 2 0.068965517                                       | 9                      |  | 0 0 0                                               |                        |  |
| <i>Stauroneis subgracilis</i> Lange-Bertalot et Krammer                  | 7 0.120689655                                            | 27                |  | 0 0 0                                               |                        |  | 7 0.24137931                                        | 27                     |  | 0 0 0                                               |                        |  |
| <i>Staurosira binodis</i> (Ehrenberg) Lange-Bertalot                     | 33 0.568965517                                           | 141               |  | 18 0.857142857                                      | 105                    |  | 10 0.344827586                                      | 27                     |  | 5 0.625                                             | 9                      |  |
| <i>Staurosira</i> cf. <i>venter</i> (Ehrenberg) Grunow                   | 2 0.034482759                                            | 2                 |  | 0 0 0                                               |                        |  | 2 0.068965517                                       | 2                      |  | 0 0 0                                               |                        |  |
| <i>Staurosira construens</i> Ehrenberg                                   | 20 0.344827586                                           | 58                |  | 15 0.714285714                                      | 43                     |  | 5 0.172413793                                       | 15                     |  | 0 0 0                                               |                        |  |
| <i>Staurosirella leptostauron</i> var. <i>dubia</i> (Grunow) M.B. Edlund | 45 0.775862069                                           | 1276              |  | 21 1 1052                                           |                        |  | 16 0.551724138                                      | 56                     |  | 8 1 168                                             |                        |  |
| <i>Stephanodiscus hantzschii</i> Grunow                                  | 14 0.24137931                                            | 70                |  | 6 0.285714286                                       | 12                     |  | 5 0.172413793                                       | 52                     |  | 3 0.375                                             | 6                      |  |
| <i>Surirella angusta</i> Kützing                                         | 6 0.103448276                                            | 52                |  | 1 0.047619048                                       | 1                      |  | 3 0.103448276                                       | 49                     |  | 2 0.25                                              | 2                      |  |



|                                                                              | Frequency all years – number of samples with the species |                    |                   | Frequency 2015 – number of samples with the species |                      |                        | Frequency 2016 – number of samples with the species |                      |                        | Frequency 2019 – number of samples with the species |                      |                        |
|------------------------------------------------------------------------------|----------------------------------------------------------|--------------------|-------------------|-----------------------------------------------------|----------------------|------------------------|-----------------------------------------------------|----------------------|------------------------|-----------------------------------------------------|----------------------|------------------------|
|                                                                              | n=58                                                     | Frequency (%)      | cumulative number | n=21                                                | Frequency (%) – 2015 | cumulative number 2015 | n=29                                                | Frequency (%) – 2016 | cumulative number 2016 | n=8                                                 | Frequency (%) – 2019 | cumulative number 2019 |
| <i>Surirella brebissonii</i> Krammer & Lange-Bertalot                        | 5                                                        | 0.086206897        | 7                 | 4                                                   | 0.19047619           | 6                      | 1                                                   | 0.034482759          | 1                      | 0                                                   | 0                    | 0                      |
| <i>Surirella minuta</i> Brébisson                                            | 1                                                        | 0.017241379        | 1                 | 1                                                   | 0.047619048          | 1                      | 0                                                   | 0                    | 0                      | 0                                                   | 0                    | 0                      |
| <i>Tryblionella salinarum</i> (Grunow) Pantocsek                             | 2                                                        | 0.034482759        | 2                 | 1                                                   | 0.047619048          | 1                      | 0                                                   | 0                    | 0                      | 1                                                   | 0.125                | 1                      |
| <i>Ulnaria acus</i> (Kützing) Aboal                                          | 2                                                        | 0.034482759        | 3                 | 0                                                   | 0                    | 0                      | 1                                                   | 0.034482759          | 2                      | 1                                                   | 0.125                | 1                      |
| <i>Ulnaria grunowii</i> (Lange-Bertalot & Ulrich) Cantonati & Lange-Bertalot | 1                                                        | 0.017241379        | 6                 | 0                                                   | 0                    | 0                      | 1                                                   | 0.034482759          | 6                      | 0                                                   | 0                    | 0                      |
| <i>Ulnaria ulna</i> (Nitzsch) P.Compère                                      | 26                                                       | <b>0.448275862</b> | <b>106</b>        | 8                                                   | <b>0.380952381</b>   | 12                     | 16                                                  | <b>0.551724138</b>   | 92                     | 2                                                   | <b>0.25</b>          | 2                      |
