# Supplementary material
Source: MDPI journal article supplement (https://www.mdpi.com/2073-4441/13/11/1569)
Supplement: s1 [file s1]

**Table S2.** Basic physico-chemical parameters of water (growing seasons 2014–2016 and 2019, April–August). Averages (minima / maxima) are presented: (WT) water transparency, (Cond.) conductivity, (TOC) total organic carbon, (DOC) dissolved organic carbon, (TC) total carbon, (TN) total nitrogen, (N-NH<sub>4</sub>) ammonia nitrogen, (N-NO<sub>3</sub>) nitrate nitrogen, (TP) total phosphorus, (SRP) soluble reactive phosphorus, (KNK 4.5) alkalinity, (Chl-a) chlorophyll-a, (Na) – sodium, (Mg) – magnesium, (K) – potassium, (Ca) – calcium, (Fe) – total iron. \* – based on values near detection limit.

|                           |      | BSB                   | DSB                   | FD                    |
|---------------------------|------|-----------------------|-----------------------|-----------------------|
| WT<br>m                   | 2014 | n. a.                 | n. a.                 | 0.58 (0.40 / 1.30)    |
|                           | 2015 | 0.33 (0.18 / 0.55)    | 0.37 (0.25 / 0.55)    | 0.49 (0.40 / 0.80)    |
|                           | 2016 | 0.48 (0.25 / 0.85)    | 0.53 (0.30 / 0.80)    | 0.66 (0.30 / 1.30)    |
|                           | 2019 | n. a.                 | n. a.                 | n. a.                 |
| pH                        | 2014 | n. a.                 | n. a.                 | 8.4 (8.0 / 9.4)       |
|                           | 2015 | n. a.                 | n. a.                 | 8.6 (8.3 / 8.8)       |
|                           | 2016 | n. a.                 | n. a.                 | 9.0 (8.9 / 9.1)       |
|                           | 2019 | n. a.                 | n. a.                 | n. a.                 |
| Cond.<br>μS cm–<br>1      | 2014 | n. a.                 | n. a.                 | 290 (281 / 298)       |
|                           |      | n. a.                 | n. a.                 | 318 (287 / 365)       |
|                           | 2015 |                       |                       |                       |
|                           | 2016 | n. a.                 | n. a.                 | 376 (370 / 382)       |
|                           | 2019 | n. a.                 | n. a.                 | n. a.                 |
| TOC<br>mg/l               | 2014 | 16 (13 / 19)          | 16 (12 / 18)          | 16 (14 / 20)          |
|                           | 2015 | 19 (14 / 22)          | 18 (14 / 22)          | 17 (13 / 21)          |
|                           | 2016 | 24 (21 / 26)          | 24 (20 / 31)          | 23 (19 / 29)          |
|                           | 2019 | n. a.                 | n. a.                 | 26 (16 / 40)          |
| DOC<br>mg/l               | 2014 | n. a.                 | n. a.                 | n. a.                 |
|                           | 2015 | 14 (12 / 16)          | 13 (12 / 15)          | 13 (12 / 15)          |
|                           | 2016 | 18 (15 / 20)          | 18 (15 / 22)          | 18 (16 / 20)          |
|                           | 2019 | n. a.                 | n. a.                 | 17 (13 / 20)          |
| TC<br>mg/l                | 2014 | n. a.                 | n. a.                 | n. a.                 |
|                           | 2015 | 42 (22 / 52)          | 42 (22 / 50)          | 42 (33 / 50)          |
|                           | 2016 | 48 (46 / 50)          | 47 (43 / 52)          | 46 (40 / 51)          |
|                           | 2019 | n. a.                 | n. a.                 | 49 (37 / 67)          |
| TN<br>mg/l                | 2014 | 1.1 (0.7 / 2.2)       | 1.1 (0.7 / 1.6)       | 1.2 (0.6 / 2.6)       |
|                           | 2015 | 1.5 (0.9 / 2.0)       | 1.4 (0.9 / 1.8)       | 1.3 (1.0 / 1.9)       |
|                           | 2016 | 2.7 (1.9 / 3.8)       | 2.5 (1.2 / 3.9)       | 2.4 (1.9 / 3.8)       |
|                           | 2019 | n. a.                 | n. a.                 | 3.6 (1.6 / 5.0)       |
| N-NH <sub>4</sub><br>mg/l | 2014 | 0.12 (0.01 / 0.80)    | 0.05 (0.01 / 0.11)    | 0.05 (0.01 / 0.08)    |
|                           | 2015 | 0.08 (0.01 / 0.20)    | 0.06 (0.01 / 0.16)    | 0.10 (0.01 / 0.26)    |
|                           | 2016 | 0.15 (0.03 / 0.38)    | 0.08 (0.03 / 0.18)    | 0.17 (0.04 / 0.92)    |
|                           | 2019 | n. a.                 | n. a.                 | 0.15 (0.02 / 1.20)    |
| N-NO <sub>3</sub><br>mg/l | 2014 | 0.07 (0.05 / 0.29)    | 0.05 (0.05 / 0.05)*   | 0.05 (0.05 / 0.05)*   |
|                           | 2015 | 0.05 (0.05 / 0.05)*   | 0.05 (0.05 / 0.05)*   | 0.05 (0.05 / 0.05)*   |
|                           | 2016 | 0.24 (0.05 / 1.70)    | 0.06 (0.05 / 0.18)    | 0.07 (0.05 / 0.23)    |
|                           | 2019 | n. a.                 | n. a.                 | 0.26 (0.05 / 1.60)    |
| TP<br>mg/l                | 2014 | 0.140 (0.073 / 0.220) | 0.115 (0.061 / 0.180) | 0.111 (0.048 / 0.150) |
|                           | 2015 | 0.193 (0.110 / 0.260) | 0.181 (0.120 / 0.220) | 0.157 (0.120 / 0.200) |
|                           | 2016 | 0.227 (0.097 / 0.320) | 0.214 (0.100 / 0.360) | 0.217 (0.110 / 0.490) |
|                           | 2019 | n. a.                 | n. a.                 | 0.286 (0.120 / 0.530) |
| SRP<br>mg/l               | 2014 | 0.040 (0.022 / 0.060) | 0.035 (0.019 / 0.054) | 0.034 (0.020 / 0.053) |
|                           | 2015 | 0.047 (0.031 / 0.089) | 0.038 (0.027 / 0.064) | 0.040 (0.026 / 0.063) |
|                           | 2016 | 0.074 (0.022 / 0.130) | 0.069 (0.022 / 0.120) | 0.077 (0.026 / 0.210) |
|                           | 2019 | n. a.                 | n. a.                 | 0.102 (0.017 / 0.270) |

|                   |                              |                                                                         |                                                                         |                                                                                      |
|-------------------|------------------------------|-------------------------------------------------------------------------|-------------------------------------------------------------------------|--------------------------------------------------------------------------------------|
| KNK 4.5<br>mmol/l | 2014<br>2015<br>2016<br>2019 | 2.0 (1.7 / 2.2)<br>2.4 (2.2 / 2.6)<br>2.4 (2.0 / 2.8)<br>n. a.          | 2.0 (1.7 / 2.2)<br>2.3 (2.1 / 2.6)<br>2.4 (2.1 / 2.7)<br>n. a.          | 2.0 (1.7 / 2.2)<br>2.3 (2.1 / 2.6)<br>2.4 (2.1 / 2.8)<br>2.2 (1.6 / 2.7)             |
| Chl-a<br>ug/l     | 2014<br>2015<br>2016<br>2019 | 49 (21 / 97)<br>70 (17 / 100)<br>101 (19 / 180)<br>n. a.                | 49 (9 / 110)<br>84 (23 / 130)<br>126 (26 / 400)<br>n. a.                | 41 (15 / 74)<br>63 (19 / 120)<br>142 (30 / 680)<br>132 (36 / 290)                    |
| Na<br>mg/l        | 2014<br>2015<br>2016<br>2019 | 9.9 (9.3 / 11.0)<br>12.4 (11.0 / 14.0)<br>13.9 (12.0 / 15.0)<br>n. a.   | 9.8 (9.5 / 10.0)<br>12.4 (11.0 / 15.0)<br>14.0 (12.0 / 16.0)<br>n. a.   | 9.7 (9.3 / 10.0)<br>12.4 (11.0 / 15.0)<br>14.1 (13.0 / 16.0)<br>15.4 (14.0 / 16.0)   |
| Mg<br>mg/l        | 2014<br>2015<br>2016<br>2019 | 11 (11 / 12)<br>14 (13 / 16)<br>15 (13 / 17)<br>n. a.                   | 11 (11 / 12)<br>14 (13 / 16)<br>15 (13 / 17)<br>n. a.                   | 11 (11 / 12)<br>13 (12 / 16)<br>15 (13 / 17)<br>14 (13 / 16)                         |
| K<br>mg/l         | 2014<br>2015<br>2016<br>2019 | 6.9 (6.2 / 8.3)<br>7.9 (6.5 / 8.9)<br>8.9 (8.4 / 9.3)<br>n. a.          | 6.9 (6.2 / 7.6)<br>7.8 (6.9 / 8.8)<br>8.8 (8.3 / 9.2)<br>n. a.          | 6.8 (6.2 / 7.7)<br>7.5 (6.6 / 9.0)<br>8.8 (8.3 / 9.5)<br>7.9 (6.6 / 8.9)             |
| Ca<br>mg/l        | 2014<br>2015<br>2016<br>2019 | 29 (27 / 32)<br>33 (28 / 37)<br>33 (30 / 36)<br>n. a.                   | 28 (27 / 30)<br>32 (28 / 35)<br>32 (28 / 36)<br>n. a.                   | 28 (27 / 30)<br>31 (27 / 35)<br>33 (29 / 36)<br>29 (27 / 32)                         |
| Fe<br>mg/l        | 2014<br>2015<br>2016<br>2019 | 0.78 (0.31 / 1.40)<br>1.19 (0.24 / 2.00)<br>0.70 (0.41 / 1.40)<br>n. a. | 0.63 (0.14 / 1.10)<br>1.03 (0.22 / 1.60)<br>0.45 (0.23 / 0.79)<br>n. a. | 0.58 (0.11 / 0.99)<br>0.73 (0.21 / 1.10)<br>0.34 (0.22 / 0.64)<br>0.25 (0.08 / 0.49) |
