# Supplementary material
Source: MDPI journal article supplement (https://www.mdpi.com/2073-4441/13/11/1569)
Supplement: s1 [file s1]

**Drivers of macrophyte and diatom diversity in a shallow hypertrophic lake**

**Kateřina Šumberová\*, Ondřej Vild, Michal Ducháček, Martina Fabšičová, Jan Potužák, and Markéta Fránková**

\* Correspondence: katerina.sumberova@ibot.cas.cz

**Figures S1–S15.** Photographs documenting environment, selected vascular plant species and their assemblages, and fish farming practices in the Dehtář fishpond (Southern Bohemia, Czech Republic).

Dehtář is a fishpond serving mainly for common carp (*Cyprinus carpio*) breeding and, to a lesser extent, also for the breeding of other fish species with similar habitat requirements as the carp (e.g. white amur – *Ctenopharyngodon idella*, spike – *Esox lucius*, spike-perch – *Stizostedion lucioperca*). The fish stock also includes fish species that are not intentionally stocked due to their low economic importance and ability to reproduce naturally in the fishpond system (e.g. roach – *Rutilus rutilus*, perch – *Perca fluviatilis*). In some cases, they even constitute competition for feed with the stocked fish and/or exhibit invasion potential (e.g. bream – *Abramis brama*, Prussian carp – *Carassius gibelio*).

Explanations to photograph captions: For the position of the mapping segments along the fishpond's bank see Figure 1 (Materials and Methods, part 2.1). Vegetation zones: 1<sup>st</sup> zone (first zone in the main text) – upper littoral with permanent reed and tall sedge beds; 2<sup>nd</sup> zone (second zone) – lower exposed littoral with vegetation of ruderal grasslands, temporary reed beds and wetland annual vegetation; 3<sup>rd</sup> zone (third zone) – shallowly flooded lower littoral with vegetation of amphiphytes and (mainly) submerged aquatic plants. For a more detailed description of the vegetation zones see Results, part 3.2.2. If no other author is given, photographs originate from K. Šumberová.

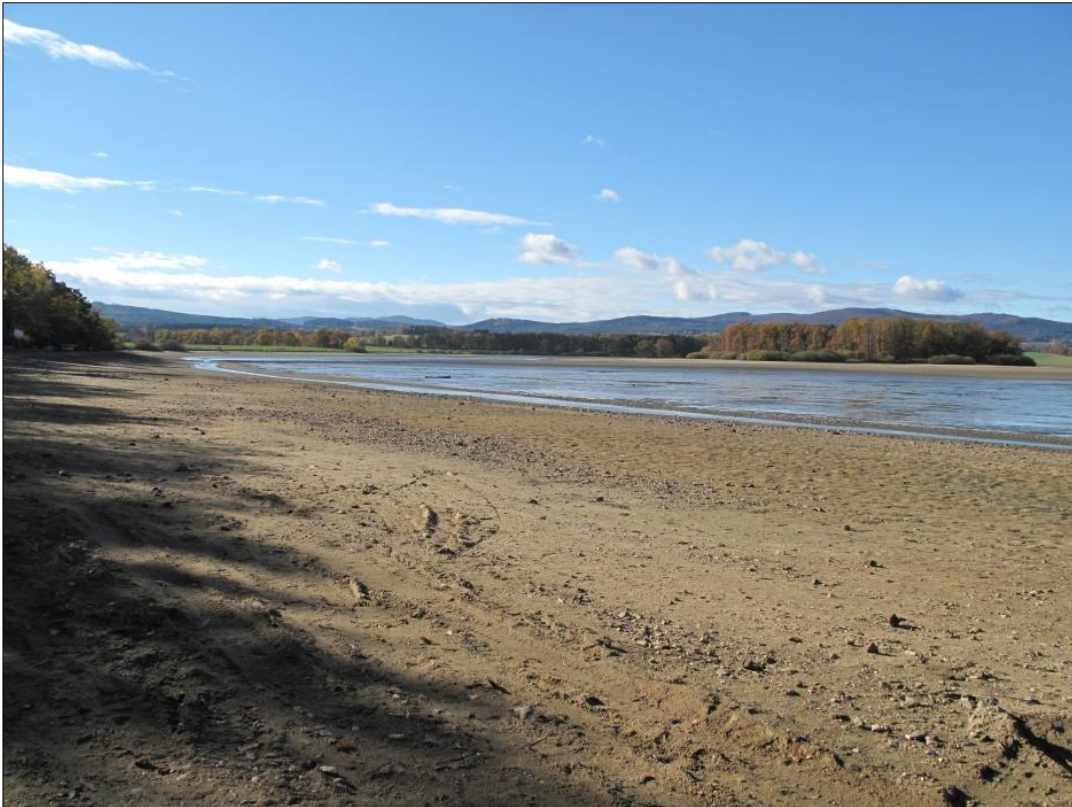

**(a)**

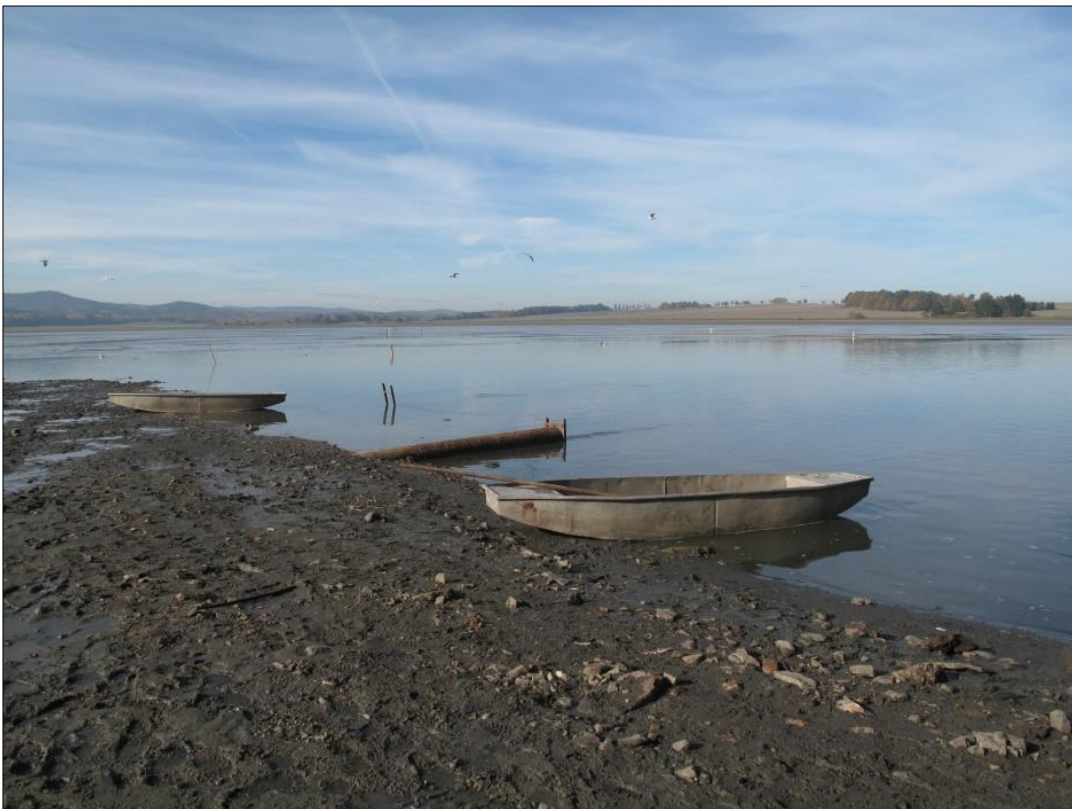

**(b)**

**Figure S1.** The Dehtář fishpond during fish harvesting in November 2016. The water level is substantially lowered already a month before the harvest. Following the harvest, the fishpond is continually filled with water, with the management maximum during the second growing season after the harvest (2<sup>nd</sup> year of the management cycle): **(a)** Exposed sandy shores below the fishpond dam, with the adjacent zone of wet fishpond mud; **(b)** The deepest part of the Dehtář fishpond where the rest of the water with fish concentrates during the harvesting.



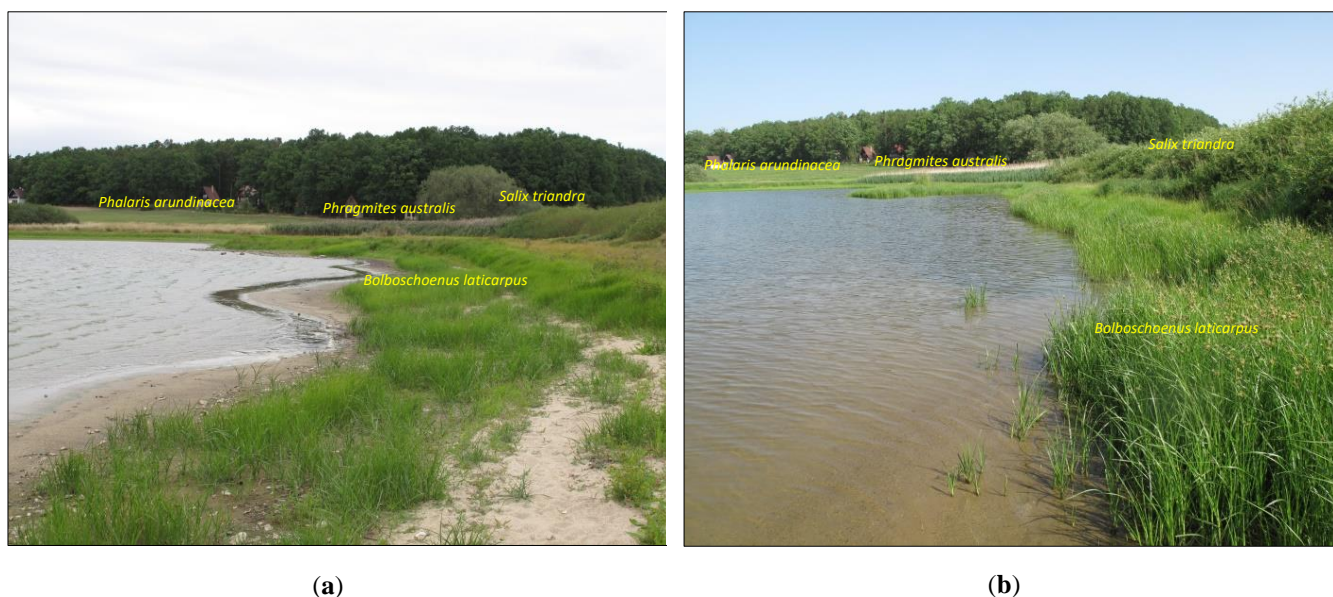

**Figure S2.** NE corner of the Dehtář fishpond. Segment 2 with *Salix triandra* (1<sup>st</sup> vegetation zone) and *Bolboschoenus laticarpus* (2<sup>nd</sup> zone) stands, segment 3 with *Phragmites australis* (1<sup>st</sup> zone) and a part of segment 4 with *Phalaris arundinacea* beds (1<sup>st</sup> zone). Both photos are from the 1<sup>st</sup> year of the management cycle: (a) September of an extremely dry year 2015; (b) June 2019 when the littoral of this fishpond part was shallowly flooded.

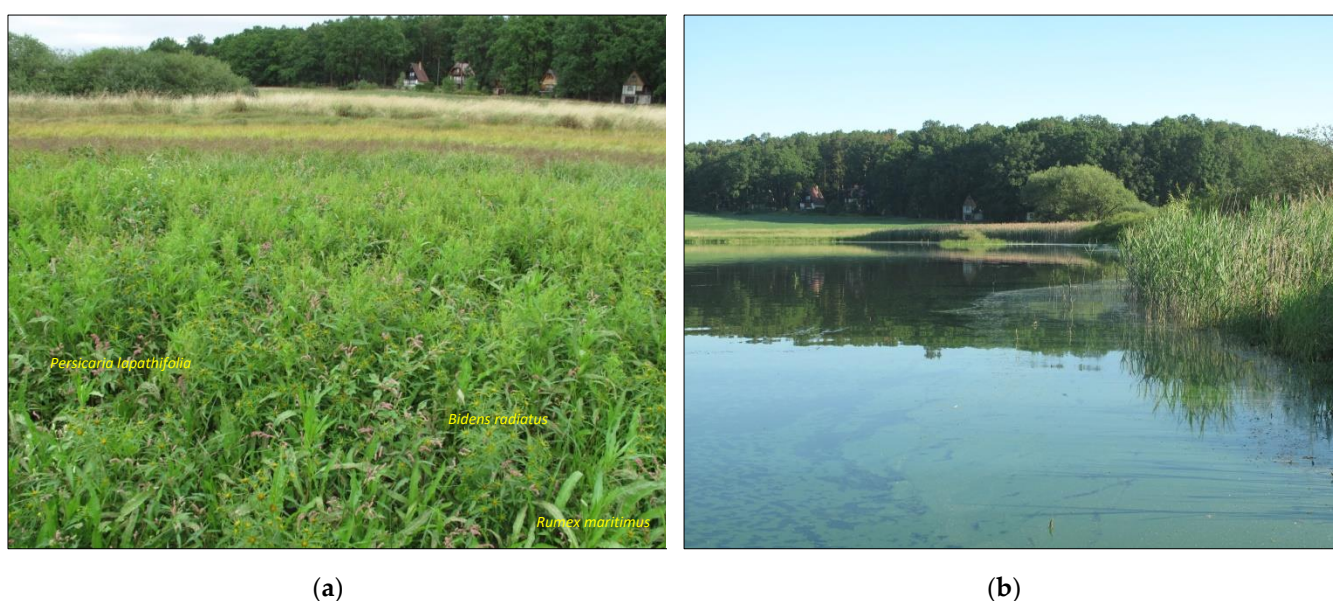

**Figure S3.** NE corner of the Dehtář fishpond, a detail of the narrow bay on the transition of segments 3 and 4: (a) September of an extremely dry year 2015, vegetation predominated by tall wetland annual herbs (*Bidens radiatus*, *Persicaria lapathifolia* and *Rumex maritimus*) on sapropelic mud; (b) June 2016 when the littoral of the bay was deeply flooded (about 30 cm in the 1<sup>st</sup> vegetation zone with *Phragmites australis* and up to 70 cm in the remnants of the 2<sup>nd</sup> zone) and large areas of cyanobacterial mats appeared.



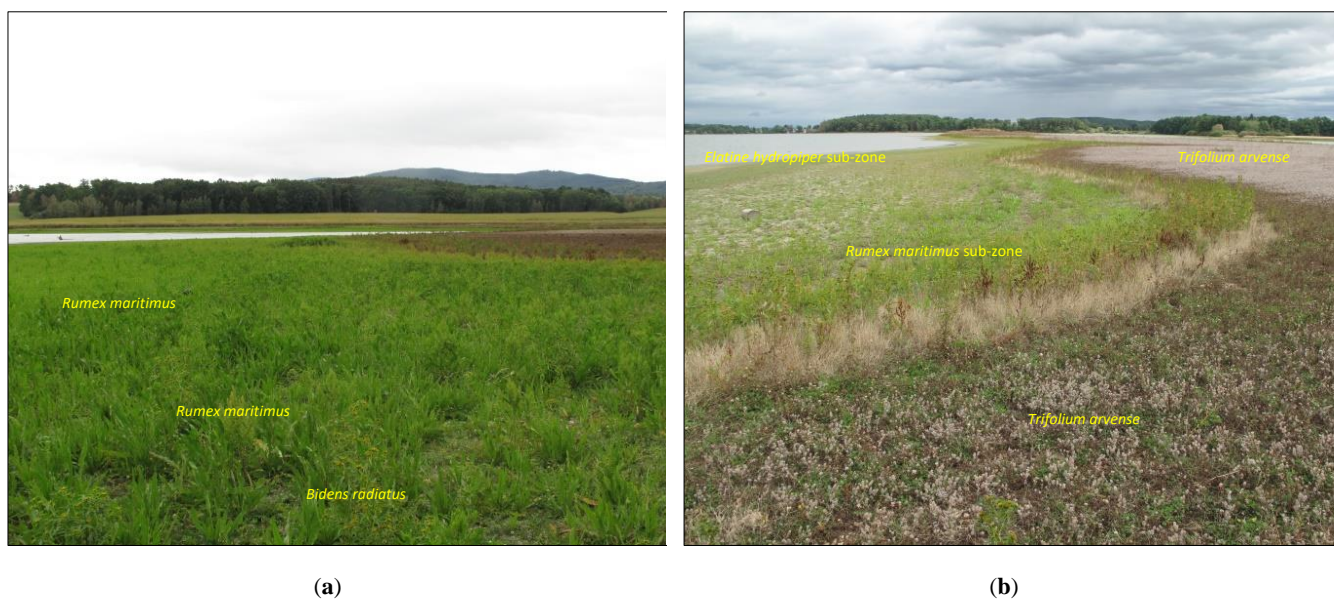

**Figure S4.** Extensive areas of wetland annual vegetation (2<sup>nd</sup> zone) developed in an extremely dry year 2015 on exposed bottom of the Dehtář fishpond: (a) Vegetation on muddy sediments in the Babický Stream Bay (segment 7) predominated by *Rumex maritimus* and *Bidens radiatus*; (b) Exposed sands and gravels with *Trifolium arvense* community, bordered by tall wetland annual vegetation (*Rumex maritimus*, etc.) in places with a shallow muddy layer and by the vegetation transitional between small wetland annual and amphibious plant communities (*Elatine hydropiper*, etc.) at sites with deeper mud along the south-western shores (segment 11; September 2015).

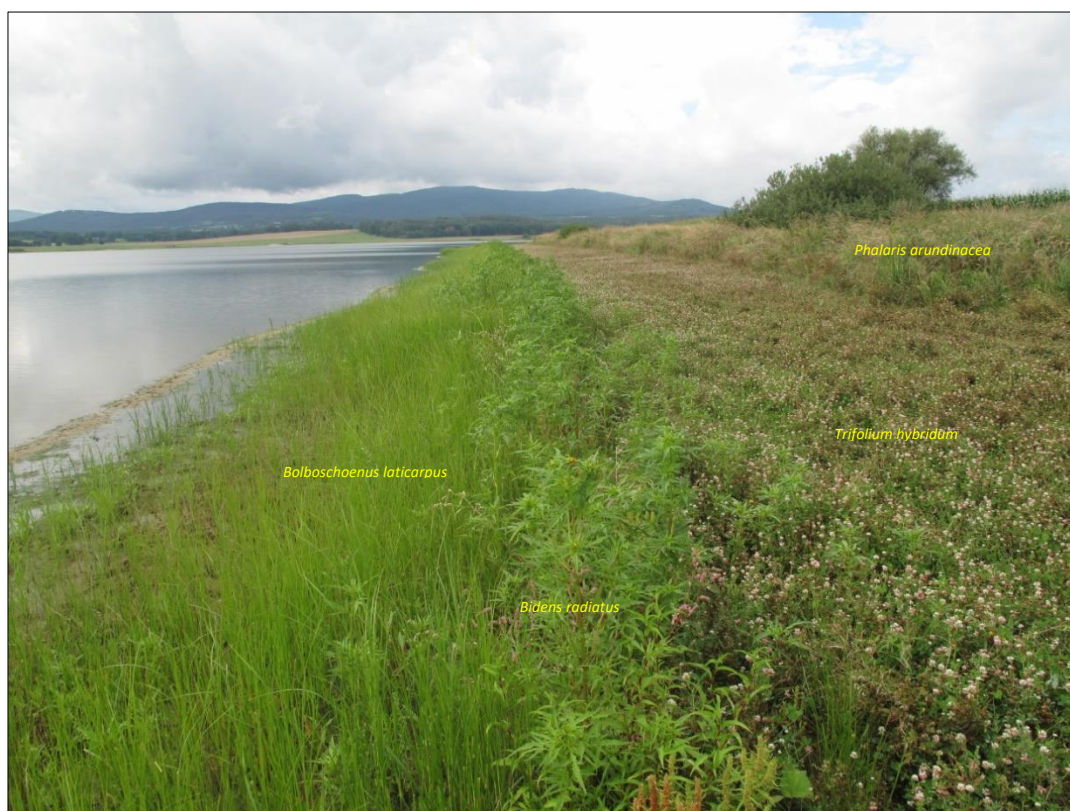

**Figure S5.** Zonation of the littoral in the northern part of the Dehtář fishpond (segment 4). From the bank: 1<sup>st</sup> zone – narrow strip predominated by *Phalaris arundinacea*, 2<sup>nd</sup> zone with several sub-zones, i.e. grassland with *Trifolium hybridum*, narrow strip predominated by annual *Bidens radiatus* and a stand of *Bolboschoenus* sp. Aquatic and amphibious plant assemblages (3<sup>rd</sup> zone) develop on the watered margin of *Bolboschoenus* stand and in shallow lagoons bordered by sandy deposits (August 2019).



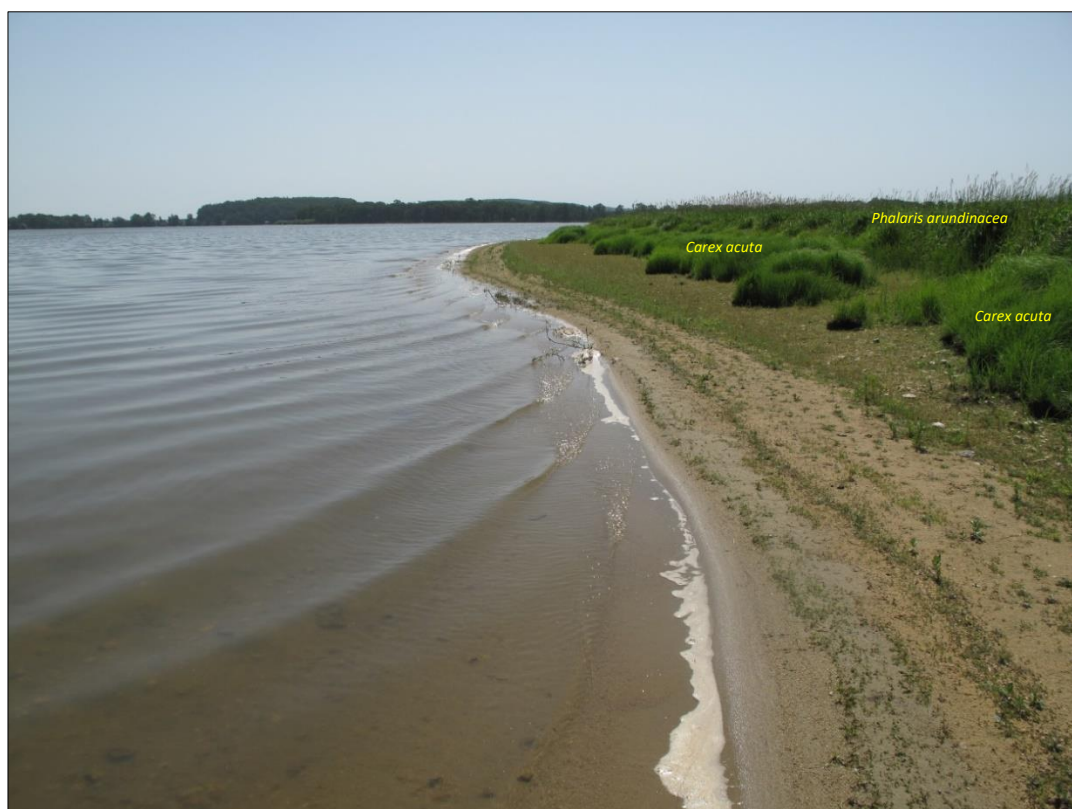

**Figure S6.** Zonation of the littoral in the north-western part of the Dehtář fishpond (segment 6). From the bank: 1<sup>st</sup> zone – narrow strip predominated by *Phalaris arundinacea* and disturbed stands of *Carex acuta*, and 2<sup>nd</sup> zone with scarce vegetation of wetland annuals with low moisture demands. The shallow water zone is not yet vegetated (June 2019).

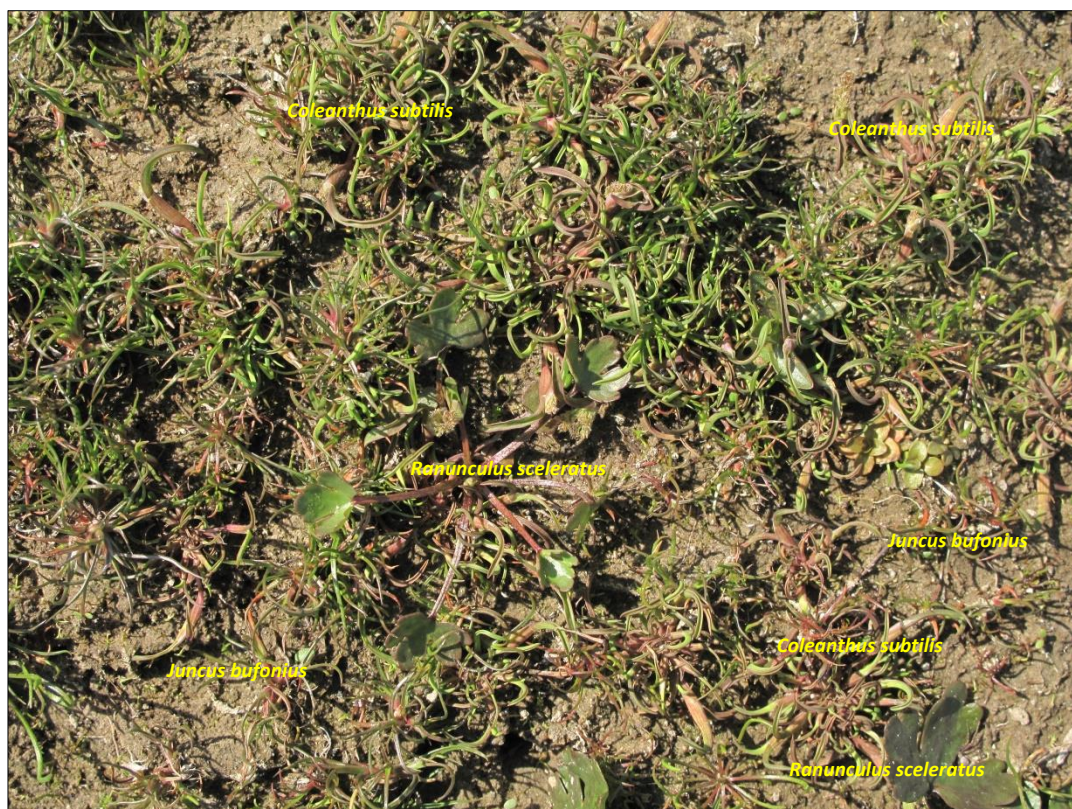

**Figure S7.** Detail of the vegetation in the Babický Stream Bay (segment 7; see also Figure S12): transitional plant assemblages on moist sand with a shallow muddy layer. *Coleanthus subtilis*, *Ranunculus sceleratus* and *Juncus bufonius* are the dominants (April 2015).



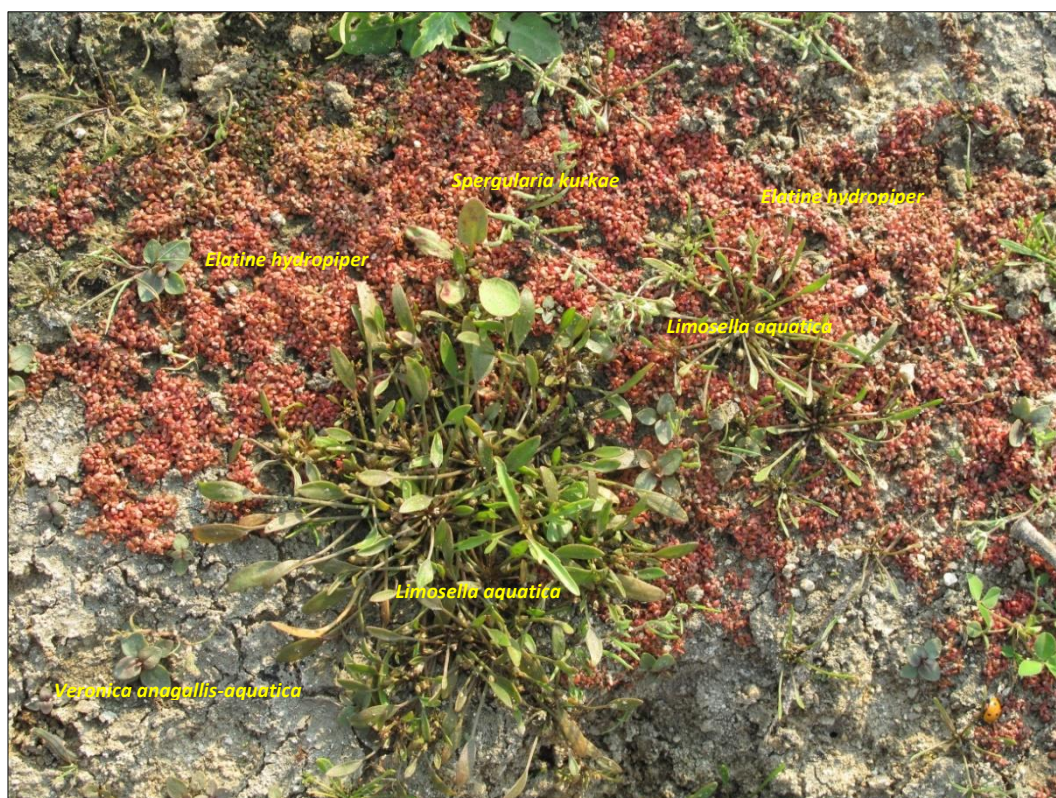

**Figure S8.** Detail of the vegetation on the south-western shore of the Dehtář fishpond (see also Figure S4a): transitional plant assemblages on moist sand with a shallow muddy layer. *Elatine hydropiper* (red-coloured under extremely dry conditions) and *Limosella aquatica* are the dominants, seedlings of *Veronica anagallis-aquatica* and *Spergularia kurkae* also occur frequently. These stands appeared at the end of the growing season in 2015 on newly exposed substrates, following continual water table decrease (April 2015).

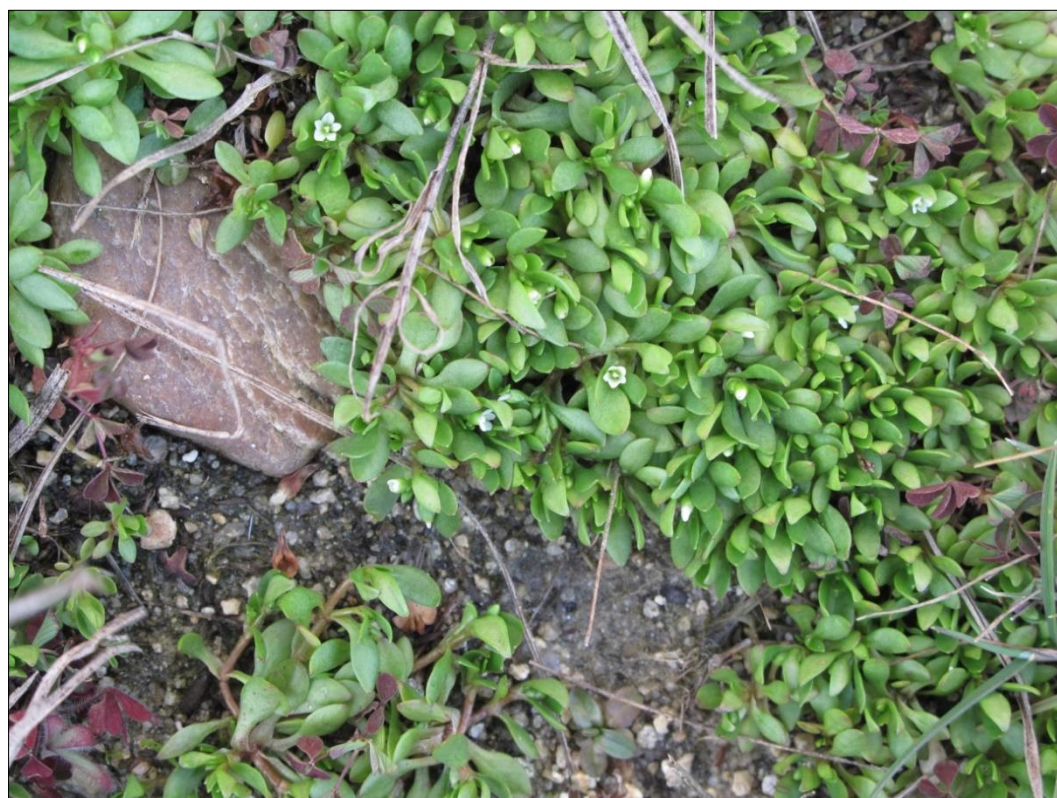

**Figure S9.** *Montia arvensis*, one of the rarest wetland annual species of the Czech Republic. In the Dehtář fishpond it grows over a variety of substrata, preferentially on sand or between stones in the upper part of the 2<sup>nd</sup> vegetation zone or its transition to *Carex acuta* or *Phalaris arundinacea* beds in about 50% of mapping segments. As a winter annual it flowers already in early spring and usually disappears by mid-May (March 2016).



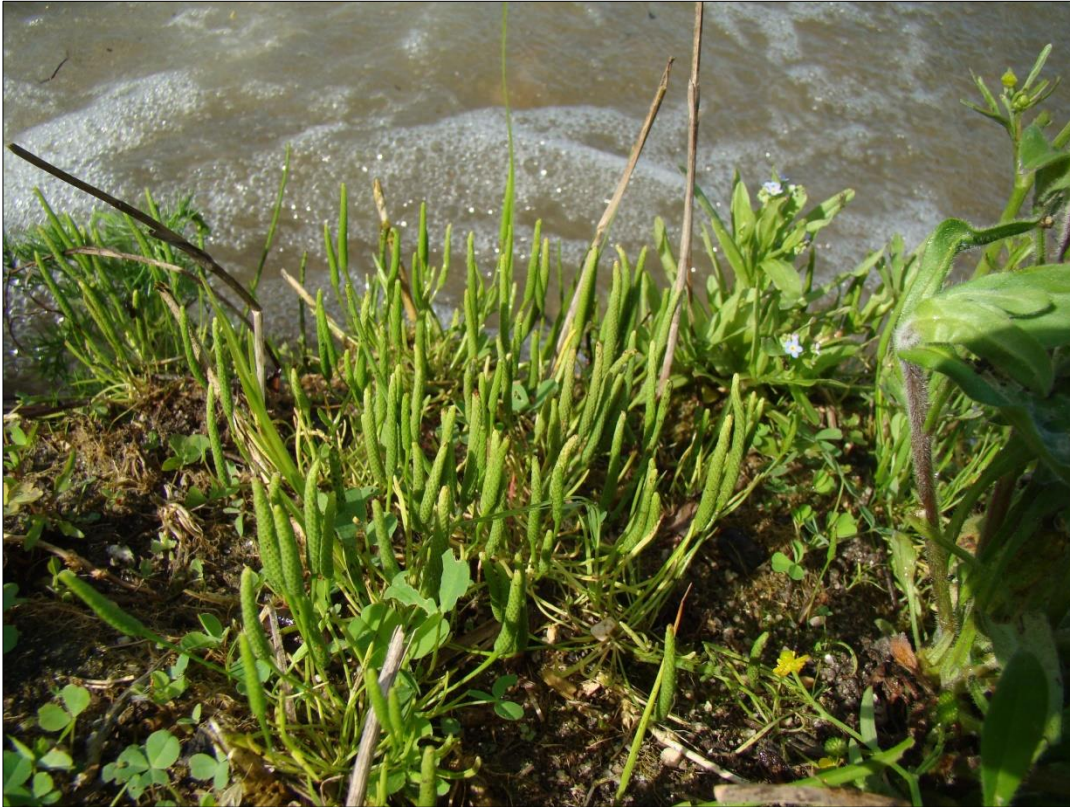

**Figure S10.** *Myosurus minimus* on the shore disturbed by wave action near the fishpond dam (segment 1), accompanied by *Myosotis* spp. and other wetland and weedy annual species (photo by M. Ducháček, May 2014).

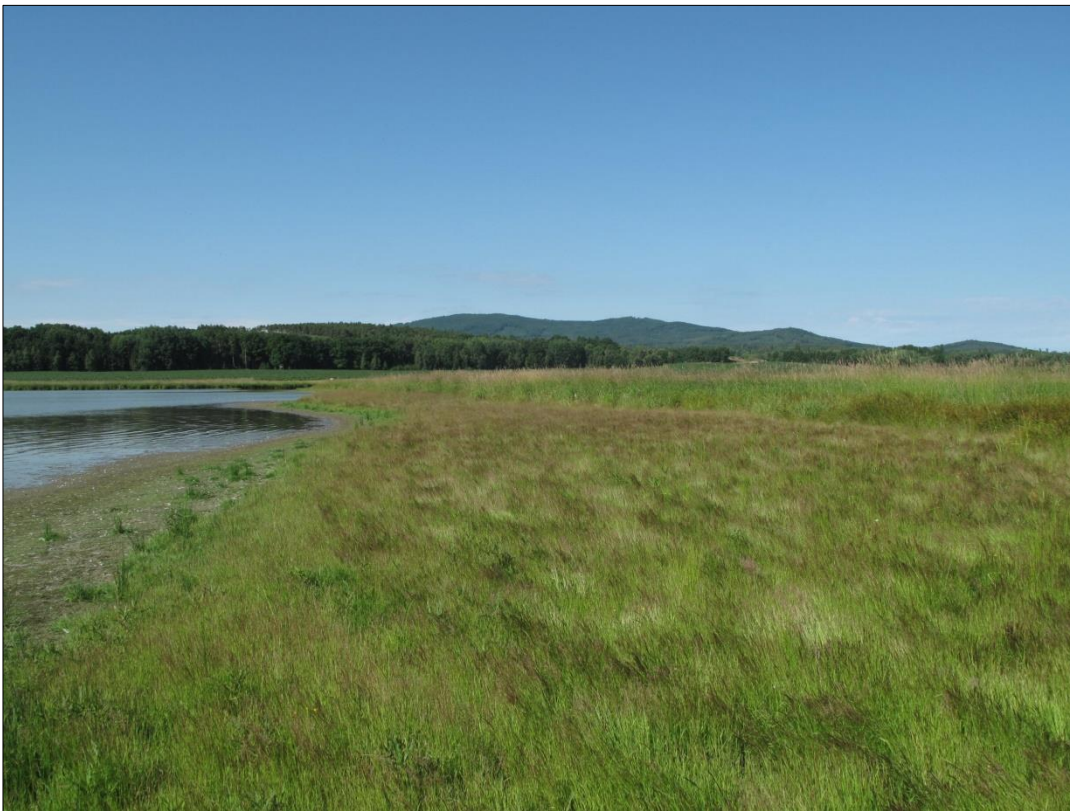

**Figure S11.** The Babický Stream Bay (segment 7) in the 2<sup>nd</sup> year of the management cycle. Due to continually low water levels, atypical for the 2<sup>nd</sup> management year, a part of the bottom is covered with wet disturbed grassland predominated by *Agrostis stolonifera* (the situation was similar at BSB before the flooding in 2016, see Figure S13). Its left margin was temporarily flooded and after a new exposure colonised by wetland annuals (July 2014).



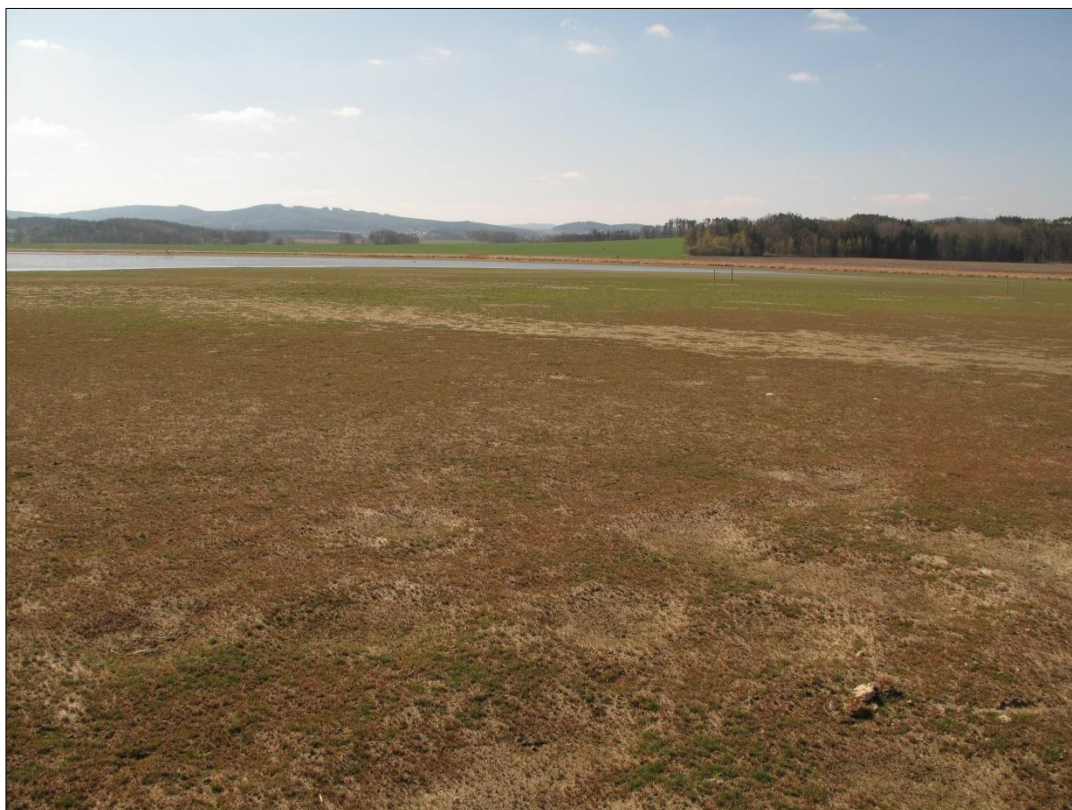

**Figure S12.** Large areas of exposed pond bottom in the Babický Stream Bay (segment 7) with the mosaic of wetland annual plant communities on sandy (e.g. *Juncus bufonius*) and muddy substrates (*Coleanthus subtilis*, *Ranunculus sceleratus*; April 2015). Vegetation development started already after the fish harvesting in 2014 and continued in spring of the 1<sup>st</sup> year of the management cycle.

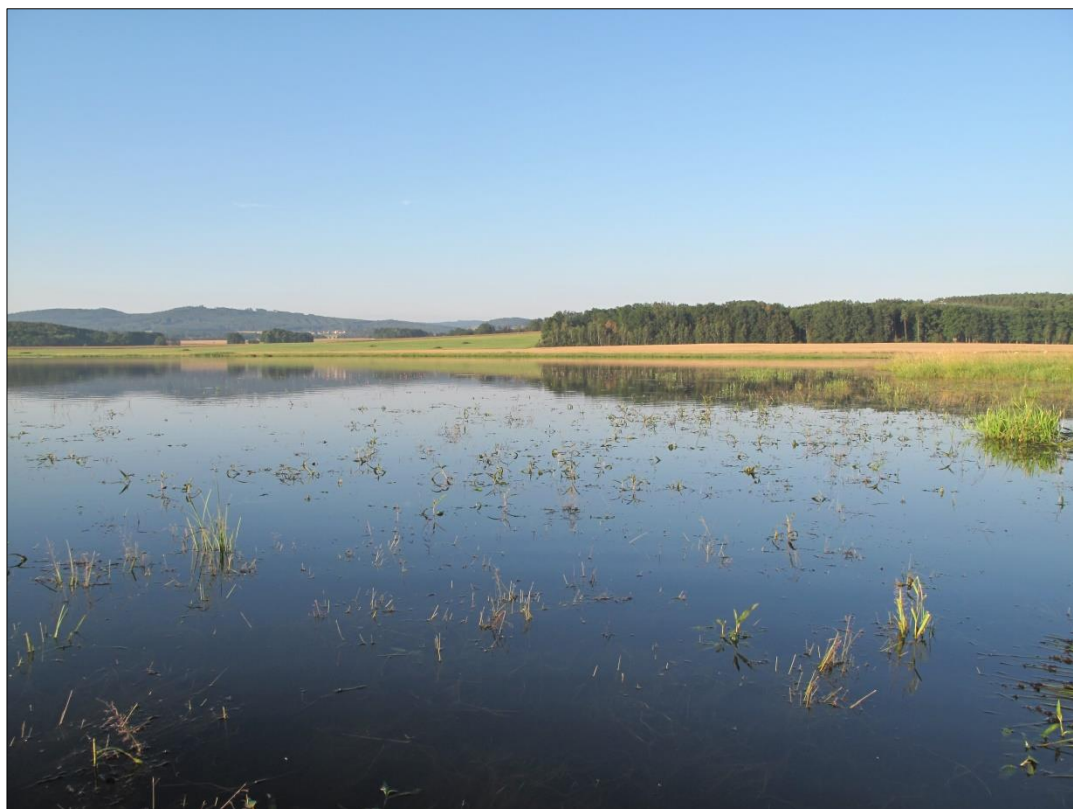

**Figure S13.** The Babický Stream Bay in July 2016 (segment 7). The uninterrupted succession in 2015/2016 resulted in vegetation of wet disturbed grasslands with e.g. *Agrostis stolonifera*, *Poa palustris* and *Persicaria amphibia*. At the end of May 2016 (2<sup>nd</sup> management year) the stands started to be gradually overflooded and in July only remnants of vegetation, from a large part flooded, occurred at the site. The stands were grazed by aquatic birds (mainly various Anseriformes) and by white carp (*Ctenopharyngodon idella*).



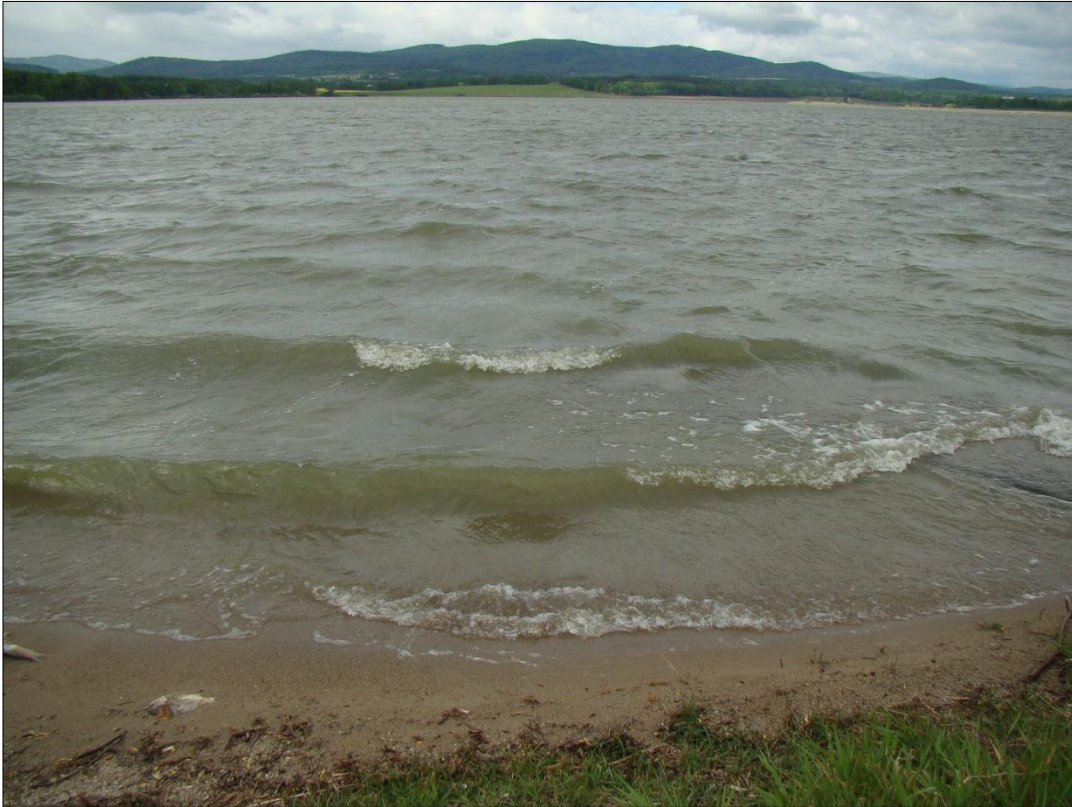

**Figure S14.** A windy day on the Dehtář fishpond. Wave-mediated disturbances on sandy shores near the fishpond dam (photo by M. Ducháček, May 2014).

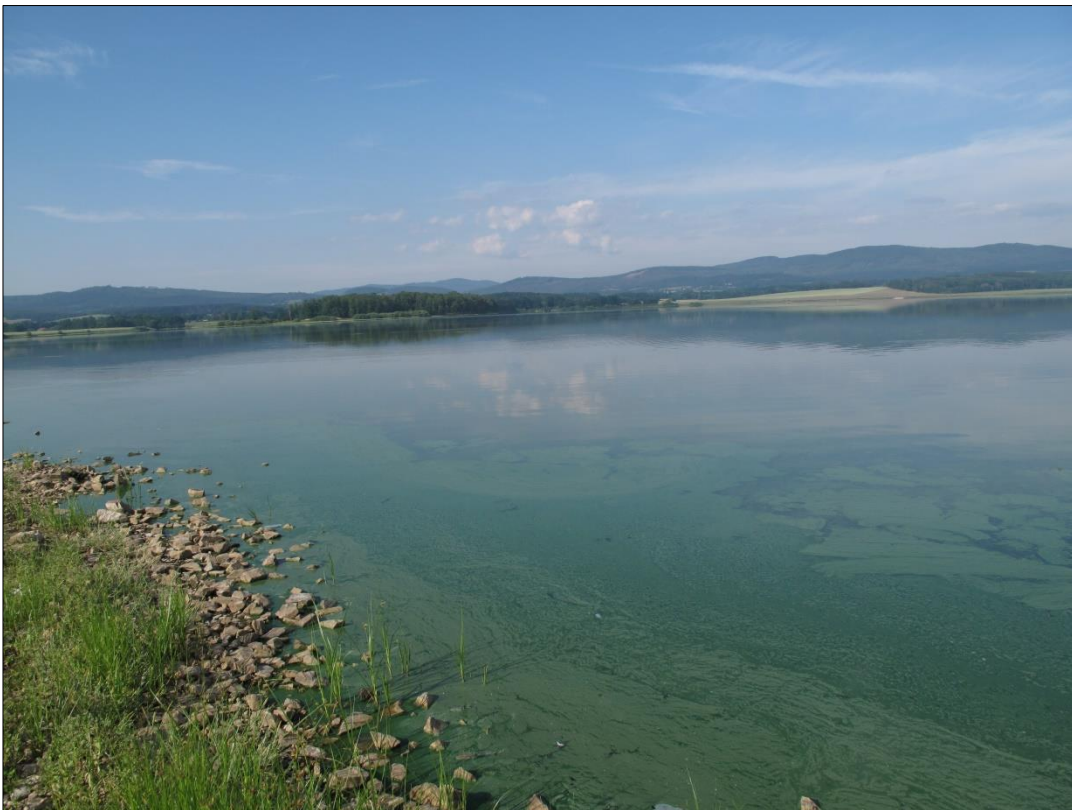

**Figure S15.** In 2019, strong winds occurred only scarcely at the Dehtář fishpond. The glassy water table was often covered by cyanobacterial mats during summer months (June 2019).
